# Supplementary material for: A novel taxonomic marker that discriminates between morphologically complex actinomycetes
Source: PubMed Central journal article supplement (PMC3814722; doi:10.1098/rsob.130073), 2013-10
Supplement: rsob130073supp1.pdf [file rsob130073supp1.pdf]

## **SUPPLEMENTARY MATERIAL**

belonging to the manuscript

**A novel taxonomic marker that discriminates between morphologically complex actinomycetes**

by

Geneviève Girard<sup>1</sup>, Bjørn A. Traag<sup>2</sup>, Vartul Sangal<sup>3</sup>, Nadine Mascini<sup>1</sup>, Paul A. Hoskisson<sup>3</sup>, Michael Goodfellow<sup>4</sup> and Gilles P. van Wezel<sup>1, #</sup>

<sup>1</sup>Molecular Biotechnology, Institute of Biology, Leiden University, PO Box 9505, 2300RA, Leiden, The Netherlands; <sup>2</sup> Department of Molecular and Cellular Biology, Harvard University, 16 Divinity Avenue, Cambridge, MA 02138; <sup>3</sup> Strathclyde Institute of Pharmacy and Biomedical Sciences, University of Strathclyde, Glasgow, UK; <sup>4</sup> School of Biology, Ridley Building, Newcastle University, NE1 7RU Newcastle upon Tyne, UK.

### **CONTENT:**

Supplemental Table S1

Supplemental Figures S1-S6

Supplemental Data files 1-5

**Table S1. Number of SALPs and developmental characteristics of completely sequenced actinomycetes.** For a list of all protein sequences and their accession numbers see Supplemental Data file 5.

| Species                                      | NCBI reference sequence | genome size (Mbp) | Nr of SALPs | cell morphology, development                            |
|----------------------------------------------|-------------------------|-------------------|-------------|---------------------------------------------------------|
| <i>Streptomyces avermitilis</i>              | NC_003155               | 9                 | 6           | aerial mycelium, long spore chains                      |
| <i>Streptomyces coelicolor</i>               | NC_003888               | 8.7               | 7           |                                                         |
| <i>Streptomyces griseus</i>                  | NC_010572               | 8.5               | 5           |                                                         |
| <i>Streptomyces scabiei</i>                  | NC_013929               | 10.1              | 7           |                                                         |
| <i>Streptomyces clavuligerus</i>             | NZ_CM001015             | 9.1               | 6           |                                                         |
| <i>Kitasatospora setae</i>                   | NC_016109               | 8.8               | 12          | short spore chains                                      |
| <i>Amycolatopsis mediterranei U32</i>        | NC_014318               | 10.2              | 5           |                                                         |
| <i>Frankia alni</i>                          | NC_008278               | 7.5               | 5           | multisporous sporangium                                 |
| <i>Frankia sp. Ccl3</i>                      | NC_007777               | 5.4               | 3           |                                                         |
| <i>Frankia sp. EAN1pec</i>                   | NC_009921               | 9                 | 3           |                                                         |
| <i>Frankia sp. QA3</i>                       | NZ_CM001489             | 7.6               | 4           |                                                         |
| <i>Frankia symbiont of Datisca glomerata</i> | NC_015656               | 5.3               | 2           | sporangium                                              |
| <i>Actinosynnema mirum</i>                   | NC_013093               | 8.3               | 2           | dome like structures with Synnemata                     |
| <i>Pseudonocardia dioxanivorans</i>          | NC_015312               | 7.4               | 2           | budding and fragmenting aerial mycelium                 |
| <i>Saccharomonospora viridis</i>             | NC_013159               | 4.3               | 2           | single spores in aerial mycelium                        |
| <i>Saccharothrix espanaensis</i>             | NC_019673               | 9.4               | 2           | nocardioform mycelia and rod-shaped spores              |
| <i>Saccharopolyspora erythraea</i>           | NC_009142               | 8.2               | 3           | spore chains with spiny spores                          |
| <i>Saccharopolyspora spinosa NRRL 18395</i>  | NZ_AEYC00000000         | 8.5               | 8           |                                                         |
| <i>Streptosporangium roseum</i>              | NC_013595               | 10.4              | 2           | sporangia on aerial hyphae                              |
| <i>Acidothermus cellulolyticus</i>           | NC_008578               | 2.4               | 1           | long slender filaments, no spores                       |
| <i>Actinoplanes missouriensis</i>            | NC_017093               | 8.8               | 1           | sporangium in mycelium                                  |
| <i>Blastococcus saxobidens DD2</i>           | NC_016943               | 4.9               | 1           | aggregated cocci or rods forming multiseptate filaments |
| <i>Catenulispora acidiphila</i>              | NC_013131               | 10.5              | 1           | chains of cylindrical arthrospores                      |
| <i>Cellulomonas fimi</i>                     | NC_015514               | 4.3               | 1           | irregular rod shape, no spores                          |
| <i>Geodermatophilus obscurus</i>             | NC_013757               | 5.3               | 1           | aggregated cocci or rods forming multiseptate filaments |
| <i>Kineococcus radiotolerans</i>             | NC_009664               | 5.0               | 1           | multicellular structures                                |
| <i>Micromonospora</i>                        | NC_014391               | 7.0               | 1           | single spores from vegetative                           |

|                                   |           |     |   |                                                                         |
|-----------------------------------|-----------|-----|---|-------------------------------------------------------------------------|
| <i>aurantiaca</i>                 |           |     |   | mycelium                                                                |
| <i>Modestobacter marinus</i>      | NC_017955 | 5.6 | 1 | aggregated cocci or rods forming multiseptate filaments                 |
| <i>Nakamurella multipartita</i>   | NC_013235 | 6.1 | 1 | cocci in small irregular clusters; no spores                            |
| <i>Nocardioides sp. JS614</i>     | NC_08699  | 5.3 | 1 | rods or cocci, no spores                                                |
| <i>Nocardiopsis alba</i>          | NC_018524 | 5.9 | 1 | hyphae that fragment into smooth rod-shaped spores                      |
| <i>Salinispora arenicola</i>      | NC_009953 | 5.8 | 1 | single spores from vegetative mycelium                                  |
| <i>Salinispora tropica</i>        | NC_009380 | 5.2 | 1 |                                                                         |
| <i>Stackebrandtia nassauensis</i> | NC_013947 | 6.8 | 1 | fragmenting aerial hyphae                                               |
| <i>Thermobifida fusca</i>         | NC_007333 | 3.6 | 1 | single spores borne on branched sporophores                             |
| <i>Thermobispora bispora</i>      | NC_014165 | 4.2 | 1 | aerial mycelia branch monopodally and bear longitudinal pairs of spores |
| <i>Thermomonospora curvata</i>    | NC_013510 | 5.7 | 1 | single, warty spores on sporophores (on vegetative and aerial hyphae)   |
| <i>Verrucosispora maris</i>       | NC_015434 | 6.7 | 1 | single spores from mycelium                                             |

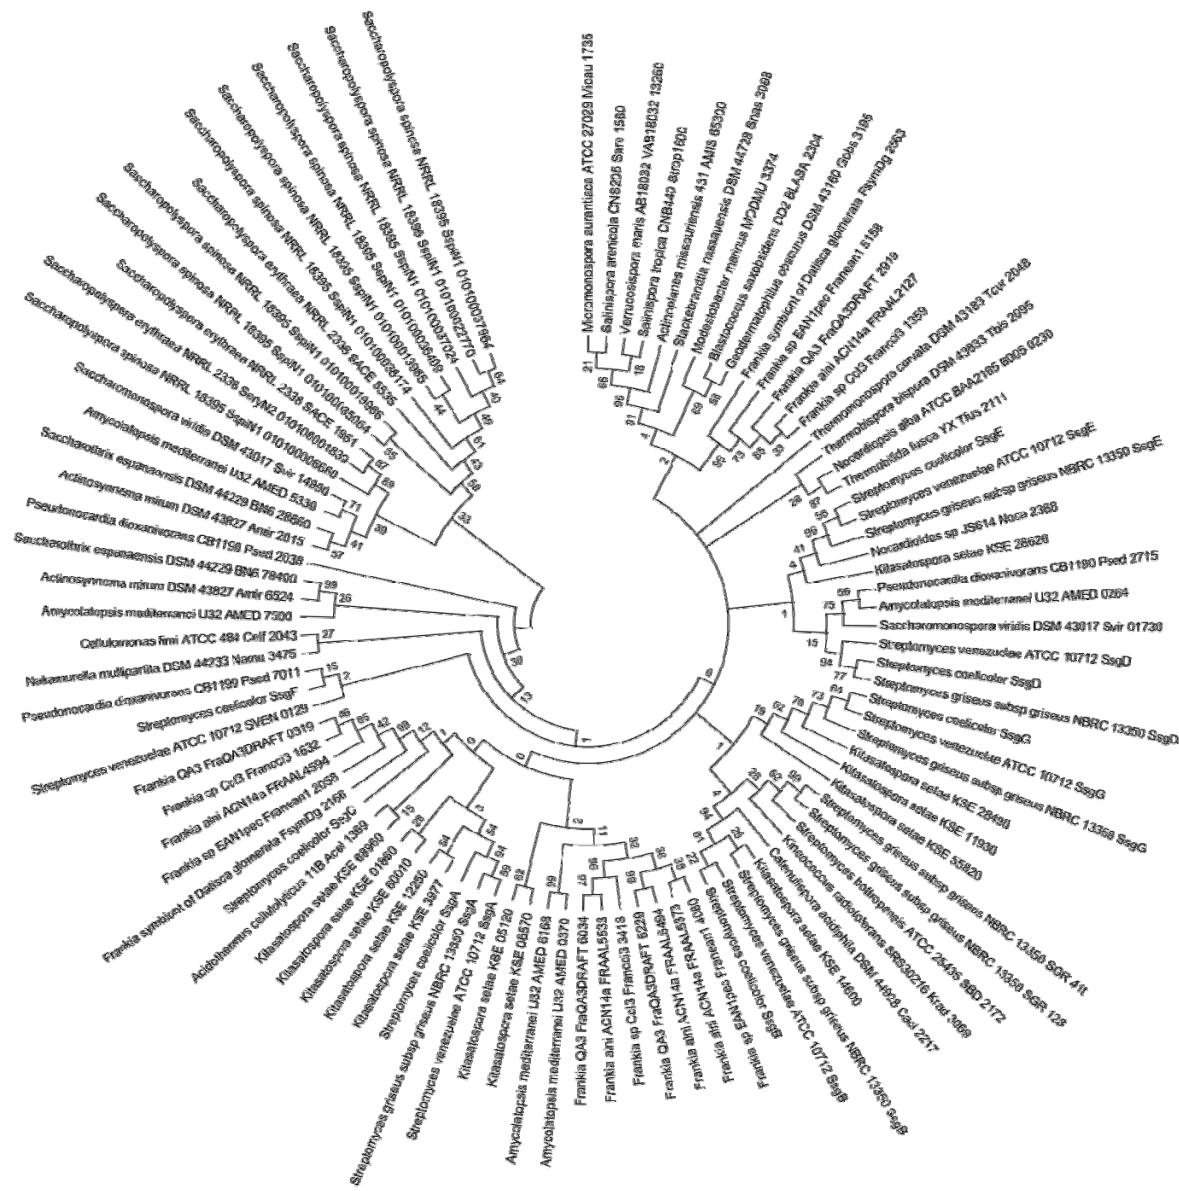

**Figure S1. Maximum-likelihood tree based on the alignment of SALPs proteins from a range of morphologically complex actinomycetes.** For input sequences and their accession numbers see Supplemental Data file 5.

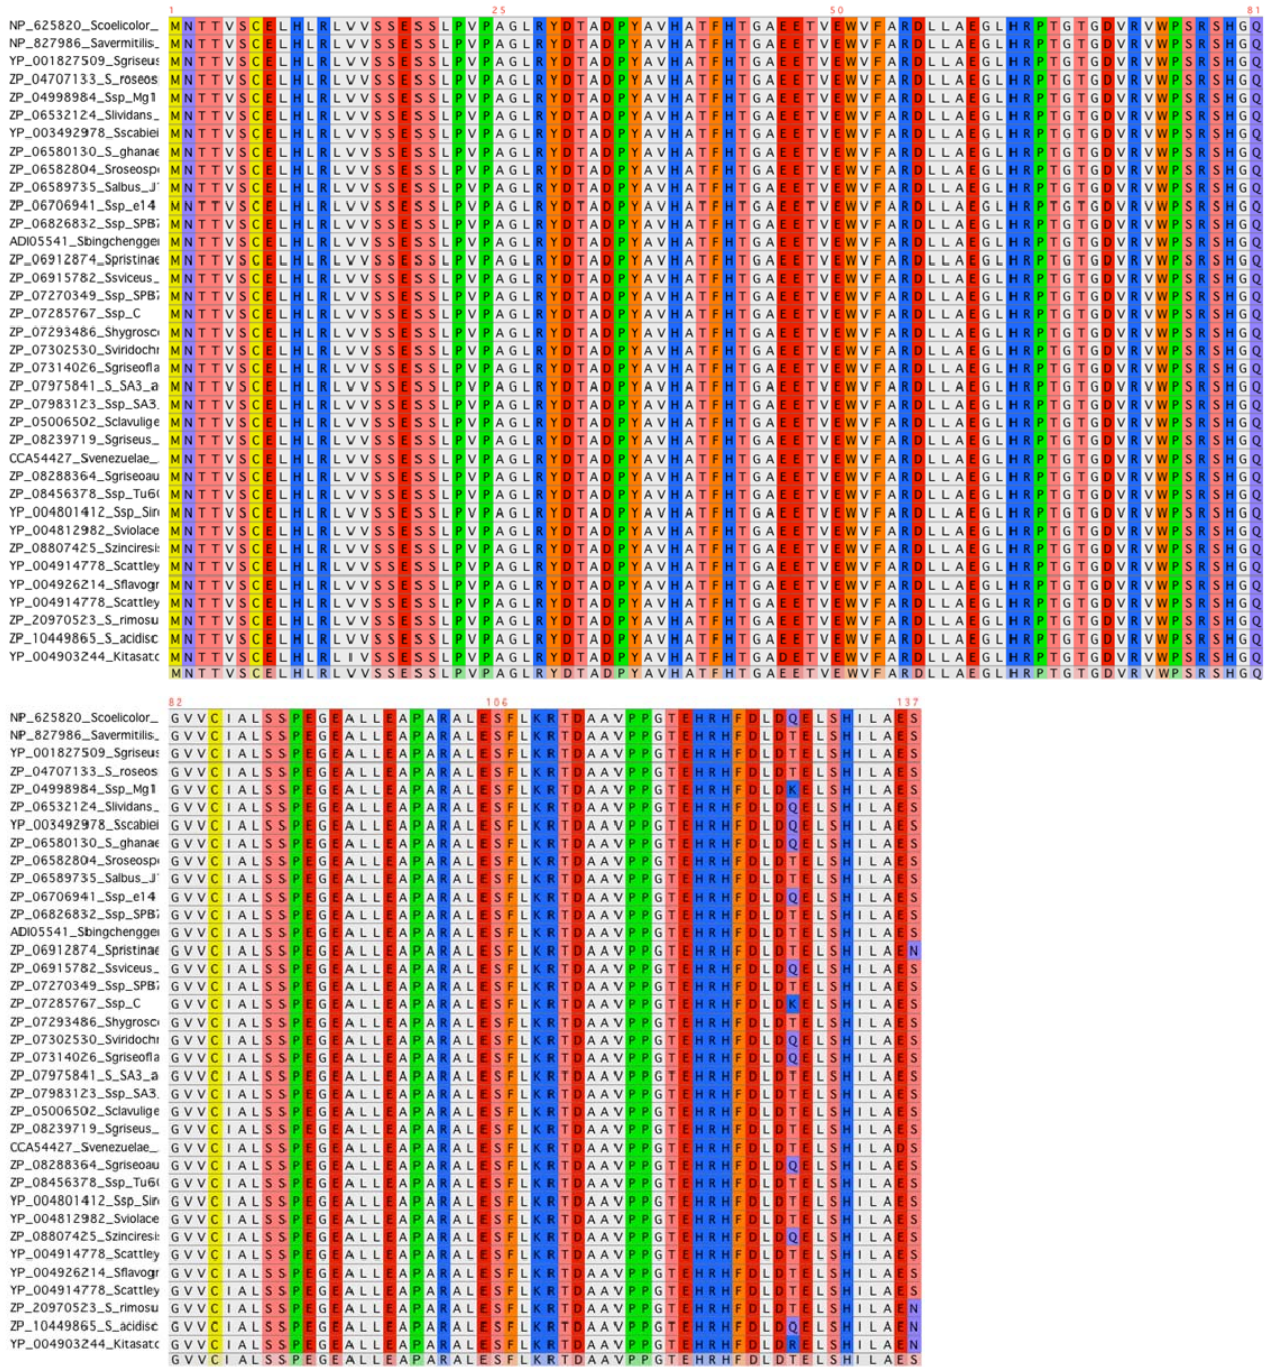

**Figure S2. Alignment of SsgB orthologues.** All species are *Streptomyces* sp., except *Kitasatospora setae* at the bottom. For input sequences and their accession numbers see Supplemental Data file 5.

|                                |     |                                                               |
|--------------------------------|-----|---------------------------------------------------------------|
| Salinispora_arenicola          | 1   | MSVIRPTTVEVETSLRLVAPDATALPVRASLRYDPADPYAVHVLFFHAESAGGEAVSWSFA |
| Salinispora_tropica            | 1   | MSVIRPTTVEVETSLRLVAPDATALPVRASLRYDPADPYAVHVLFFHAESAGGEAVSWSFA |
| Micromonospora_ATCC39149       | 1   | MSVIRPTTVEVETSLRLVAPDATALPVRASLRYDPADPYAVHVLFFHAESAGGEAVSWSFA |
| Micromonospora_sp.L5           | 1   | MSVIRPTTVEVETSLRLVAPDATALPVRASLRYDPADPYAVHVLFFHAESAGGEAVSWSFA |
| Verrucosipora_maris            | 1   | MSVIRPTTVEVETSLRLVAPDATALPVRASLRYDPADPYAVHVLFFHAESAGGEAVSWSFA |
| Micromonospora_aurantiaca_ATCC | 1   | MSVIRPTTVEVETSLRLVAPDATALPVRASLRYDPADPYAVHVLFFHAESAGGEAVSWSFA |
| Actinoplanes_sp.SE50/110       | 1   | MSVIRPTTVEVETSLRLVAPDATALPVRASLRYDPADPYAVHVLFFHAESAGGEAVSWSFA |
|                                |     |                                                               |
| Salinispora_arenicola          | 61  | RELLVTGLDEPAGIGDVRVWPWATPRGDFVALALSSPDGNALFEVPRSVLVRFLRRTYVV  |
| Salinispora_tropica            | 61  | RELLVTGLDEPAGIGDVRVWPWATPRGDFVALALSSPDGNALFEVPRSVLVRFLRRTYVV  |
| Micromonospora_ATCC39149       | 61  | RELLVTGLDEPAGIGDVRVWPWATPRGDFVALALSSPDGNALFEVPRSVLVRFLRRTYVV  |
| Micromonospora_sp.L5           | 61  | RELLVTGLDEPAGIGDVRVWPWATPRGDFVALALSSPDGNALFEVPRSVLVRFLRRTYVV  |
| Verrucosipora_maris            | 61  | RELLVTGLDEPAGIGDVRVWPWATPRGDFVALALSSPDGNALFEVPRSVLVRFLRRTYVV  |
| Micromonospora_aurantiaca_ATCC | 61  | RELLVTGLDEPAGIGDVRVWPWATPRGDFVALALSSPDGNALFEVPRSVLVRFLRRTYVV  |
| Actinoplanes_sp.SE50/110       | 61  | RELLVTGLDEPAGIGDVRVWPWATPRGDFVALALSSPDGNALFEVPRSVLVRFLRRTYVV  |
|                                |     |                                                               |
| Salinispora_arenicola          | 121 | VARGREAEHLDVDTAVSRLLAGR                                       |
| Salinispora_tropica            | 121 | VARGREAEHLDVDTAVNRLLAGR                                       |
| Micromonospora_ATCC39149       | 121 | VPRGREAEHLDVDTAVSRLLAGR                                       |
| Micromonospora_sp.L5           | 121 | VPRGREAEHLDVDTAVNRLLAGR                                       |
| Verrucosipora_maris            | 121 | VPRGREAEHLDVDTAVNRLLAGR                                       |
| Micromonospora_aurantiaca_ATCC | 121 | VPRGREAEHLDVDTAVNRLLAGR                                       |
| Actinoplanes_sp.SE50/110       | 121 | VPRGREAEHLDVDTAVNRLLAGR                                       |

**Figure S3. Alignment of SsgB proteins from *Micromonospora*, *Salinispora* and *Verrucosipora*.** Species from which SsgB orthologues originate are indicated on the left. For shading, at least 50% of the aligned proteins should share the same or similar aa residues. Identical residues shaded black, similar residues shaded grey. For input sequences and their accession numbers see Supplemental Data file 1.



```

SCO1541      1  ATGAACACCACGGTCAGCTGCGAGCTGCACCTGCGCCTCGTTGTGTGTCGAGCGAGTCCTCA
SCAB74621   1  ATGAACACCACGGTCAGCTGCGAGCTGCACCTGCGCCTCGTTGTGTGTCGAGCGAGTCCTCA
SAV_6810    1  ATGAACACCACGGTCAGCTGCGAGCTGCACCTGCGCCTCGTTGTGTGTCGAGCGAGTCCTCA
SVEN_1140   1  ATGAACACCACGGTCAGCTGCGAGCTGCACCTGCGCCTCGTTGTGTGTCGAGCGAGTCCTCA
SGR_5997    1  ATGAACACCACGGTCAGCTGCGAGCTGCACCTGCGCCTCGTTGTGTGTCGAGCGAGTCCTCA
SCLAV_0768  1  ATGAACACCACGGTCAGCTGCGAGCTGCACCTGCGCCTCGTTGTGTGTCGAGCGAGTCCTCA
STRS4_00308 1  ATGAACACCACGGTCAGCTGCGAGCTGCACCTGCGCCTCGTTGTGTGTCGAGCGAGTCCTCA
KSE_14600   1  ATGAACACCACGGTCAGCTGCGAGCTGCACCTGCGCCTCGTTGTGTGTCGAGCGAGTCCTCA
          *

SCO1541      61  CTGCCCTGTCCCAGGCGGCTGCGGTAAGACACGGCCGACCCCTAGCCCGTGCACGCCACC
SCAB74621   61  CTGCCCTGTCCCAGGCGGCTGCGGTAAGACACGGCCGATCCCTAGCCCGTGCACGCCACC
SAV_6810    61  CTGCCCTGTACCAGGCGGCTGCGGTAAGACACGGCCGATCCCTAGCCCGTGCACGCCACC
SVEN_1140   61  CTGCCCTGTACCAGGCGGCTGCGGTAAGACACGGCCGATCCCTAGCCCGTGCACGCCACC
SGR_5997    61  CTGCCCTGTACCAGGCGGCTGCGGTAAGACACGGCCGATCCCTAGCCCGTGCACGCCACC
SCLAV_0768  61  CTGCCCTGTACCAGGCGGCTGCGGTAAGACACGGCCGATCCCTAGCCCGTGCACGCCACC
STRS4_00308 61  CTGCCCTGTACCAGGCGGCTGCGGTAAGACACGGCCGATCCCTAGCCCGTGCACGCCACC
KSE_14600   61  CTGCCCTGTCCCAGGCGGCTGCGGTAAGACACGGCCGATCCCTAGCCCGTGCACGCCACC

SCO1541      121  TTCCACACCAGGACGAGGAGACGTCGAGTGGGTTCGCCCAGCGACCTCTCGCCGAA
SCAB74621   121  TTCCACACCAGGACGAGGAGACGTCGAGTGGGTTCGCCCAGCGACCTCTCGCCGAA
SAV_6810    121  TTCCACACCAGGACGAGGAGACGTCGAGTGGGTTCGCCCAGCGACCTCTCGCCGAA
SVEN_1140   121  TTCCACACCAGGACGAGGAGACGTCGAGTGGGTTCGCCCAGCGACCTCTCGCCGAA
SGR_5997    121  TTCCACACCAGGACGAGGAGACGTCGAGTGGGTTCGCCCAGCGACCTCTCGCCGAA
SCLAV_0768  121  TTCCACACCAGGACGAGGAGACGTCGAGTGGGTTCGCCCAGCGACCTCTCGCCGAA
STRS4_00308 121  TTCCACACCAGGACGAGGAGACGTCGAGTGGGTTCGCCCAGCGACCTCTCGCCGAA
KSE_14600   121  TTCCACACCAGGACGAGGAGACGTCGAGTGGGTTCGCCCAGCGACCTCTCGCCGAA

SCO1541      181  GGCCTGCACCGGCCACCGGCACCGGCGACGTCGGTGTCTGGCCGTCCCGCAGTCACGGC
SCAB74621   181  GGCCTGCACCGGCCACCGGCACCGGCGACGTCGGTGTCTGGCCGTCCCGCAGTCACGGC
SAV_6810    181  GGCCTGCACCGGCCACCGGCACCGGCGACGTCGGTGTCTGGCCGTCCCGCAGTCACGGC
SVEN_1140   181  GGCCTGCACCGGCCACCGGCACCGGCGACGTCGGTGTCTGGCCGTCCCGCAGTCACGGC
SGR_5997    181  GGCCTGCACCGGCCACCGGCACCGGCGACGTCGGTGTCTGGCCGTCCCGCAGTCACGGC
SCLAV_0768  181  GGCCTGCACCGGCCACCGGCACCGGCGACGTCGGTGTCTGGCCGTCCCGCAGTCACGGC
STRS4_00308 181  GGCCTGCACCGGCCACCGGCACCGGCGACGTCGGTGTCTGGCCGTCCCGCAGTCACGGC
KSE_14600   181  GGCCTGCACCGGCCACCGGCACCGGCGACGTCGGTGTCTGGCCGTCCCGCAGTCACGGC

SCO1541      241  CAGGGCGTCGTGTCATCGCTCTGAGCTCCCCGGAGGGCGAGGCCCTGCTCGAGGCCCG
SCAB74621   241  CAGGGCGTCGTGTCATCGCTCTGAGCTCCCCGGAGGGCGAGGCCCTGCTCGAGGCCCG
SAV_6810    241  CAGGGCGTCGTGTCATCGCTCTGAGCTCCCCGGAGGGCGAGGCCCTGCTCGAGGCCCG
SVEN_1140   241  CAGGGCGTCGTGTCATCGCTCTGAGCTCCCCGGAGGGCGAGGCCCTGCTCGAGGCCCG
SGR_5997    241  CAGGGCGTCGTGTCATCGCTCTGAGCTCCCCGGAGGGCGAGGCCCTGCTCGAGGCCCG
SCLAV_0768  241  CAGGGCGTCGTGTCATCGCTCTGAGCTCCCCGGAGGGCGAGGCCCTGCTCGAGGCCCG
STRS4_00308 241  CAGGGCGTCGTGTCATCGCTCTGAGCTCCCCGGAGGGCGAGGCCCTGCTCGAGGCCCG
KSE_14600   241  CAGGGCGTCGTGTCATCGCTCTGAGCTCCCCGGAGGGCGAGGCCCTGCTCGAGGCCCG

SCO1541      301  GCGCGGGCCCTGGAGTCTTCTTCTGAAGCGCACAGACGCCGCCGTGCCCCCGGCACGAA
SCAB74621   301  GCGCGAGCCCTGGAGTCTTCTTCTGAAGCGCACAGACGCCGCCGTGCCCCCGGCACGAA
SAV_6810    301  GCGCGGGCCCTGGAGTCTTCTTCTGAAGCGCACAGACGCCGCCGTGCCCCCGGCACGAA
SVEN_1140   301  GCGCGGGCCCTGGAGTCTTCTTCTGAAGCGCACAGACGCCGCCGTGCCCCCGGCACGAA
SGR_5997    301  GCGCGGGCCCTGGAGTCTTCTTCTGAAGCGCACAGACGCCGCCGTGCCCCCGGCACGAA
SCLAV_0768  301  GCGCGGGCCCTGGAGTCTTCTTCTGAAGCGCACAGACGCCGCCGTGCCCCCGGCACGAA
STRS4_00308 301  GCGCGGGCCCTGGAGTCTTCTTCTGAAGCGCACAGACGCCGCCGTGCCCCCGGCACGAA
KSE_14600   301  GCGCGGGCCCTGGAGTCTTCTTCTGAAGCGCACAGACGCCGCCGTGCCCCCGGCACGAA

SCO1541      361  CACCGGCACCTTCGATCTCGATCAGGAGCTCTGCACATCCTGGCCGAAAGCTAG
SCAB74621   361  CACCGGCACCTTCGATCTCGATCAGGAGCTCTGCACATCCTGGCCGAAAGCTAG
SAV_6810    361  CACCGGCACCTTCGATCTCGATCAGGAGCTCTGCACATCCTGGCCGAAAGCTAG
SVEN_1140   361  CACCGGCACCTTCGATCTCGATCAGGAGCTCTGCACATCCTGGCCGAAAGCTAG
SGR_5997    361  CACCGGCACCTTCGATCTCGATCAGGAGCTCTGCACATCCTGGCCGAAAGCTAG
SCLAV_0768  361  CACCGGCACCTTCGATCTCGATCAGGAGCTCTGCACATCCTGGCCGAAAGCTAG
STRS4_00308 361  CACCGGCACCTTCGATCTCGATCAGGAGCTCTGCACATCCTGGCCGAAAGCTAG
KSE_14600   361  CACCGGCACCTTCGATCTCGATCAGGAGCTCTGCACATCCTGGCCGAAAGCTAG
          **

```

**Figure S4. Alignment of *ssgB* genes from *Streptomyces* and *Kitasatospora*.** The locus of each gene within corresponding genomes is indicated. The *ssgB* genes are from the genome sequences of *Streptomyces coelicolor* (SCO1541), *S. scabies* (Scab74621), *S. avermitilis* (SAV\_6810), *S. venezuelae* (SVEN1140), *S. griseus* (SGR\_5997) *S. clavuligerus*

(SCLAV\_0768), *S. sp. S4* (STRS4\_00308) and *Kitasatospora setae* (KSE\_14600).

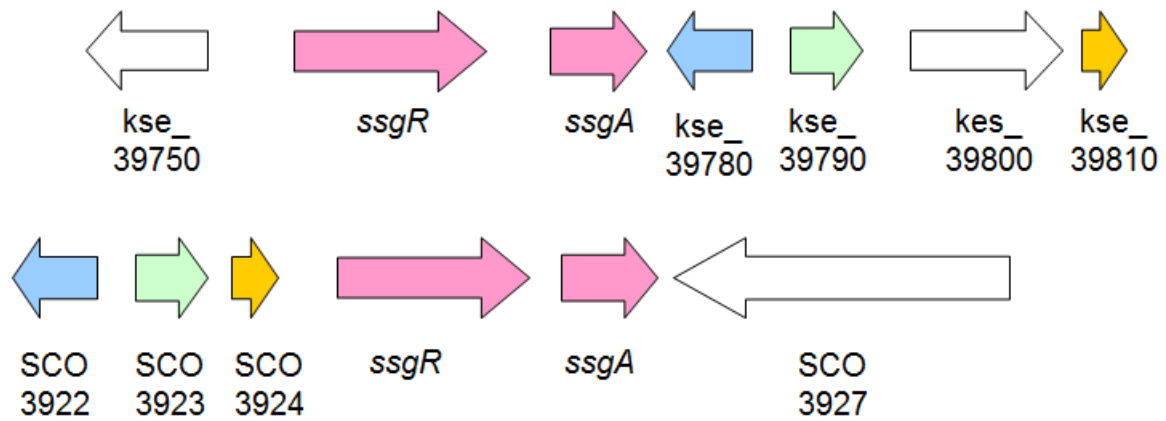

**Figure S5. Gene synteny around *ssgA* from *Streptomyces coelicolor* and**

***Kitasatospora setae*.** Direct orthologues are presented in the same colours (white genes are not related).



|                    |     |                                                    |                      |
|--------------------|-----|----------------------------------------------------|----------------------|
| Frankia_alni       | 1   | MTIRHDSITAEIALRLVPPGAPVPVAATVRYEPADPYA             | ISIGFRTGADEVVWTFARQL |
| Frankia_sp.CcI3    | 1   | MTIRHDSITAEIALRLVPPGAPVPVAATVRYEPADPYA             | ISIGFRTGADEVVWTFARQL |
| Frankia_sp.EAN1pec | 1   | MTIRHDSITAEIALRLVPPGAPVPVAATVRYEPADPYAVS           | ISIGFRTGADEVVWTFARQL |
| Frankia_sp.EUN1f   | 1   | MTIRHDSITAEIALRLVPPGAPVPVAATVRYEPADPYAVS           | ISIGFRTGADEVVWTFARQL |
| Frankia_sp.CN3     | 1   | MTIRHDSITAEIALRLVPPGAPVPVAATVRYEPADPYAVS           | ISIGFRTGADEVVWTFARQL |
| Frankia_symbiont   | 1   | MTIRHDSITAEIALRLVPPGAPVPVAATVRYEPADPYAVS           | ISIGFRTGADEVVWTFARQL |
|                    |     |                                                    |                      |
| Frankia_alni       | 38  | LSDGVRRPAGDGDVQVWPAAQSGGRIVCLSLSSPSGHALFEMPRSEVLAF | FLRRTYSAVPL          |
| Frankia_sp.CcI3    | 61  | LSDGVRRPAGDGDVQVWPAAQSGGRIVCLSLSSPSGHALFEMPRSEVLAF | FLRRTYSAVPL          |
| Frankia_sp.EAN1pec | 61  | LSDGVRRPAGDGDVQVWPAAQSGGRIVCLSLSSPSGHALFEMPRSEVLAF | FLRRTYSAVPL          |
| Frankia_sp.EUN1f   | 61  | LSDGVRRPAGDGDVQVWPAAQSGGRIVCLSLSSPSGHALFEMPRSEVLAF | FLRRTYSAVPL          |
| Frankia_sp.CN3     | 61  | LSDGVRRPAGDGDVQVWPAAQSGGRIVCLSLSSPSGHALFEMPRSEVLAF | FLRRTYSAVPL          |
| Frankia_symbiont   | 61  | LSDGVRRPAGDGDVQVWPAAQSGGRIVCLSLSSPSGHALFEMPRSEVLAF | FLRRTYSAVPL          |
|                    |     |                                                    |                      |
| Frankia_alni       | 98  | GGESDVIDLDAELALLIWGGPER                            |                      |
| Frankia_sp.CcI3    | 121 | GGESDVIDLDAELALLIWGGPER                            |                      |
| Frankia_sp.EAN1pec | 121 | GGESDVIDLDAELALLIWGGPER                            |                      |
| Frankia_sp.EUN1f   | 121 | GGESDVIDLDAELALLIWGGPER                            |                      |
| Frankia_sp.CN3     | 121 | GGESDVIDLDAELALLIWGGPER                            |                      |
| Frankia_symbiont   | 121 | GGESVIDLDAELALLIWGGPQT                             |                      |

**Figure S6. Alignment of SsgB orthologues from different *Frankia* species.** Species from which SsgB orthologues originate are indicated on the left. For shading, at least 50% of the aligned proteins should share the same or similar aa residues. Identical residues shaded black, similar residues shaded grey. For input sequences and their accession numbers see Supplemental Data file 1.

**Supplemental Data file 1. 16S rRNA sequences from actinomycetes used as input for Figure 1.**

```
>gb|CP000481.1|:1397655-1399163 Acidothermus cellulolyticus 11B,
complete genome
GTTTGTATCCTGGCTCAGGACGAACGCTGGCGGCGTGCTTAAACACATGCAAGTCGAGCGGAAAGGCCCTTC
GGGGTACTCGAGCGGCGAACGGGTGAGTAACACGTGGGCAACCTACCCCCAGCACCAGGGATAACCCCGGG
AAACCGGGGCTAATACCGGATATGCACCTCGGGTGGCATCACCTGAGGTGGAAAGCTTTTGC GGCTGGGG
ATGGGCCCGCGGCCTATCAGCTTGTGGTGGGGTAACGGCCTACCAAGGCGACGACGGGTAGCCGGCCTG
AGAGGGCGACCGGCCACACTGGGACTGAGACACGGCCCAGACTCCTACGGGAGGCAGCAGTGGGGAATAT
TGCGCAATGGGCGAAAGCCTGACGCAGCGACGCCGCGTGGGGGAAGAAGGCCTTCGGGTTGTAAACCCCT
TTCAGCAGGAACGAAGCGAAAGTGACGGTACCTGCAGAAGAAGCACCCGGCTAACTACGTGCCAGCAGCCG
CGGTAATACGTAGGGTGCAAGCGTTGTCCGGATTTACTGGGCGTAAAGAGCTCGTAGGCGGTCTGTTCGCG
TCGGATGTGAAAACCCAGGGCTCAACCCTGGGCCTGCATTCGATACGGGCAGACTAGAGTGCGGCAGGGG
AGACTGGAATTCCTGGTGTAGCGGTGAAATGCGCAGATATCAGGAGGAACACCCGGTGGCGAAGGCGGGTC
TCTGGGCCGCAACTGACGCTGAGGAGCGAAAGCGTGGGGAGCGAACAGGATTAGATAACCTGGTAGTCCA
CGCTGTAAACGTTGGGCGCTAGGTGTGGGGACTTTCCACGTCTCCGTGCCGCAGCTAACGCATTAAGC
GCCCCGCTGGGGAGTACGGCCGCAAGGCTAAAACCTCAAAGGAATTGACGGGGGCCCGCACAAGCGGCGG
AGCATGTGGCTTAATTTCGATGCAACGCGAAGAACCTTACCTGGGCTTGACATGCAGGGAAATCCGGCAGA
GATGCCGGGTCCGCAAGGGCCCTGCACAGGTGGTGCATGGCTGTCTCAGCTCGTGTCTGTGAGATGTTGG
GTTAAGTCCCGCAACGAGCGCAACCCCTCGTCCCATGTTGCCAGCGGGTAATGCCGGGGACTCATGGGAGA
CTGCCGGGGTCAACTCGGAGGAAGGTGGGGATGACGTCAAGTCATCATGCCCCTTACGTCCAGGGCTGCA
CACATGCTACAATGGCCGGTACAAAGGGCTGCGAAACCGTGAGGTGGAGCGAATCCCAAAAAGCCGGTCT
CAGTTCGGATCGGGTCTGCAACTCGACCCCGTGAAGTCGGAGTCGCTAGTAATCGCGGATCAGCAATGC
CGCGGTGAATACGTTCCCGGGCCTTGTACACACCGCCCCGTACGTCACGAAAGTCGGTAACACCCGAAGC
CGGTGGCCCAACCCGCAAGGGAGGGAGCCGTGCAAGGTGGGACCGGCGATTGGGACGAAGTCGTAACAAG
GTAGCCGTACCGGAAGGTGTGGCTGGATCACCTCCTTTC
>gi|381368402:4544018-4545534 Actinoplanes missouriensis 431 DNA,
complete genome
TGTTGGAGAGTTTGTATCCTGGCTCAGGACGAACGCTGGCGGCGTGCTTAAACACATGCAAGTCGAGCGGAA
AGGCCCTTCGGGTACTCGAGCGGCGAACGGGTGAGTAACACGTGAGTAACCTGCCCCGAACTTTGGGAT
AACCTTCGAAACGGGGGCTAATACCGAATACGACACGCCTTCGCATGGGGTGCCTGTGAAAAGTTTTTTC
GGTTCGGGATGGACTCGCGGCCTATCAGCTTGTGGTGGGGTAATGGCCTACCAAGGCGACGACGGGTAG
CCGGCCTGAGAGGGCGACCGGCCACACTGGGACTGAGACACGGCCCAGACTCCTACGGGAGGCAGCAGTG
GGGAATATTGCACAATGGGCGGAAGCCTGATGCAGCGACGCCGCGTGGGGATGACGGCCTTCGGGTTGT
AAACCTCTTTCAGCAGGGACGAAGCGCAAGTGACGGTACCTGCAGAAGAAGCGCCGGCCAACCTACGTGCC
AGCAGCCGCGGTAAGACGTAGGGCGGAGCGTTGTCCGGATTTATTGGGCGTAAAGAGCTCGTAGGCGGC
TTGTTCGCGTTCGAATGTGAAATCTCGGGGCTCAACTCCGAGCTTGCAATTCGATACGGGCAGGCTAGAGTTC
GGTAGGGGAGACTGGAATTCCTGGTGTAGCGGTGAAATGCGCAGATATCAGGAGGAACACCCGGTGGCGAA
GGCGGGTCTCTGGGCCGATACTGACGCTGAGGAGCGAAAGCGTGGGGAGCGAACAGGATTAGATAACCTTG
GTAGTCCACGCTGTAAACGTTGGGCGCTAGGTGTGGGGACCCCTCCTCCGGTTTTCTGCGCCGACGCTAACG
CATTAAAGCGCCCCGCCTGGGGAGTACGGCCGCAAGGCTAAAACCTCAAAGGAATTGACGGGGGCCCGCACA
AGCGGCGGAGCATGCGGATTAATTTCGATGCAACGCGAAGAACCTTACCTGGGTTTTGACATCGCCGAAAA
CTCGCAGAGATGTGGGGTCTTTCGGGGCCGGTACAGGTGGTGCATGGCTGTCTGTCAGCTCGTGTCTGTA
GATGTTGGGTTAAGTCCCGCAACGAGCGCAACCCCTCGTCCCATGTTGCCAGCATTTCAGTTGGGGACTCAT
GGGAGACTGCCGGGGTCAACTCGGAGGAAGGTGGGGATGACGTCAAGTCATCATGCCCCTTATGTCCAGG
GCTTCACGCATGCTACAATGGCCGGTACAAAGGGCTGCGATACCGTGAGGTGGAGCGAATCCCAAAAAGC
CGGTCTCAGTTCGGATCGGGTCTGCAACTCGACCCCGTGAAGTCGGAGTCGCTAGTAATCGCAGATCAG
CAACGCTGCGGTGAATACGTTCCCGGGCCTTGTACACACCGCCCCGTACGTCACGAAAGTCGGCAACACC
CGAAGCCGGTGGCCTAACCCCTTGTGGGAGGGAGCCGTGCAAGGTGGGGCTGGCGATTGGGACGAAGTCG
TAACAAGGTAGCCGTACCGGAAGGTGCGGCTGGATCACCTCCTTTC
>gb|CP003170.1|:569506-571009 Actinoplanes sp. SE50/110, complete
genome
AGAGTTTGTATCCTGGCTCAGGACGAACGCTGGCGGCGTGCTTAAACACATGCAAGTCGAGCGGAAAGGCC
TTCGGGGTACTCGAGCGGCGAACGGGTGAGTAACACGTGAGTAACCTGCCCCAGACTTTGGGATAACCCCT
CGGAAACGGGGGCTAATACCGAATATGACCTAGCTTCGCATGGAGCGTGGTGGAAAGTTTTTTCGGTTTGG
```

GATGGACTCGCGCCTATCAGCTTGTGGTGGGGTAATGGCCTACCAAGGCGACGACGGGTAGCCGGCCT  
GAGAGGGCGACCGCCACACTGGGACTGAGACACGGCCAGACTCCTACGGGAGGCAGCAGTGGGGAATA  
TTGCACAATGGGCGGAAGCCTGATGCAGCGACGCCGCTGAGGGATGACGGCCTTCGGGTGTAAACCTC  
TTTCAGCAGGGACGAAGCGCAAGTGACGGTACCTGCAGAAGAAGCGCCGGCCAACCTACGTGCCAGCAGCC  
GCGGTAAGACGTAGGGCGCGAGCGTTGTCCGGATTTATTGGGCGTAAAGAGCTCGTAGGCCGGCTTGTTCGC  
GTCGAATGTGAAATCCCAGGCTCAACTTCGGGCTTGCATTTCGATACGGGCAGGCTAGAGTTCGGTAGGG  
GAGACTGGAATTCCTGGTGTAGCGGTGAAATGCGCAGATATCAGGAGGAACACCGGTGGCGAAGCGGGT  
CTCTGGGCCGATACTGACGCTGAGGAGCGAAAGCGTGGGGAGCGAACAGGATTAGATACCTGGTAGTCC  
ACGCTGTAAACGTTGGGCGCTAGGTGTGGGGGGCCTCTCCGGTTTCCTGCGCCGAGCTAACGCATTAAG  
CGCCCCGCTGGGGAGTACGGCCGCAAGGCTAAAACCTCAAAGGAATTGACGGGGGGCCGCACAAGCGGCG  
GAGCATGCGGATTAATTCGATGCAACGCGAAGAACCTTACCTGGGTTTGACATCGCCGGAAATCTCGCAG  
AGATGCGGGGTCCTTCGGGGCCGGTGACAGGTGGTGCATGGCTGTCGTGAGCTCGTGTGAGATGTTG  
GGTTAAGTCCCGCAACGAGCGCAACCTCGTTCGATGTTGCCAGCGCGTAATGGCGGGGACTCATCGGAG  
ACTGCCGGGGTCAACTCGGAGGAAGGTGGGGATGACGTCAAGTCATCATGCCCTTATGTCCAGGGCTTC  
ACGCATGCTACAATGGCCGGTACAAAAGGGCTGCGATACCGTAAGGTGGAGCGAATCCCAAAAAGCCGGTC  
TCAGTTCGGATCGGGGTCTGCAACTCGACCCCGTGAAGTTCGGAGTCGCTAGTAATCGCAGATCAGCAACG  
CTGCGGTGAAATACGTTCCCAGGCTTGTACACACCGCCGTCACGTACGAAAGTTCGGCAACACCCGAAG  
CCGGTGGCCTAACCCGTAAGGGAGGGAGCCGTCGAAGGTGGGGCTGGCGATTGGGACGAAGTCGTAACAA  
GGTAGCCGTACCGGAAGGTGCGGCTGGATCACCT

>gi|860736|emb|x84447.1| Actinosynnema mirum 16S rRNA gene, strain DSM  
43827T

TGGCGGCGTGCTTAACACATGCAAGTCGAGCGGTAAGGCCCTTCGGGGTACACGAGCGGCGAACGGGTGA  
GTAACACGTGGGTAACCTGCCCTGTACTCTGGGATAAGCCTGGGAAACTAGGTCTAATACCGGATACGAG  
CCTTCCNCATGGGGTTGGTTGGAAAAGTTCGGGCGGTACAGGATGGACCCGCGGCCTATCAGCTTGTGG  
TGGGGTAATGGCCTACCAAGGCGACGACGGGTAGCCGGCCTGAGAGGGTGACCGGCCACACTGGGACTGA  
GACACGGCCCAGACTCCTACGGGAGGCAGCAGTGGGGAATATTGCACAATGGGCGAAAAGCCTGATGCAGC  
GACGCCGCGTGAGGGACGACGGCCTTCGGGTGTAAACCTCTTTCAGCAGGGACGAAGCGCAAGTGACGG  
TAGGTGCAGAAGAAGCACCGGCTAACTACGTGCCAGCAGCCGCGGTAATACGTAGGGTGCAGCGGTTGTC  
CGGAATTATTGGGCGTAAAGAGCTCGTAGGCCGTTTGTTCGCGTTCGGCCGTGAAAACCTTGGGGCTTAACCC  
CGAGCCTGCGGTGATACGGGCAGACTTGAGTTCGGCAGGGGAGACTGGAATTCCTGGTGTAGCGGTGAA  
ATGCGCAGATATCAGGAGGAACACCGGTGGCGAAGGCGGGTCTCTGGGCCGATACTGACGCTGAGGAGCG  
AAAGCGTGGGGAGCGAACAGGATTAGATACCCTGGTAGTCCACGCCGTAAACGGTGGGTGCTAGGTGTGG  
GGGACTTCCACGTCCTCCGTGCCGAGCTAACGCATTAAGCACCCCGCCTGGGGAGTACGGCCGCAAGGC  
TAAAACCTCAAAGGAATTGACGGGGGGCCGCACAAGCGGCGGAGCATGTGGATTAATTCGATGCAACGCGA  
AGAACCTTACCTGGGCTTGACATGCACTGGAAACCAGTAGAGATATTGGCCCCCTTGTGGCCGGTGTACA  
GGTGGTGCATGGCTGTGCTGAGCTCGTGTGCGTGTGAGATGTTGGGTTAAGTCCCGCAACGAGCGCAACCCCTC  
GTTCCATGTTGCCAGCGGTTATGGCGGGGACTCATGGGAGACTGCCGGGTCAACTCGGAGGAAGGTGG  
GGATGACGTCAAGTCATCATGCCCCCTTATGTCCAGGGCTTACACATGCTACAATGGCCGGTACAAAGGG  
CTGCTAAGCCGTGAGGTGGAGCGAATCCATAAAGCCGGTCTCAGTTCGGATCGGGGTCTGCAACTCGAC  
CCCGTGAAGTTCGGAGTTCGTAGTAATCGCAGATCAGCAACGCTGCGGTGAATACGTTCCCGGGCCTTGT  
CACACCGCCCGTACGTCACGAAAGTCGGTAACACCCGAAGCCCGTGGCCCAACCCGCAAGGGGGGAGC  
GGTCAAGGTGGGACTGGCGATTGGGACGAAGTCGTAACAAGGTAGCCGTACCGGAAGGT

>gi|399533820:1303703-1305161 Amycolatopsis mediterranei S699  
chromosome, complete genome

CTGGCTCAGGACGAACGCTGGCGGCGTGTAAACACATGCAAGTCGAACGATGAAGCCTTCGGGTGGATT  
AGTGGCGAACGGGTGAGTAACACGCTGGGTAATCTGCCCTGCACTCTGGGATAAGCCTTGGAAACGGGGTC  
TAATACCGGATATACAATCTCTCGCATGGGGGTTGTTGAAAGTTCGGCGGTGCAGGATGAACCCGCG  
GCCTATCAGCTTGTGGTGGGGTAGTGGCCTACCAAGGCGACGACGGGTAGCCGGCCTGAGAGGGTACC  
GGCCACACTGGGACTGAGACACGGCCCAGACTCCTACGGGAGGCAGCAGTGGGGAATATTGCACAATGGG  
CGCAAGCCTGATGCAGCGACGCCGCGTGGGGATGACGGCCTTCGGGTGTAAACCTCTTTCGCCAGGGA  
CGAAGCCTGATGCAGCGACGCCGCGTGGGGATGACGGCCTTCGGGTGTAAACCTCTTTCGCCAGGGA  
CGAAGCCTGATGCAGCGACGCCGCGTGGGGATGACGGCCTTCGGGTGTAAACCTCTTTCGCCAGGGA  
AGGGTGCAGCGGTTGTCCGGATTTATTGGGCGTAAAGAGCTCGTAGGCCGTTTGTTCGCGTTCGGCCGTGAA  
ATCTCCACGCTTAACGTGGAGCGTGCAGTGCATACGGGCAGACTTGAGTTCGGTAGGGGAGACTGGAATT  
CCTGGTGTAGCGGTGAAATGCGCAGATATCAGGAGGAACACCGGTGGCGAAGGCGGGTCTCTGGCCGAT  
ACTGACGCTGAGGAGCGAAAGCGTGGGGAGCGAACAGGATTAGATACCCTGGTAGTCCACGCTGTAAACG  
TTGGGCGCTAGGTGTGGGCGACATCCACGTTGTCCGTGCCGTAGCTAACGCATTAAGCGCCCCGCTGGG  
GAGTACGGCCGCAAGGCTAAAACCTCAAAGGAATTGACGGGGGGCCGCACAAGCGGCGGAGCATGTGGATT  
AATTCGATGCAACGCGAAGAACCTTACCTGGGCTTGACATGCGCCAGACATCCTCAGAGATGGGGCTTCC

CTTGTGGTTGGTGTACAGGTGGTGCATGGCTGTCGTGAGCTCGTGTGAGATGTTGGGTTAAGTCCCG  
CAACGAGCGCAACCCTTATCCTACGTTGCCAGCGCGTGATGGCGGGGACTCGTGGGAGACTGCCGGGGTGC  
AACTCGGAGGAAGGTGGGGATGACGTCAAGTCATCATGCCCTTATGTCCAGGGCTTACACATGCTACA  
ATGGCTGGTACAGAGGGCTGCGATACCGCGAGGTGGAGCGAATCCCTTAAAGCCGGTCTCAGTTCGGATC  
GCAGTCTGCAACTCGACTGCGTGAAGTCGGAGTCGCTAGTAATCGCAGATCAGCAACGCTGCGGTGAATA  
CGTTCCCGGGCCTTGTACACACCGCCCGTACGTCATGAAAGTCGGTAACACCCGAAGCCCATGGCCCAA  
CCCCGTAAGGGGAGGGAGTGGTGAAGGTGGGACTGGCGATTGGGACGAAGTCGTAACA

>gb|CP002000.1|:2307316-2308774 *Amycolatopsis mediterranei* U32,  
complete genome

CTGGCTCAGGACGAACGCTGGCGGCGTGCTTAAACACATGCAAGTCGAACGATGAAGCCTTCGGGTGGATT  
AGTGGCGAACGGGTGAGTAACACGTGGGTAATCTGCCCTGCACTCTGGGATAAGCCTTGAAACGGGGTGC  
TAATACCGGATATCAAACTCTCTCGCATGGGGGTTGTTGAAAGTCTGGCGGTGCAGGATGAACCCGCG  
GCCTATCAGCTTGTGGTGGGGTAGTGGCCTACCAAGGCGACGACGGGTAGCCGGCCTGAGAGGGTACC  
GGCCACACTGGGACTGAGACACGGCCAGACTCCTACGGGAGGCAGCAGTGGGGAATATTGCACAATGGG  
CGCAAGCCTGATGCAGCGACGCCGCGTGAGGGATGACGGCCTTCGGGTTGTAAACCTCTTTTCGCCAGGGA  
CGAAGCGCAAGTGACGGTACCTGGATAAGAAGCACCGGCTAACTACGTGCCAGCAGCCGCGGTAATACGT  
AGGGTGCAGCGTGTTCGGATTTATTGGGCGTAAAGAGCTCGTAGGCGGTTTGTTCGCGTTCGGCCGTGAA  
ATCTCCACGCTTAACTGGAGCGTGCAGTGCAGTGCAGGAGGACACTTGGGTTTCGGTAGGGGAGACTGGAATT  
CCTGGTGTAGCGGTGAAATGCGCAGATATCAGGAGGAACACCGGTGGCGAAGGCGGGTCTCTGGGCCGAT  
ACTGACGCTGAGGAGCGAAAGCGTGGGGAGCGAACAGGATTAGATAACCTGGTAGTCCACGCTGTAAACG  
TTGGGCGCTAGGTGTGGGCGACATCCACGTTGTCCGTGCCGTAGCTAACGCATTAAGCGCCCCGCTGGG  
GAGTACGGCCGCAAGGCTAAAACCTCAAAGGAATTGACGGGGGCCCCGCACAAGCGGGCGGAGCATGTGGATT  
AATTCGATGCAACGCGAAGAACCTTACCTGGGCTTGACATGCGCCAGACATCCTCAGAGATGGGGCTTCC  
CTTGTGGTTGGTGTACAGGTGGTGCATGGCTGTCGTGAGCTCGTGTGAGATGTTGGGTTAAGTCCCG  
CAACGAGCGCAACCCTTATCCTACGTTGCCAGCGCGTGATGGCGGGGACTCGTGGGAGACTGCCGGGGTGC  
AACTCGGAGGAAGGTGGGGATGACGTCAAGTCATCATGCCCTTATGTCCAGGGCTTACACATGCTACA  
ATGGCTGGTACAGAGGGCTGCGATACCGCGAGGTGGAGCGAATCCCTTAAAGCCGGTCTCAGTTCGGATC  
GCAGTCTGCAACTCGACTGCGTGAAGTCGGAGTCGCTAGTAATCGCAGATCAGCAACGCTGCGGTGAATA  
CGTTCCCGGGCCTTGTACACACCGCCCGTACGTCATGAAAGTCGGTAACACCCGAAGCCCATGGCCCAA  
CCTCGTAAGGGGAGGGAGTGGTGAAGGTGGGACTGGCGATTGGGACGAAGTCGTAACA

>gi|378781357:163561-165067 *Blastococcus saxobidens* DD2 complete  
genome

AGAGTTTGATCCTGGCTCAGGACGAACGCTGGCGGCGTGCTTAAACACATGCAAGTCGAACGGTGAACCTCC  
GCTTGCGGGGGATCAGTGGCGAACGGGTGAGTAACACGTGGGCAACCTGCCCTGGCTCTGGGATAACT  
CCAAGAAATGGGGCTAATACCGGATATGACCGCTGACCGCATGGTCTGGTGGTGGAAAGATTTATCGGC  
TGGGGATGGGCCCGCGCCCTATCAGCTTGTGGTGGGGTAGTGGCTACCAAGGCGACGACGGGTAGCCG  
GCCTGAGAGGGTGACCGCCACACTGGGACTGAGACACGGCCAGACTCCTACGGGAGGCAGCAGTGGGG  
AATATTGCGCAATGGGCGGAAGCCTGACGCGAGCGACGCCGCGTGGGGATGACGGCCTTCGGGTTGTAAA  
CCTCTTTCAGCAGGGACGAAGCGAGAGTGACGGTACCTGCAGAAGAAGCACCGGCAACTACGTGCCAGC  
AGCCGCGGTAATACGTAGGGTGAAGCGTGTTCGGGAATTATTGGGCGTAAAGAGCTCGTAGGCGGTTTCG  
TCGCGTTCGGCTGTGAAATCCCGAGGCTCAACCTCGGGTCTGCAGTCGATACGGGCGGACTTGAGTTCGGC  
AGGGGAGACTGGAATTCCTGGTGTAGCGGTGAAATGCGCAGATATCAGGAGGAACACCGGTGGCGAAGGC  
GGGTCTCTGGGCCGAAACTGACGCTGAGGAGCGAAAGCGTGGGGAGCGAACAGGATTAGATAACCTGGTA  
GTCACGCGCTAAACGTTGGGCGCTAGGTGTGGGGCTCATTCCACGAGTTCGGTGCAGCTAACGCAT  
TAAGCGCCCCGCTGGGAGTACGGCCGCAAGGCTAAAACCTCAAAGGAATTGACGGGGGCCCCGCACAAGC  
GGCGGAGCATGTTGCTTAATTCGATGCAACGCGAAGAACCTTACCTAGGCTTGACATGCACGAAATCCT  
CCAGAGATGGTGGGTCCGTAAGGGCCGTGCACAGGTGGTGCATGGTTGTGTCGTGAGCTCGTGTGAGAT  
GTTGGGTTAAGTCCCGCAACGAGCGCAACCTCGTTCTATGTTGCCAGCACGTCATGGTGGGACTCATA  
GGAGACTGCCGGGTCAACTCGGAGGAAGGTGGGGATGACGTCAAATCATCATGCCCTTATGTCTAGGG  
CTGCAAACATGCTACAATGGCTGGTACAAAGGGCTGCGATACCGCGAGGTGGAGCGAATCCCAAAAAGCC  
GGTCTCAGTTCGATTGGGGTCTGCAACTCGACCCCATGAAGTTGGAGTCGCTAGTAATCGCAGATCAGC  
AACGCTGCGGTGAATACGTTCCCGGGCCTTGTACACACCGCCCGTACGTCACGAAAGTCGGTAACGCC  
GAAGCCGGTGGCCCAACCTTGTGGAGGGAGCCGTGCAAGGCGGGATCGGCGATTGGGACGAAGTCGTAA  
CAAGGTAGCCGTACCGGAAGGTGCGGCTGGATCACCT

>gi|343201636|ref|NR\_042362.1| *Catenulispora acidiphila* DSM 44928  
strain : ID139908 = DSM 44928 = NRRL B-24433 16S ribosomal RNA, partial  
sequence

GACGAACGCTGGCGGCGTGCTTAAACACATGCAAGTCGAACGGTGAACCGCTTTCGGGCGGGGATCAGTGG

CGAACGGGTGAGTAACACGTGGGTAACCTGCCCTCCACTCTGGGATAACTCCGGGAAACCGGGGCTAATA  
CCGGATACGACTCGAGGCGGCATCGCCTCGGGTGGAAAGTTTTTCGGTGGAGGATGGACCCGCGGCCTAT  
CAGCTTGTGGTGGGGTAACGGCCTACCAAGGCGATGACGGGTAGCCGGCCTGAGAGGGCGACCGGCCAC  
ACTGGGACTGAGACACGGCCCAGACTCCTACGGGAGGCAGCAGTGGGGAATATTGCACAATGGGCGAAAG  
CCTGATGCAGCGACCGCCGCTGAGGGATGACGGCCTTCGGGTTGTAACCTCTTTTCAGCAGGGACGAAGC  
GCAAGTGAAGTGTACCTGCAGAAGAAGCACCGGCTAACTACGTGCCAGCAGCCGCGGTAATACGTAGGGTG  
CGAGCGTTGTCCGGAATTATTGGGCGTAAAGAGCTTGTAGGTGGCTCGTTGCGTCCGGGAGTGAAAACCCG  
CGGCTTAACCGCGGGCCTGCTTCCGATACGGGCGAGCTAGAGTTCGGCAGGGGAGACTGGAATTCCTGGT  
GTAGCGGTGGAATGCGCAGATATCAGGAGGAACACCGGTGGCGAAGGCGGGTCTCTGGGCCGATACTGAC  
ACTGAGAAGCGAAAGCGTGGGGAGCGAACAGGATTAGATACCCCTGGTAGTCCACGCCGTAAACGTTGGGA  
ACTAGGTGTGGGTCCATTCCACGGGCTCTGTGCCGAGCTAACGCATTAAGTTCCCCGCTGGGGAGTA  
CGGCCGCAAGGCTAAAACCTCAAAGGAATTGACGGGGCCCCGCACAAGCGGCGGAGCATGTGGCTTAATTC  
GATGCAACCGGAAGAACCTTACCTGGGCTTGACATGTTCCGGTCTACCTGCAGAGATGTGGGGTGTCTTTG  
CGCCGTTTACAGGTGGTGCATGGTTGTCTGCTCAGCTCGTGTCTGAGATGTTGGGTTAAGTCCCGCAACGA  
GCGCAACCCCTCGTTCCATGTTGCCAGCGCGTTATGGCGGGGACTCATGGGAGACTGCCGGGGTCAACTCG  
GAGGAAGGTGGGGACGACGTCAAATCATCATGCCCTTATGTCCAGGGCTGCACACATGCTACAATGGCC  
GGTACAGAGGGCTGCGATACCGCAAGGTGGAGCGAATCCCAAAAAGCCGGTCTCAGTTCCGGATCGGGGTC  
TGCAACTCGACCCCGTGAAGTCCGGAGTCCGTAGTAATCGCAGATCAGCAACGCTGCGGTGAATACGTTCC  
CGGGCCTTGTACACACCGCCCGTACGTCACGAAAGTCCGTAACACCCGAAGCCGGTGGCCTAACCCCTT  
GTGGGAGGGAGCCGTCAAGGTGGGACCGGCGATTGGGACG

>gb|CP002666.1|:1832187-1833696 *Cellulomonas fimi* ATCC 484, complete genome

AGAGTTTGATTCTGGCTCAGGACGAACGCTGGCGGCGTGCTTAAACACATGCAAGTCGAACGGTGATGACA  
GGGCTTGCTCTGTCTGATCAGTGGCGAACGGGTGAGTAACACGTGAGCAACCTGCCCTGACTCTGGGAT  
AACGACCGGAAACGGTTCGTAATACCGGATATGAGACGTACAGGCATCTGTTGCGTCTGGAAAAGTTTTTC  
GGTACAGGGATGGGCTCGCGGCCTATCAGCTTGTGGTGGGGTAACGGCCTACCAAGGCGACGACGGGTAG  
CCGGCCTGAGAGGGCGACCGGCCACACTGGGACTGAGACACGGCCCAGACTCCTACGGGAGGCAGCAGTG  
GGGAATATTGCACAATGGGCGAAAGCCTGATGCAGCGACGCCGCGTGGGGATGACGGCCTTCGGGTTGT  
AAACCTCTTTTCAGCAGGGAAGAAGCGCAAGTACGGTACCTGCAGAAGAAGCGCCGGCTAACTACGTGCC  
AGCAGCCGCGGTAATACGTAGGGCGCAAGCGTTGTCCGGAATTATTGGGCGTAAAGAGCTCGTAGGCGGT  
TTGTGCGCTCTGCTGTGAAAACCTCAGGCTCAACCTGGGGCTTGCAGTGGGTACGGGCAGACTAGAGTGC  
GGTAGGGGTGACTGGAATTCCTGGTGTAGCGGTGGAATGCGCAGATATCAGGAGGAACACCGATGGCGAA  
GGCAGGTCACTGGGCCGCAACTGACGCTGAGGAGCGAAAGCATGGGGAGCGAACAGGATTAGATAACCCTG  
GTAGTCCATGCCGTAAACGTTGGGCACTAGGTGTGGGGCTCATTCACGAGCTCTGTGCCGAGCAAACG  
CATTAAAGTCCCCGCTGGGGAGTACGGCCGCAAGGCTAAAACCTCAAAGAAATTGACGGGGCCCCGCACA  
AGCGGCGGAGCATGCGGATTAATTCGATGCAACGCGAAGAACCTTACCAAGGCTTGACATACACCGGAAA  
AGTGCAGAGATGTGCTCCCCGTAAGGTCCGTGTACAGGTGGTGCATGGTTGTGCTCAGCTCGTGTCTGA  
GATGTTGGGTTAAGTCCCGCAACGAGCGCAACCCTCGTCCCATGTTGCCAGCGGGTTATGCCGGGGACTC  
ATGGGAGACTGCCGGGGTCAACTCGGAGGAAGTGGGGATGACGTCAAATCATCATGCCCTTATGTCTT  
GGGCTTACGCATGCTACAATGGCCGGTACAAAGGGCTGCGATACCGCGAGGTGGAGCGAATCCCAAAA  
GCCGGTCTCAGTTCCGATTGGGGTCTGCAACTCGACCCCATGAAGTCCGAGTCCGTAGTAATCGCAGATC  
AGCAACGCTGCGGTGAATACGTTCCCGGGCCTTGTACACACCGCCCGTCAAGTACGAAAGTCCGTAACA  
CCCGAAGCCGGTGGCCCAACCCTTGTGGGGGGAGCCGTCAAGGTGGGACTGGCGATTGGGACTAAGTCCG  
TAACAAGGTAGCCGTACCGGAAGGTGCGGCTGGATCACCT

>gb|CP001964.1|:1209818-1211325 *Cellulomonas flavigena* DSM 20109, complete genome

AGAGTTTGATTCTGGCTCAGGACGAACGCTGGCGGCGTGCTTAAACACATGCAAGTCGAACGGTGAAGGTC  
AGCTTGCTGACCGGATCAGTGGCGAACGGGTGAGTAACACGTGAGCAACCTACCCTTCACTCTGGGATAA  
GCCTTGAAAACGAGGTCTAATACCGGATACGAGACGCACGGGCATCTGTAGCGTCTGGAAAAGATTTATCG  
GTGGGGGATGGGCTCGCGGCCTATCAGCTTGTGGTGGGGTAATGGCCTACCAAGGCGACGACGGGTAGC  
CGGCCTGAGAGGGCGACCGGCCACACTGGGACTGAGACACGGCCCAGACTCCTACGGGAGGCAGCAGTGG  
GGAATATTGCACAATGGGCGCAAGCCTGATGCAGCGACGCCGCGTGGGGATGACGGCCTTCGGGTTGTA  
AACCGCTTTCAGCAGGGAAGAAGCGAGAGTACGGTACCTGCAGAAGAAGCGCCGGCTAACTACGTGCCA  
GCAGCCCGGTAATACGTAGGGCGCAAGCCTTGTCCGGAATTATTGGGCGTAAAGAGCTCGTAGGCGGTT  
TGTGCGCTCTGCTGTGAAAACCTCAGGCTCAACCTGGGGCTTGCAGTGGGTACGGGCAGACTAGAGTCCG  
GTAGGGGTGACTGGAATTCCTGGTGTAGCGGTGGAATGCGCAGATATCAGGAGGAACACCGATGGCGAAG  
GCAGGTCACTGGGCCGCAACTGACGCTGAGGAGCGAAAGCATGGGGAGCGAACAGGATTAGATACCCCTGG  
TAGTCCATGCCGTAAACGTTGGGCACTAGGTGTGGGGTCCATTCCACGGATTCCGTGCCGAGCAAACGC

ATTAAGTGCCCCGCTGGGGAGTACGGCCGCAAGGCTAAAACCTCAAAGAAATTGACGGGGGCCCGCACAA  
GCGGCGGAGCATGCGGATTAATTCGATGCAACGCGAAGAACCTTACCAAGGCTTGACATACACCGGAAAC  
GTGCAGAGATGTGCGCCCCGAAGGTCGGTGTACAGGTGGTGCATGGTTGTCGTCAGCTCGTGTCTGTGAG  
ATGTTGGGTTAAGTCCCAGCAACGAGCGCAACCCCTCGTCCCATGTTGCCAGCGGGTTATGCCGGGGACTCA  
TGGGAGACTGCCGGGGTCAACTCGGAGGAAGGTGGGGATGACGTCAAATCATCATGCCCCCTTATGTCTTG  
GGCTTACGCATGCTACAATGGCCGGTACAAAGGGCTGCGATACCGCGAGGTGGAGCGAATCCCAAAAAG  
CCGGTCTCAGTTCGGATTGGGGTCTGCAACTCGACCCCATGAAGTCGGAGTCGCTAGTAATCGCAGATCA  
GCAACGCTGCGGTGAATACGTTCCCGGCCCTTGTACACACCGCCCGTCAAGTCATGAAAGTCGGTAACAC  
CCGAAGCCGATGGCCCAACCGCAAGGGGGAGTCGTGCAAGGTGGGACTGGCGATTAGGACTAAGTCGTA  
ACAAGGTAGCCGTACCGGAAGGTGCGGCTGGATCACCT

>gb|CP002665.1|:2110404-2111909 *Cellulomonas gilvus* ATCC 13127,  
complete genome

AGAGTTTGATTCTGGCTCAGGACGAACGCTGGCGGCGTGCTTAAACACATGCAAGTCGAACGGTGAAGACC  
AGCTTGCTGGTTGGATCAGTGGCGAACGGGTGAGTAACACGTGAGCAACCTGCCCCCTGACTCTGGGATAA  
GCCTTGAAAACGAGGTCTAATACCGGATATGACACTGTACGCATGTGGTGGTGTGGAAAAGAAATTCGGT  
TGGGGATGGGCTCGCGGCCCTATCAGCTTGTGGTGGGGTGTGATGGCCTACCAAGGCGACGACGGGTAGCCG  
GCCTGAGAGGGCGACCGGCCACACTGGGACTGAGACACGGCCAGACTCCTACGGGAGGCAGCAGTGGGG  
AATATTGCACAATGGGCGCAAGCCTGATGCAGCGACGCCGCTGAGGGATGACGGCCTTCGGGTTGTA  
CCTCTTTCAGCAGGGAAGAAGCGAAAAGTGACGGTACCTGCAGAAAGAAGCGCCGGCTAACTACGTGCCAGC  
AGCCCGGTGATACGTAGGGCGCAAGCCTTGTCCGGAATTATTGGGCGTAAAGAGCTCGTAGGCGGTGAG  
TCGCGTCTGCTGTGAAAACCTCGAGGCTCAACCTCGGGCTTGCAGTGGGTACGGGCTGACTAGAGTGC  
AGGGGTGACCGGAATTCCTGGTGTAGCGGTGGAATGCGCAGATATCAGGAGGAACACCGATGGCGAAGGC  
AGGTCACTGGGCCGCAACTGACGCTGAGGAGCGAAAGCATGGGGAGCGAACAGGATTAGATACCTGGTA  
GTCCATGCCGTAACGTTGGGCACTAGGTGTGGGGTCCATTCCACGGATTCCGTGCCGAGCTAACGCAT  
TAAGTGCCCCGCTGGGGAGTACGGCCGCAAGGCTAAAACCTCAAAGAAATTGACGGGGGCCCGCACAAAGC  
GGCGGAGCATGCGGATTAATTCGATGCAACGCGAAGAACCTTACCAAGGCTTGACATACACCGGAAAAGT  
GCAGAGATGTGCTCCCCGTAAGGTCGGTGTACAGGTGGTGCATGGTTGTCGTCAGCTCGTGTCTGTGAGAT  
GTTGGGTTAAGTCCCAGCAACGAGCGCAACCCCTCGTCCCATGTTGCCAGCGGGTTATGCCGGGGACTCATG  
GGAGACTGCCGGGGTCAACTCGGAGGAAGGTGGGGATGACGTCAAATCATCATGCCCCCTTATGTCTTGGG  
CTTACGCATGCTACAATGGCCGGTACAAAGGGCTGCGATACCGTAAGGTGGAGCGAATCCCAAAAAGCC  
GGTCTCAGTTCGGATTGGGGTCTGCAACTCGACCCCATGAAGTCGGAGTCGCTAGTAATCGCAGATCAGC  
AACGCTGCGGTGAATACGTTCCCGGCCCTTGTACACACCGCCCGTCAAGTCACGAAAGTCGGTAACACCC  
GAAGCCGGTGGCCCAACCTTTTGGGGGGAGCCGTGCAAGGTGGGACTGGCGATTGGGACTAAGTCGTAAC  
AAGGTAGCCGTACCGGAAGGTGCGGCTGGATCACCT

>gi|111147037:5633232-5634741 *Frankia alni* str. ACN14A chromosome,  
complete sequence

TTGATGGAGAGTTTGATCCTGGCTCAGGACGAACGCTGGCGGCGTGCTTAAACACATGCAAGTCGAGCGAG  
GGGCTTCGGCTCCTAGCGGCGAACGGGTGAGTAACACGTGGGCAACCTGCCCCGAGCTCTGGAATAACCT  
CGGGAACCGGGGCTAATGCCGATATGACGCTACCGGGCATCTGGTGGTGTGGAAAGATTTATCGGCTC  
GGGATGGGCCCGCGCCCTATCAGCTTGTGGTGGGGTGTGATGGCCTACCAAGGCGACGACGGGTAGCCGGC  
CTGAGAGGGCGACCGGCCACACTGGGACTGAGACACGGCCAGACTCCTACGGGAGGCAGCAGTGGGGAA  
TATTGCGCAATGGGCGAAAGCCTGACGCAGCGACGCCGCTGGGGGATGACGGCCTTCGGGTTGTAAACC  
TCTTTCAGCAGGGACGAAGCGCAAGTGACGGTACCTGCAGAAAGAAGCACCGGCCAACTACGTGCCAGCAG  
CCGCGGTAATACGTAGGGTGCAAGCCTTGTCCGGAATTATTGGGCGTAAAGAGCTCGTAGGCGGCCTGT  
CGCTCGGCTGTGAAAACCGGGGCTCAACCCGGGCTGCAGTCGATACGGGCAGGCTAGAGTCCGGCAG  
GGGAGACTGGAATTCCTGGTGTAGCGGTGAAATGCGCAGATATCAGGAGGAACACCGGTGGCGAAGGCGG  
GTCTCTGGGCCGGAACCTGACGCTAAGGAGCGAAAGCCTGGGGAGCGAACAGGATTAGATACCTGGTAGT  
CCACGCCGTAAACGTTGGGCGCTAGGTGTGGGGGACCTCCACGGCCTCCGTGCCGAGCTAACGCATTA  
AGCGCCCCCTGGGGAGTACGGCCGCAAGGCTAAAACCTCAAAGGAATTGACGGGGGCCCGCACAAAGCGG  
CGGAGCATGTGGCTTAATTCGATGCAACGCGAAGAACCTTACCAGGGCTTGACATGCAGGGAAATCTCGT  
AGAGATACGGGGTCCGTAAGGGTCTGACAGGTGGTGCATGGCTGTCTGTCAGCTCGTGTCTGTGAGATGT  
TGGGTTAAGTCCCAGCAACGAGCGCAACCCCTCGTCCATGTTGCCAGCGAGTTATGTGCGGGACTCATAGG  
AGACTGCCGGGGTCAACTCGGAGGAAGGTGGGGATGACGTCAAGTCATCATGCCCCCTTACGTCTGGGCT  
GCACACATGCTACAATGGCCGGTACAAAGGGCTGCGATACCGTGAGGTGGAGCGAATCCCAAAAAGCCGG  
TCTCAGTTCGGATCGGGTCTGCAACTCGACCCCGTGAAGTCGGAGTCGCTAGTAATCGCAGATCAGCAA  
TGCTGCGGTGAATACGTTCCCGGCCCTTGTACACACCGCCCGTACGTCACGAAAGTCGGTAACACCCGA  
AGCCGGTGGCCTAACCTTGTGGGGGGAGCCGTGCAAGGTGGGACCGGCGATTGGGACGAAGTCGTAACA  
AGGTAGCCGTACCGGAAGGTGCGGCTGGATCACCTCCTTT



>gb|CP000249.1|:3751629-3753140 Frankia sp. CcI3, complete genome  
TTGATGGAGAGTTTGGATCCTGGCTCAGGACGAACGCTGGCGGCGTGCTTAACACATGCAAGTCGAGCGGG  
GAGCTTCGGCTCTCAGCGGCGAACGGGTGAGTAACACGTGGGCAACCTGCCCCGAGCTCTGGAATAACCT  
CGGGAAACCGGGGCTAATGCCGGATATGACATTGCCGGGCATCTGGTGGTGTGGAAAGATTTATCGGCTC  
GGGATGGGCCCGCGGCTATCAGCTTGTGGTGGGGTGGATGGCCTACCAAGGCGACGACGGGTAGCCGGC  
CTGAGAGGGCGACCGGCCACACTGGGACTGAGACACGGCCAGACTCCTACGGGAGGCAGCAGTGGGGAA  
TATTGCGCAATGGGCGGAAGCCTGACGCAGCGACGCCGCGTGGGGGATGACGGCCTTCGGGTTGTAAACC  
TCTTTCAGCAGGGACGAAGCGAGAGTGACGGTACCTGCAGAAGAAGCACCGGCCAACTACGTGCCAGCAG  
CCGCGGTAATACGTAGGATGCAAGCGTTGTCCGGAATTATTGGGCGTAAAGAGCTCGTAGGCGGCCTGTT  
GCGTCGGCTGTGAAAACCCGGGGCTCAACTCCGGGCCTGCAGTCGATACGGGCAGGCTAGAGTCCGGCAG  
GGGAGACTGGAATTCCTGGTGTAGCGGTGAAATGCGCAGATATCAGGAGGAACACCGGTGGCGAAGGCGG  
GTCTCTGGGCCGGAACCTGACGCTAAGGAGCGAAAGCGTGGGGAGCGAACAGGATTAGATAACCTGGTAGT  
CCACGCCGTAACGTTGGGCGCTAGGTGTGGGGGACCTTCCACGGCCTCCGTGCCCGCAGCTAACGCATTA  
AGCGCCCCGCTGGGGAGTACGGCCGCAAGGCTAAAACCTCAAAGGAATTGACGGGGGCCCCGACAAGCGG  
CGGAGCATGTGGCTTAATTCGATGCAACGCGAAGAACCTTACCAGGGCTTGACATGCAGGGAAATCTCGT  
AGAGATACGGGGTCCGTAAGGGTCTTCGACAGGTGGTGCATGGCTGTCTGTCAGCTCGTGTCTGTGAGATGT  
TGGGTAAAGTCCCGCAACGAGCGCAACCTCGTCTATGTTGCCAGCGAGTCGTGTCTGGGGACTCATAGG  
AGACTGCCGGGGTCAACTCGGAGGAAGGTGGGGATGACGTCAAGTCATCATGCCCTTACGTCTGGGGCT  
GCACACATGCTACAATGGCCGGTACAAAGGGCTGCGATGCCGTGAGGTGGAGCGAATCCAAAAAGCCGG  
TCTCAGTTCGGATCGGGGTCTGCAACTCGACCCCGTGAAGTTCGGAGTCGCTAGTAATCGCAGATCAGCAA  
TGCTGCGGTGAATACGTTCCCGGGCCTTGTACACACCGCCGTCACGTCACGAAAGTTCGGTAACACCCGA  
AGCCGGTGGCCTAACCTTGTGGGGGAGCCGTGCAAGGTGGGACCGGCGATTGGGACGAAGTCTGTAACA  
AGGTAGCCGTACCGGAAGGTGCGGCTGGATCACCTCCTTTCT

>gi|261824163|gb|GQ891665.1| Frankia sp. CN3 16S ribosomal RNA gene,  
partial sequence; 16S-23S ribosomal RNA intergenic spacer, complete  
sequence; and 23S ribosomal RNA gene, partial sequence  
CTTGTCTATGTTGCCAGCGGTTATGGGCGGGGACTCATAACAAGACTGCCGGGGTCAACTCGGAGGAAG  
GTGGGGATGACGTCAAGTCATCATGCCCTTACGTCTGGGCTGCACACATGCTACAATGGCCGGTACAA  
TGGGCTGCGATACCGCGAGGTGGAGCGAATCCAAAAAGCCGGTCTCAGTTCGGATCGGGGTCTGCAACT  
CGACCCCGTGAAGTTCGGAGTTCGCTAGTAATCGCAGATCAGCATTGTCTGCGGTGAATACGTTCCCGGGCCT  
TGTACACACCGCCCGTACGTCATGAAAGTTCGGTAACACCCGAAGCCGGTGGCCTAACCTTGTGGAGGG  
AGCCGTGCAAGGTGGGACCGGCGATTAGGACGAAGTCGTAACAAGGTAAACCGTACCGGAAGGTGCGGCTG  
GATCACCTCCTTTCTAAGGAGCTTCTCACGGAGTTGTCCGTGGGGCCGGTTCCTCGGCTGTGCATGCCGG  
CTGGTTTGTCTCAGTGGCGTGAATGCTGACTTCAGAGGCTGTTTTTCGGCTGGTTCGGTGGCTAGTACTC  
TCTGCTCTTCGGGTGGGGGTGGAACGGGCTGGCTGGTTCGGGGATGGTTTTCTGTGTGGCGGCTGTTGGGT  
CCTGAGGGAGCGAAATCGTTTCTTCGGTGGCCATCGACCCCGGGTCTCCCTTTTGGGGAGGGTTCGGGG  
GGTTGGCTGCGGTACGGACCAGTCTTCTAGACATCGGCCCTGTGGGGGTGTGGTACCCCTAGGGGTT  
GGGGTTCGTTCTTTGAGAACTGCACAGTGGACGCGAGCATCTGTGTGGCCAAGTTAGTAAGGGCAC

>gb|CP000820.1|:1274937-1276437 Frankia sp. EAN1pec, complete genome  
AGAGTTTGGATCCTGGCTCAGGACGAACGCTGGCGGCGTGCTTAACACATGCAAGTCGAGCGAGGAGCTTG  
CTCCTAGCGGCGAACGGGTGAGTAACACGTGGGCAACCTGCCCAAGCTCTGGAATAACTCCGGGAAACC  
GGGGCTAATGCCGGATATGACATCATCGGGCATCTGGTGTATGTGGAAAGATTTATCGGCTTGGGATGGGC  
CCGCGGCTATCAGCTTGTGGTGGGGTGGATGGCCTACCAAGGCGACGACGGGTAGCCGGCCTGAGAGGG  
CGATCGGCCACACTGGGACTGAGACACGGCCAGACTCCTACGGGAGGCAGCAGTGGGGAATATTGCGCA  
ATGGGCGAAAGCCTGACGCAGCGACGCCGCGTGGGGATGACGGCCTTCGGGTTGTAAACCTCTTTTCAGC  
AGGGACGAAGCGAGAGTACGGTACCTGCAGAAGAAGCACCGGCAACTACGTGCCCAGCAGCCGCGGTAA  
TACGTAGGGTGCAGCGTTGTCCGGAATTATTGGGCGTAAAGAGCTCGTAGGCGGCTGTGCGCTCGGCT  
GTGAAAACCCGGGGCTCAACCCCGGGCTGCAGTCGATACGGGCAGGCTAGAGTCCGGTAGGGGAGACTG  
GAATTCCTGGTGTAGCGGTGAAATGCGCAGATATCAGGAGGAACACCGGTGGCGAAGGCGGGTCTCTGGG  
CCGGAACCTGACGCTAAGGAGCGAAAGCCTGGGGAGCGAACAGGATTAGATAACCTGGTAGTCCACGCCGT  
AAACGTTGGGCGCTAGGTGTGGGGGACCTTCCACGGCCTCCGTGCCGAGCTAACGCATTAAGCGCCCCG  
CCTGGGGAGTACGGCCGCAAGGCTAAAACCTCAAAGGAATTGACGGGGGCCCCGACAAGCGGCGGAGCATG  
TGGCTTAATTCGATGCAACGCGAAGAACCCTTACCAGGGCTTGACATGCAGAGAAATCCTGTAGAGATATG  
GGGTCTTATGGGGCTCTGCACAGGTGGTGCATGGCTGTCTGTCAGCTCGTGTCTGTGAGATGTTGGGTTAAG  
TCCCGCAACGAGCGCAACCCTTGTCTATGTTGCCAGCGAGTCATGTGGGGACTCATAGGAGACTGCCG  
GGGTCAACTCGGAGGAAGGTGGGGATGACGTCAAGTCATCATGCCCTTACGTCTGGGCTGCACACATG  
CTACAATGGCCGGTACAATGGGCTGCGATACCGCGAGGTGGAGCGAATCCAAAAAGCCGGTCTCAGTTC  
GGATCGGGGTCTGCAACTCGACCCCGTGAAGTTCGGAGTCGCTAGTAATCGCAGATCAGCAATGCTGCGGT

GAATACGTTCCCGGGCCTTGTACACACCGCCCGTCACGTCACGAAAGTCGGTAACACCCGAAGCCGGTGG  
CCCAACCCCTTGTGGGGGAGCCGTCGAAGGTGGGACCGGCGATTGGGACGAAGTCGTAACAAGGTAGCCG  
TACCGGAAGGTGCGGCTGGATCACCTCCTTT

>gi|261824138|gb|GQ891640.1| Frankia sp. EUN1f 16S ribosomal RNA gene,  
partial sequence; 16S-23S ribosomal RNA intergenic spacer, complete  
sequence; and 23S ribosomal RNA gene, partial sequence

CTTGTCTATGTTGCCAGCGCCTTATGGCGGGGACTCATAGGAGACTGCCGGGGTCAACTCGGAGGAAGG  
TGGGGATGACGTCAAGTCATCATGCCCCTTACGTCCTGGGCTGCACACATGCTACAATGGCCGGTACAAA  
GGGCTGCGATGCCGTGAGGTGGAGCGAATCCCAAAAAGCCGGTCTCAGTTCGGATCGGGGTCTGCAACTC  
GACCCCGTGAAGTCGGAGTCGCTAGTAATCGCAGATCAGCAATGCTGCGGTGAATACGTTCCCGGGCCTT  
GTACACACCGCCCGTCACGTCACGAAAGTCGGTAACACCCGAAGCCGGTGGCCCAACCCCTTGTGGGGGA  
GCCGTGCAAGGTGGGACCGGCGATTGGGACGAAGTCGTAACAAGGTAGCCGTACCGGAAGGTGCGGCTGG  
ATCACCTCCTTTCTAAGGAGCTTTCTGGCTGGTGGCTTCTGTAGTGGGGGGTTACTGGTCCAGGGCGAA  
GGCCGGTTCGAGTGGCTGGTCTGGCGTGCTCATGGGTGTGGAACGCTGACTTGTCTGCCGGTGGTCTG  
GTGCTCTGGGTTCTGTGTGTTCTGGGGTTGGGCTTTCTGAAATGATCGGTACGCTGTTGGGTTTTGAG  
GGAGTGTGATGCCCTCGTGTACGTCCTTGCCCTGTCAGCCTGTTGGCTGCCGGGGTGGGTGTGCGGGCTG  
GTTCTGTCGGGATACCGCCATCCGTGTGGGGTGGTGGTCTCGTGGGGCGTGACTGGTTTTCCGTTTCGTAG  
TTTGAGAACTGCACAGTGGACGCGAGCATCTTTATCTTTGTGGCCAAGTTATTAAGGGCGC

>gb|CP002801.1|:2958590-2960087 Frankia symbiont of Datisca glomerata,  
complete genome

AGAGTTTGATCCTGGCTCAGGACGAACGCTGGCGGCGTGCTTAACACATGCAAGTCGAGCGGGGGACTTC  
GGTCTTCAGCGGCGAACGGGTGAGTAACACGTCGGGCAACCTGCCCGAGCTCTGGGATAACTTCGGGAAA  
CCGGGGCTAATACCGGATATGACATTGCCGGGCATCTGGTGGTGTGGAAGATTTATCGGCTCGGGATGG  
GCCCGCGGCTATCAGCTTGTGGTGGGGTGTGGCCTACCAAGGCGACGACGGGTAGCCGGCCTGAGAG  
GGCGATCGGCCACACTGGGACTGAGACACGGCCAGACTCCTACGGGAGGCAGCAGTGGGGAATATTGCG  
CAATGGGCGGAAGCCTGACGCAGCGACGCCGCGTGGGGGATGACGGCCTTCGGGTTGTAACCTCTTTCA  
GCAGGGACGAAGCGAAAGTGACGGTACCTGCAGAAGAAGCACCGGCCAACTACGTGCCAGCAGCCGCGGT  
AATACGTAGGGTGAAGCGTTGTCCGGAATTATTGGGCGTAAAGAGCTCGTAGGCGGCTTGTACGTCGG  
CTGTGAAATCCCGGGGCTCAACTCCGGGCGTGCAGTCGATACGGGCAGGCTAGAGTCCGGCAGGGGAGAC  
TGGAATTCCTGGTGTAGCGGTGAAATGCGCAGATATCAGGAGGAACACCGGTGGCGAAGGCGGGTCTCTG  
GGCCGGTACTGACGCTAAGGAGCGAAAGCGTGGGGAGCGAACAGGATTAGATACCCTGGTAGTCCACGCC  
GTAAACGTTGGGCGCTAGGTGTGGGGGACCTTCCACGGCCTCCGTGCCGAGCTAACGCATTAAGCGCCC  
CGCCTGGGGAGTACGGCCGCAAGGCTAAAACCTCAAAGGAATTGACGGGGGCCCGCACAAGCGGCGGAGCA  
TGTGGCTTAATTCGATGCAACGCGAAGAACCCTTACCAAGGCTTGACATGCAGGGAAATCTCGTAGAGATA  
CGGGGTCCGTAAGGGCTCTGCACAGGTGGTGCATGGCTGTCTGTCAGCTCGTGTCTGTGAGATGTTGGGTTA  
AGTCCCAGCAACGAGCGCAACCCTCGTCTATGTTGCCAGCGAGTAATGTCGGGGACTCATAGGAGACTGC  
CGGGGTCAACTCGGAGGAAGGTGGGGATGACGTCAAGTCATCATGCCCCTTACGTCTTGGGCTGCACACA  
TGCTACAATGGCCGGTACAAAGGGCTGCGATGCCGTGAGGTGGAGCGAATCCCAAAAAGCCGGTCTCAGT  
TCGGATCGGGTCTGCAACTCGACCCCGTGAAGTCGGAGTCGCTAGTAATCGCAGATCAGCAATGCTGCG  
GTGAATACGTTCCCGGGCCTTGTACACACCGCCCGTCACGTCACGAAAGTCGGTAACACCCGAAGCCGGT  
GGCCCAACCCCTTGTGGGGGAGCCGTCGAAGGTGGGACCGGCGATTGGGACGAAGTCGTAACAAGGTAGC  
CGTACCGGAAGGTGCGGCTGGATCACCT

>gi|228721038|ref|NR\_027601.1| Geodermatophilus obscurus DSM 43160 16S  
ribosomal RNA, partial sequence

TGATCCTGGCTCAGGACGAACGCTGGCGGCGTGCTTAACACATGCAAGTCGGACGGTGAACCTGCTTCGG  
GTGGGGGATCAGTGCCGAACGGGTGAGTAACACGTCGGCCTAACCTGCCCGGCTCTGGGATAACTCCAAG  
AAATTGGGGCTAATACCGGATGTGACCGCTGCCCGCATGGTCTGGTGGTGGAAAGGGTTTCCGGCTGGGG  
ATGGACCCCGCGCCTATCAGCTTGTGGTGGGGTGTGGCCTACCAAGGCGACGACGGGTAGCCGGCCTG  
AGAGGGTGACCGCCAGACTGGGACTGAGACACGGCCAGACTCCTACGGGAGGCAGCAGTGGGGAATAT  
TGCACAATGGGCGGAAGCCTGACGCAGCGACGCCGCGTGGGGGATGACGGCCTTCGGGTTGTAACCTCT  
TTCAGCAGGGACGAAGCCGTGAGGTGACGGTACCTGCAGAAGAAGCACCGGCCAACTACGTGCCAGCAGC  
CGCGGTAATACGTAGGGTGAAGCGTTGTCCGGAATTATTGGGCGTAAAGAGCTCGTAGGCGGTTGGTTCG  
CGTCCGCTGTGAAAACCCGGAGATCAACTCCGGGCTGCAGTCGATACGGGCCGACTTGAGTGTGTAGG  
GGAGACTGGAATTCCTGGTGTAGCGGTGAAATGCGCAGATATCAGGAGGAACACCGGTGGCGAAGGCGGG  
TCTCTGGGCAACAACCTGACGCTGAGGAGCGAAAGCGTGGGGAGCGAACAGGATTAGATACCCTGGTAGTC  
CACGCCGCAAACGTTGGGCGCTAGGTGTGGGGCCATTCCACGGTCTCCGTGCCGAGATAACGCATTAA  
GCGCCCCGCTGGGGAGTACGGCCGAAGGCTAAAACCTCAAAGGAATTGACGGGGGCCCGCACAAGCGGC  
GGAGCATGTTGCTTACTTCGATGCAACGCGAAGAACCCTTACCTAGGCTTGACATGCACGGAAATCTCGCA

GAGATGCGGGTCCGCAAGGGCCGTGCACAGGTGGTGCATAGTTGTCGCCAGCTCGTGTCTGTGAGATGTT  
GGGTTAAGTCCCAGCAACGAGCGCAACCCTCGTTCCATGTTGCCAGCACGTGATGGTGGGGACTCATGGGA  
GACTGCCGGGGTCAACTCGGAGGAAGGTGGGGATGACGTCAAATCATCATGCCCCTTATGTCTAGGGCTG  
CAAACATGCTACAATGGCCGGAACAAAGGGCTGCGATACCGCAAGGTGGAGCGAATCCCAAAAAGCCGGT  
CTCAGTTTCGGATTGGGGTCTGCAACTCGACCCCATGAAGTTGGAGTCGCTAGTAATCGCAGATCAGCAAC  
GCTGCGGTGAATACGTTCCCGGGCTTGTACACACCGCCCGTACGTCACGAAGGTGCTTAACGCCCGAA  
GCCGGTGGCCCAACCCCTTGTGGGAGGGAGCCGTCGAGGCGGGGATCGGTGATTGGGACGAAGTCGTAAC  
AAGGTTGCCGTA

>gb|CP000750.2|:2411132-2412643 *Kineococcus radiotolerans* SRS30216,  
complete genome

AGAGTTTGATCCTGGCTCAGGACGAACGCTGGCGGCGTGCTTAACACATGCAAGTCGAACGGTGAACCCC  
TTCGGGGGGGATCAGTGGCGAACGGGTGAGTAACACGTGAGCAACCTGCCCTGGCTCTGGGACAACCAC  
TGAAACGGTGGCTAATACCGGATACGACTCATCACCGCATGGTGTGTGGGTGGAAAGTTTTTCGGCTGG  
GGATGGGCTCGCGGCCTATCAGCTTGTGGTGGGGTAATGGCCTACCAAGGCGACGACGGGTAGCCGGCC  
TGAGAGGGCGACCGGCCACACTGGGACTGAGACACGGCCAGACTCCTACGGGAGGCAGCAGTGGGGAAT  
ATTGCACAATGGGCGAAAGCCTGATGCAGCGACGCCGCGTGAGGGATGACGGCCTTCGGGTTGTAAACCT  
CTTTTCAGCTCCGAAGAAGCGAAAGTGACGGTAGGAGCAGAAGAAGCACCGGCTAACTACGTGCCAGCAGC  
CGCGGTAATACGTAGGGTGCAAGCGTTGTCCGGAATTATTGGGCGTAAAGAGCTCGTAGGCGGTGTGTCTG  
CGTCTGCTGTGAAAACCTCAGGGCTCAACTCTGAGCTTGAGTGGGTACGGGCACACTTGAGTGCTGTAGG  
GGAGACTGGAATTCCTGGTGTAGCGGTGAAATGCGCAGATATCAGGAGGAACACCGGTGGCGAAGGCGGG  
TCTCTGGGCAGTTACTGACGCTGAGGAGCGAAAGCATGGGGAGCGAACAGGATTAGATACCCTGGTAGTC  
CATGCCGTAAACGTTGGGCGCTAGGTGTGGGGTCCATTCCACGGATTCCGTGCCGAGCTAACGCATTA  
GCGCCCCGCTGGGAGTACGGCCGCAAGGCTAAAACCTCAAAGGAATTGACGGGGGCCCGCACAAAGCGGC  
GGAGCATGCGGATTAATTCGATGCAACGCGAAGAACCTTACCAAGGCTTGACATGCGCGGTGGAATCCCA  
GAGATGGGGTGTCAATTTAGTTGGTTCGCTACAGGTGGTGCATGGTTGTCTGTCAGCTCGTGTCTGTGAGATG  
TTGGGTTAAGTCCCAGCAACGAGCGCAACCCTCGTTCCATGTTGCCAGCACGTTATGGTGGGGACTCATGG  
GAGACTGCCGGGGTCAACTCGGAGGAAGGTGGGGATGACGTCAAATCATCATGCCCCTTATGTCTTGGGC  
TTCACGCATGCTACAATGGCCAGTACAGAGGGCTGCGATACCGTGAGGTGGAGCGAATCCCAAAAAGCTG  
GTCTCAGTTTCGGATCGGGTCTGCAACTCGACCCCGTGAAGTCGGAGTCGCTAGTAATCGCAGATCAGCA  
ACGCTGCGGTGAATACGTTCCCGGGCTTGTACACACCGCCCGTACGTCATGAAAGTCGGTAACACCCG  
AAGCCGGTGGCCCAACCCGTAAGGGGGGAGCTGTGCAAGGTGGGACTGGCGATTGGGACGAAGTCGTAA  
CAAGGTAGCCGTACCGGAAGGTGCGGCTGGATCACCTCCTTT

>gi|311893446:4796513-4798037 *Kitasatospora setae* KM-6054 DNA, complete  
genome

TCACGGAGAGTTTGATCCTGGCTCAGGACGAACGCTGGCGGCGTGCTTAACACATGCAAGTCGAACGGTG  
AAGCCCTTCGGGGTGGATCAGTGGCGAACGGGTGAGTAACACGTGGGGAATCTGCCCTGAACTCTGGGAC  
AAGCCTTGAAACGAGGTCTAATACCGGATACGACCGCTTCCCGCATGGGGGTGGTGGAAAGCTCCGGC  
GGTTCAGGATGATCCCGCGGCCTATCAGCTTGTGGTGGGGTAACGGCCACCAAGGCGACGACGGGTAG  
CCGGCCTGAGAGGGCGACCGGCCACACTGGGACTGAGACACGGCCAGACTCCTACGGGAGGCAGCAGTG  
GGGAATATTGCACAATGGGCGAAAGCCTGATGCAGCGACGCCGCGTGAGGGATGACGGCCTTCGGGTTGT  
AAACCTCTTTCAGCAGGGAAGAAGCGCAAGTGACGGTACCTGCAGAAGAAGCACCGGCTAACTACGTGCC  
AGCAGCCGCGTAATACGTAGGGTGCAGCGTGTCCGGAATTATTGGGCGTAAAGAGCTCGTAGGCGGC  
CTGTCTGCGTTCGGATGTGAAAGCCCGGGCTTAACCCCGGCTGCAATTCGATACGGGAGGCTAGAGTGT  
GGTAGGGGAGATCGGAATTCCTGGTGTAGCGGTGAAATGCGCAGATATCAGGAGGAACACCGGTGGCGAA  
GGCGGATCTCTGGGCCATTACTGACGCTGAGGAGCGAAAGCGTGGGAGCGAACAGGATTAGATACCCTG  
GTAGTCCACGCCGTAAACGTTGGGAACTAGGTGTTGGCGACATTCACGTCGTCCGTGCGGAGCTAACG  
CATTAAAGTTCCCGCCTGGGGAGTACGGCCGCAAGGCTAAAACCTCAAAGGAATTGACGGGGGCCCGCACA  
AGCAGCGGAGCATGTGGCTTAATTCGACGCAACGCGAAGAACCTTACCAAGGCTTGACATACACCGGAAA  
CTGGTAGAGATATCAGCCCCCTTGTGGTTCGGTGTACAGGTGGTGCATGGTTGTCTGTCAGCTCGTGTCTG  
AGATGTTGGGTTAAGTCCCAGCAACGAGCGCAACCCTTGTCTGTGTTGCCAGCATGCCTTTCGGGGTGT  
GGGACTCACAGGAGACTGCCGGGCTCAACTCGGAGGAAGGTGGGACGACGTCAAATCATCATGCCCCT  
TATGTCTTGGGCTGCACACGTGCTACAATGGCCGGTACAAAGGGCTGCGATGCCCGGAGGCGGAGCGAAT  
CCCAAAAAGCCGCTCAGTTCGGATTGGGGTCTGCAACTCGACCCCATGAAGTTGGAGTTGCTAGTAAT  
CGCAGATCAGCATGCTGCGGTGAATACGTTCCCGGGCTTGTACACACCGCCCGTACGTCACGAAGTC  
GGTAACACCCGAAGCCGGTGGCCTAACCCGTGAGGGGAGGAGCCGTCGAAGGTGGGACCGAGCGATTGGGA  
CGAAGTCGTAACAAGGTAGCCGTACCGGAAGGTGCGGCTGGATCACCTCCTTTCT

>gi|75709237|gb|DQ181633.1| *Kutzneria* sp. 744 16S ribosomal RNA gene,  
partial sequence

GCTGGCGGCGTGCTTAACACATGCAAGTCGAGCGGTAAGGCCCTTCGGGGTACACGAGCGGCGAACGGGT  
GAGTAACACGTGGGCAACCTGCCCTGCACTCTGGGATAAGCCCGGAAACTGGGTCTAATACCGGATATG  
ACCTTCTGCCGGCATGGTGGAGGGTGGAAAGTTCCGGCGGTGCAGGATGGGCCCGCGCCTATCAGCTTG  
TTGGTGGGGTAGTGGCCTACCAAGGCGACGACGGGTAGCCGGCTGAGAGGGCGACCGGCCACACTGGGA  
CTGAGACACGGCCAGACTCCTACGGGAGGCAGCAGTGGGGAATATTGCGCAATGGGCGAAAGCCTGACG  
CAGCGACGCCCGGTGAGGGATGACGGCCTTCGGGTTGTAAACCTCTTTCAGCAGGGACGAAGCGCAAGTG  
ACGGTACCTGCAGAAGAAGCACCGGCTAACTACGTGCCAGCAGCCGCGTAATACGTAGGGTGCAGCGT  
TGTCCGGAATTATTGGGCGTAAAGAGCTCGTAGGGCGTTTGTTCGCGTCGACTGTGAAAACCTACAGCTTA  
ACTGTGGGCTTGCAGTCGATACGGGCAGACTTGAGTTTCGGTAGGGGAGACTGGAATTCCTGGTGTAGCGG  
TGAAATGCGCAGATATCAGGAGGAACACCGGTGGCGAAGGCGGGTCTCTGGGCCGATACTGACGCTGAGG  
AGCGAAAGCGTGGGAGCGAACAGGATTAGATACCCTGGTAGTCCACGCCGTAAACGGTGGGAAC TAGGT  
GTGGGGGGCTTCCACGTCCTCCGTGCCGTAGCTAACGCATTAAGTTCCCCGCTGGGGAGTACGGCCGCA  
AGGCTAAAACCTCAAAGGAATTGACGGGGGCCGCACAAGCGGCGGAACATGTGGATTAATTCGATGCAAC  
GCGAAGAACCTTACCTGGGCTTGACATGCACCTGGAAACCAGTAGAGATATTGGCCCCCTTGTGGCCGGTG  
TACAGGTGGTGCATGGCTGTTCGTGACCTCGTGTTCGTGAGATGTTGGGTTAAGTCCCGCAACGAGCGCAAC  
CCTCGTTCCATGTTGCCAGCGCGTAATGGCGGGGACTCATGGGAGACTGCCGGGTCAACTCGGAGGAAG  
GTGGGGATGACGTCAAGTCATCATGCCCTTATGTCCAGGGCTTCACACATGCTACAATGGCCGGTACAA  
AGGGCTGCTAAGCCGCGAGGTGGAGCGAATCCATAAAGCCGGTCTCAGTTCGGATCGGGGTCTGCAACT  
CGACCCCGTGAAGTCGGAGTCGCTAGTAATCGCAGATCAGCAACGCTGCGGTGAATACGTTCCCGGGCCT  
TGTACACACCCCGTCACGTACGAAAGTCGGTAACACCCGAAGCCCGTGGCCCAACCCGCAAGGGAGG  
GAGCGGTGCAAGGTGGGACTGGCGA

>gb|CP002162.1|:2546563-2548065 *Micromonospora aurantiaca* ATCC 27029,  
complete genome

AGAGTTTGATCCTGGCTCAGGACGAACGCTGGCGGCGTGCTTAACACATGCAAGTCGAGCGGAAAGGCC  
TTCGGGGTACTCGAGCGGCGAACGGGTGAGTAACACGTGAGCAACCTGCCCCAGGCTTTGGGATAACCCC  
GGGAAACCGGGGCTAATACCGAATATGACCTCTGACCGCATGGTTGGTGGTGGAAAGTTTTTCGGCTTGG  
GATGGGCTCGCGCCATCAGCTTGTGGTGGGGTGATGGCCTACCAAGGCGACGACGGGTAGCCGGCCT  
GAGAGGGCGACCGGCCACACTGGGACTGAGACACGGCCAGACTCCTACGGGAGGCAGCAGTGGGGAATA  
TTGCACAATGGGCGGAAGCCTGATGCAGCGACGCCGCGTGAGGGATGACGGCCTTCGGGTTGTAAACCTC  
TTTCAGCAGGGACGAAGCGTAAGTGACGGTACCTGCAGAAGAAGCGCCGGCCAACTACGTGCCAGCAGCC  
GCGGTAAGACGTAGGGCGCGAGCGTTGTCCGGATTTATTGGGCGTAAAGAGCTCGTAGGGCGCTTGTTCGC  
GTCGACCGTGAAAACCTTGGGGCTCAACCCCAAGCCTGCGGTGCATACGGGCAGGCTAGAGTTCGGTAGGG  
GAGACTGGAATTCCTGGTGTAGCGGTGAAATGCGCAGATATCAGGAGGAACACCGGTGGCGAAGGCGGGT  
CTCTGGGCCGATACTGACGCTGAGGAGCGAAAGCGTGGGGAGCGAACAGGATTAGATAACCCTGGTAGTCC  
ACGCTGTAAACGTTGGGCGCTAGGTGTGGGGGGCCTCTCCGGTTCCTGTGCCGACGCTAACGCATTAAG  
CGCCCCGCTGGGGAGTACGGCCGCAAGGCTAAAACCTCAAAGGAATTGACGGGGGCCCGACAAGCGGCG  
GAGCATGCGGATTAATTCGATGCAACGCGAAGAACCTTACCTGGGTTTGACATGGCCGCAAAAACCTGTCAG  
AGATGGCAGGTCCTTCGGGGGCGGTACAGGTGGTGCATGGCTGTTCGTGAGCTCGTGTGAGATGTTG  
GGTTAAGTCCCGCAACGAGCGCAACCTCGTTCGATGTTGCCAGCGGTTATGGCGGGGACTCATCGAAG  
ACTGCCGGGTCAACTCGGAGGAAGGTGGGGATGACGTCAAGTCATCATGCCCTTATGTCCAGGGCTTC  
ACGCATGCTACAATGGCCGGTACAATGGGCTGCGATAACCGTGAGGTGGAGCGAATCCAAAAAGCCGGTC  
TCAGTTCGGATCGGGTCTGCAACTCGACCCCGTGAAGTCGGAGTCGCTAGTAATCGCAGATCAGCAACG  
CTGCGGTGAATACGTTCCCGGGCCTTGTACACACCCCGTCACGTACGAAAGTCGGCAACACCCGAAG  
CCGGTGGCCCAACCTTGTGGAGGGAGCCGTCGAAGGTGGGGCTGGCGATTGGGACGAAGTCGTAACAAG  
GTAGCCGTACCGGAAGGTGCGGCTGGATCACCT

>gi|343201587|ref|NR\_042313.1| *Micromonospora lupini* strain : Lupac 14N  
16S ribosomal RNA, partial sequence

TAGAGTTTGATGCATGGCTCAGGACGANCGCTGGCGGCGTGCTTAACACATGCAAGTCGAGCGGAAAGGC  
CCTTCGGGGTACTCGAGCGGCGAACGGGTGAGTAACACGTGAGCAACCTGCCCAAGCTTTGGGATAACC  
CCGGGAAACCGGGGCTAATACCGAATATTACTTCTGGCCGCATGGCTGGGGGTGGAAAGTTTTTCGGCTT  
GGGATGGGCTCGCGCCATCAGCTTGTGGTGGGGTGATGGCCTACCAAGGCGACGACGGGTAGCCGGC  
CTGAGAGGGCGACCGGCCACACTGGGACTGAGACACGGCCAGACTCCTACGGGAGGCAGCAGTGGGGAA  
TATTGCACAATGGGCGGAAGCCTGATGCAGCGACGCCGCGTGAGGGATGACGGCCTTCGGGTTGTAAACC  
TCTTCAGCAGGGACGAAGCGAGAGTGACGGTACCTGCAGAAGAAGCACCGGCCAACTACGTGCCAGCAGC  
CGCGGTAAGACGTAGGGTGCAGCGTTGTCCGGATTTATTGGGCGTAAAGAGCTCGTAGGGCGCTTGTTCG  
CGTGCACCGTGAAAACCTTGGGGCTCAACCCCAAGCCTGCGGTGCATACGGGCAGGCTAGAGTTCGGTAGG  
GGAGACTGGAATTCCTGGTGTAGCGGTGAAATGCGCAGATATCAGGAGGAACACCGGTGGCGAAGGCGGG  
TCTCTGGGCCGATACTGACGCTGAGGAGCGAAAGCGTGGGGAGCGAACAGGATTAGATAACCCTGGTAGTC

CACGCTGTAAACGTTGGGCGCTAGGTGTGGGGGGCCTCTCCGGTTCCTGTGCCGCAGCTAACGCATTAA  
GCGCCCCGCTGGGGAGTACGGCCGCAAGGCTAAACTCAAAGGAATTGACGGGGGCCCCGACAAGCGGC  
GGAGCATGCGGATTAATTCGATGCAGACGCGAAGAACCTTACCTGGGTTTGACATGGCCGCAAAACCTCC  
AGAGATGGGGGGTTCCTTCGGGGGCGGTACAGGGGGTGCATGGCAGTCGTCAGCTTGTGTCTGAGATG  
TTGGGTTAAGTCCCGCAAACGAGCGCAAACCTCGTTTCGATGTTGCCAGCGCGTTATGGCGGGGACTCAT  
CGAAGACTGCCGGGTCAAACCTCGGAGGAAGGTGGGGATGACGTCAAGTCATCATGCCCTTATGTCCAG  
GGCTTCACGCATGCTACAATGGCCGGTACAATGGGCTGCGATACCGTGAGGTGGAGCGAATCCCAAAAAG  
CCGGTCTCAGTTCGGATCGGGGTCTGCAACTCGACCCCGTGAAGTCGGAGTCGCTAGTAATCGCAGATCA  
GCAACGTCTGCGGTGAATACGTTCCCGGGCCTTGTACACACCCCGCCGTCACGTACGAAAGTCGGCAACA  
GCCCCAAGCCGGTGGCCCAACCCTTGTGGAAAGAGCCGTGCAAGGTGGGGCTGGCGA

>gi|444303992|ref|NR\_074416.1| *Micromonospora* sp. L5 strain L5 16S  
ribosomal RNA, complete sequence

AGAGTTTGATCCTGGCTCAGGACGAACGCTGGCGGCGTGCTTAACACATGCAAGTCGAGCGGAAAGGCC  
TTCGGGGTACTCGAGCGGCGAACGGGTGAGTAACACGTGAGCAACCTGCCCCAGGCTTTGGGATAACCCC  
GGGAAACCGGGGCTAATACCGAATATGACCTCTGACCGCATGGTTGGTGGTGGAAAGTTTTTCGGCTTGG  
GATGGGCTCGCGGCCATCAGCTTGTGGTGGGGTGATGGCCTACCAAGGCGACGACGGGTAGCCGGCCT  
GAGAGGGCGACCGGCCACACTGGGACTGAGACACGGCCAGACTCCTACGGGAGGCAGCAGTGGGGAATA  
TTGCACAATGGGCGGAAGCCTGATGCAGCGACGCCGCGTGAGGGATGACGGCCTTCGGGTGTAAACCTC  
TTTCAGCAGGGACGAAGCGTAAGTGACGGTACCTGCAGAAGAAGCGCCGGCCAACTACGTGCCAGCAGCC  
GCGGTAAGACGTAGGGCGCGAGCGTTGTCCGGATTTATTGGGCGTAAAGAGCTCGTAGGCGGCTTGTGCG  
GTCGACCGTGAAAACCTGGGGCTCAACCCCAAGCCTGCGGTGATACGGGCAGGCTAGAGTTCCGGTAGGG  
GAGACTGGAAATTCCTGGTGTAGCGGTGAAATGCGCAGATATCAGGAGGAACACCGGTGGCGAAGGCGGGT  
CTCTGGGCCGATACTGACGCTGAGGAGCGAAAGCGTGGGGAGCGAACAGGATTAGATAACCTGGTAGTCC  
ACGCTGTAAACGTTGGGCGCTAGGTGTGGGGGGCCTCTCCGGTTCCTGTGCCGCAGCTAACGCATTAAG  
CGCCCCGCTGGGGAGTACGGCCGCAAGGCTAAACTCAAAGGAATTGACGGGGGCCCCGACAAGCGGCG  
GAGCATGCGGATTAATTCGATGCAACGCGAAGAACCTTACCTGGGTTTGACATGGCCGCAAAACTGTCAG  
AGATGGCAGGTCCTTCGGGGGCGGTACAGGTGGTGCATGGCTGTCGTCAGCTCGTGTCTGAGATGTTG  
GGTTAAGTCCCGCAAACGAGCGCAAACCTCGTTTCGATGTTGCCAGCGCGTTATGGCGGGGACTCATCGAAG  
ACTGCCGGGTCAAACCTCGGAGGAAGGTGGGGATGACGTCAAGTCATCATGCCCTTATGTCCAGGGCTTC  
ACGCATGCTACAATGGCCGGTACAATGGGCTGCGATACCGTGAGGTGGAGCGAATCCCAAAAAGCCGGTC  
TCAGTTCGGATCGGGGTCTGCAACTCGACCCCGTGAAGTCGGAGTCGCTAGTAATCGCAGATCAGCAACG  
CTGCGGTGAATACGTTCCCGGGCCTTGTACACACCCCGCCGTCACGTACGAAAGTCGGCAACACCCGAAG  
CCGGTGGCCCAACCCTTGTGGAGGGAGCCGTGCAAGGTGGGGCTGGCGATTGGGACGAAGTCGTAACAAG  
GTAGCCGTACCGGAAGGTGCGGCTGGATCACCT

>gi|444304055|ref|NR\_074479.1| *Modestobacter marinus* strain BC501 16S  
ribosomal RNA, complete sequence

AGAGTTTGATCCTGGCTCAGGACGAACGCTGGCGGCGTGCTTAACACATGCAAGTCGAGCGAGGCCCTCC  
TTCGGGGGGTGCCTAGCGGCGAACGGGTGAGTAACACGTGGGCAACCTGCCCTCAGCTCTGGGATAACT  
CCAAGAAATTTGGTGCTAATACCGGATGTGACCGCTGACCGCATGGTCTGGTGGTGGAAAGATTCATCGGC  
TGAGGATGGGCCCGCGGCCATCAGCTTGTGGTGGGGTAATGGCTACCAAGGCGACGACGGGTAGCCG  
GCCTGAGAGGGTGACCGGCCACACTGGGACTGAGACACGGCCAGACTCCTACGGGAGGCAGCAGTGGGG  
AATATTGCGCAATGGGCGAAAGCCTGACGCGAGCGACGCCGCGTGAGGGATGACGGCCTTCGGGTGTAAA  
CCTCTTTCAGTAGGGACGAAGCGCAAGTGACGGTACCTACAGAAGAAGCACCGGCCAACTACGTGCCCAGC  
AGCCGCGGTAATACGTAGGGTGCAAGCGTTGTCCGGAATTATTGGGCGTAAAGAGCTCGTAGGCGGTCTG  
TCAGTCTGGCTGTGAAAACCCGAGGCTCAACCTCGGGCCTGCAGTCGATACGGGCAAACTAGAGTACTGC  
AGGGGAGACTGGAATTCCTGGTGTAGCGGTGAAATGCGCAGATATCAGGAGGAACACCGGTGGCGAAGGC  
GGGTCTCTGGGCAGTAACCTGACGCTGAGGAGCGAAAGCGTGGGGAGCGAACAGGATTAGATAACCTGGTA  
GTCCACGCCGTAAACGTTGGGCGCTAGGTGTGGGGGCCATTCCACGCTCTCCGTGCCGCAGCTAACGCAT  
TAAGCGCCCCGCTGGGGAGTACGGCCGCAAGGCTAAACTCAAAGGAATTGACGGGGGCCCCGACAAGC  
GGCGGAGCATGTTGCTTAATTCGATGCAACGCGAAGAACCTTACCTAGGCTTGACATGCACGAAATCTC  
GTAGAGATACGGGGTGCCTTTGGCGCTCGTGCACAGGTGGTGCATGGTTGTCTGTCAGCTCGTGTCTGAGA  
TGTGGGTTAAGTCCCGCAAACGAGCGCAAACCTCGTTCTATGTTGCCAGCACGTGATGGTGGGGACTCAT  
AGGAGACTGCCGGGTCAAACCTCGGAGGAAGGTGGGGATGACGTCAAATCATCATGCCCTTATGTCTAGG  
GCTGCAACATGCTACAATGGCCGGTACAAAGGGCTGCGATACCGGAGGTGGAGCGAATCCCAAAAAGC  
CGGTCTCAGTTCGGATTGGGGTCTGCAACTCGACCCCATGAAGTTGGAGTCGCTAGTAATCGCAGATCAG  
CAACGCTGCGGTGAATACGTTCCCGGGCCTTGTACACACCCCGCCGTCACGTACGAAAGTCGGTAACGCC  
CGAAGCCGGTGGCCCAACCCTTGTGGAGGGAGCCGTGCAAGGCGGGATCGGCGATTGGGACGAAGTCGTA  
ACAAGGTAGCCGTACCGGAAGGTGCGGCTGGATCACCT





CTAACGCATTAAGCGCCCCGCCTGGGGAGTACGGCCGCAAGGCTAAAACCTCAAAGGAATTGACGGGGGCC  
CGCACAAGCGGCGGAGCATGCGGATTAATTCGATGCAACGCGAAGAACCTTACCTGGGTTTGACATACGC  
CGGAAAGCGCCAGAGATGGTGGCCCTTTTAGTTCGGTGTACAGGTGGTGCATGGCTGTCTCAGCTCGTGT  
CGTGAGATGTTGGGTTAAGTCCCAGCAACGAGCGCAACCCTCGTCCTATGTTGCCAGCACGTGATGGTGGG  
GACTCATAGGAGACTGCCGGGGTCAACTCGGAGGAAGGTGGGGATGACGTCAAGTCATCATGCCCTTAT  
GTCCAGGGCTTCACGCATGCTACAATGGCCGGTACAAAGGGCTGCGATGCTGTAAGGCGGAGCGAATCCC  
AAAAAGCCGGTCTCAGTTCGGATTGGGGTCTGCAACTCGACCCCATGAAGTCGGAGTCGCTAGTAATCGC  
AGATCAGCAACGCTGCGGTGAATACGTTCCCGGGCCTTGTACACACCGCCCGTCACGTACGAAAGTCGG  
CAACACCCGAAGCCGGTGGCCTAACCTTGTGGGGGGAGCCGTCGAAGGTGGGGCTGGCGATTGGGACGA  
AGTCGTAACAAGGTAGCCGTACCGGAAGGTGCGGCTGGATCACCTCCTTT  
>gi|444304183|ref|NR\_074607.1| Nocardiosis alba ATCC BAA-2165 strain  
ATCC BAA-2165 16S ribosomal RNA, complete sequence  
GAGTTTGTATCCTGGCTCAGGACGAACGCTGGCGGCGTGCTTAACACATGCAAGTCGAGCGGTAAGGCCCT  
TCGGGGTACACGAGCGGCGAACGGGTGAGTAACACGTGAGTAACCTGCCCTGACTCTGGGATAAGCGGT  
GGAAACGCCGTCTAATACCGGATACGACCTTCCGCTCATGGTGGAGGGTGGAAAGTTTTTTTCGGTCAGG  
GATGGGCTCGCGGCCTATCAGCTTGTGGTGGGGTAACGGCCTACCAAGGCGATTACGGGTAGCCGGCCT  
GAGAGGGCGACCGGCCACACTGGGACTGAGACACGGCCAGACTCCTGCGGGAGGCAGCAGTGGGGAATA  
TTGCGCAATGGGCGAAAGCCTGACGCAGCGACGCCGCGTGGGGGATGACGGCCTTCGGGTGTAAACCTC  
TTTTACCACCAACGCAGGCTCCGGGTTTTCTCGGGGTTGACGGTAGGTGGGGAATAAGGACCGGCTAACT  
ACGTGCCAGCAGCCGCGGTAATACGTAGGGTCCGAGCGTGTGCCGAATTATTGGGCGTAAAGAGCTCGT  
AGGCGGCGTGTGCGCTGTGCTGTGAAAAGACCGGGCTTAACTCCGGTCTGCAGTGGATAACGGGCATGCT  
AGAGGTAGGTAGGGGAGACTGGAATTCCTGGTGTAGCGGTGAAATGCGCAGATATCAGGAGGAACACCGG  
TGGCGAAGGCGGGTCTCTGGGCCTTACCTGACGCTGAGGAGCGAAAGCATGGGGAGCGAACAGGATTAGA  
TACCCTGGTAGTCCATGCCGTAACGTTGGGCGCTAGGTGTGGGGACTTTCCACGGTTTTCCGCGCCGTAG  
CTAACGCATTAAGCGCCCCGCCTGGGGAGTACGGCCGCAAGGCTAAAACCTCAAAGGAATTGACGGGGGCC  
CGCACAAGCGGCGGAGCATGTTGCTTAATTCGACGCAACGCGAAGAACCTTACCAAGGTTTGACATCACC  
CGTGGACCTGTAGAGATACAGGGTCATTTAGTGGTGGGTGACAGGTGGTGCATGGCTGTCTCAGCTCG  
TGTCGTGAGATGTTGGGTTAAGTCCCAGCAACGAGCGCAACCCTTGTTCATGTTGCCAGCACGTAATGGT  
GGGACTCATGGGAGACTGCCGGGGTCAACTCGGAGGAAGGTGGGGACGACGTCAAGTCATCATGCCCT  
TATGTCTTGGGCTGCAAACATGCTACAATGGCCGGTACAATGGGCGTGCGATACCGTAAGGTGGAGCGAA  
TCCCTTAAAGCCGGTCTCAGTTCGGATTGGGGTCTGCAACTCGACCCCATGAAGGTGGAGTCGCTAGTAA  
TCGCGGATCAGCAACGCCGCGGTGAATACGTTCCCGGGCCTTGTACACACCGCCCGTCACGTATGAAAG  
TCGGCAACACCCGAAACTTGCGGCCTAACCTTCCGGGAGGGAGTGAGTGAAGGTGGGGCTGGCGATTGG  
GACGAAGTCGTAACAAGGTAGCCGTACCGGAAGGTGCGGCTGGATCACC  
>gb|CP002040.1|:67127-68647 Nocardiosis dassonvillei subsp.  
dassonvillei DSM 43111 chromosome 1, complete sequence  
AGAGTTTGATCCTGGCTCAGGACGAACGCTGGCGGCGTGCTTAACACATGCAAGTCGAGCGGTAAGGCC  
TTCGGGGTACACGAGCGGCGAACGGGTGAGTAACACGTGAGCAACCTGCCCTGACTCTGGGATAAGCGG  
TGAAACGCCGTCTAATACCGGATACGACCCGCCACCTCATGGTGGAGGGTGGAAAGTTTTTCGGTCAGG  
GATGGGCTCGCGCCTATCAGCTTGTGGTGGGGTAACGGCCTACCAAGGCGATTACGGGTAGCCGGCCT  
GAGAGGGCGACCGGCCACACTGGGACTGAGACACGGCCAGACTCCTGCGGGAGGCAGCAGTGGGGAATA  
TTGCGCAATGGGCGAAAGCCTGACGCAGCGACGCCGCGTGGGGGATGACGGCCTTCGGGTGTAAACCTC  
TTTTACCACCAACGCAGGCTTCCAGTCTCTGGAGGTTGACGGTAGGTGGGGAATAAGGACCGGCTAACT  
ACGTGCCAGCAGCCGCGGTAATACGTAGGGTCCGAGCGTGTGCCGAATTATTGGGCGTAAAGAGCTCGT  
AGGCGGCGTGTGCGCTGTGCTGTGAAAAGACCGGGCTTAACTCCGGTCTGCAGTGGATAACGGGCATGCT  
AGAGGTAGGTAGGGGAGACTGGAATTCCTGGTGTAGCGGTGAAATGCGCAGATATCAGGAGGAACACCGG  
TGGCGAAGGCGGGTCTCTGGGCCTTACCTGACGCTGAGGAGCGAAAGCATGGGGAGCGAACAGGATTAGA  
TACCCTGGTAGTCCATGCCGTAACGTTGGGCGCTAGGTGTGGGGACTTTCCACGGTTTTCCGCGCCGTAG  
CTAACGCATTAAGCGCCCCGCCTGGGGAGTACGGCCGCAAGGCTAAAACCTCAAAGGAATTGACGGGGGCC  
CGCACAAGCGGCGGAGCATGTTGCTTAATTCGACGCAACGCGAAGAACCTTACCAAGGTTTGACATCACC  
CGTGGACTCGCAGAGATGTGAGGTCATTTAGTGGCGGGTGCAGGTGGTGCATGGCTGTCTCAGCTCG  
TGTCGTGAGATGTTGGGTTAAGTCCCAGCAACGAGCGCAACCCTTGTTCATGTTGCCAGCACGTAATGGT  
GGGACTCATGGGAGACTGCCGGGGTCAACTCGGAGGAAGGTGGGGATGACGTCAAGTCATCATGCCCT  
TATGTCTTGGGCTGCAAACATGCTACAATGGCCGGTACAATGGGCGTGCGATACCGTAAGGTGGAGCGAA  
TCCCTAAAAGCCGGTCTCAGTTCGGATTGGGGTCTGCAACTCGACCCCATGAAGGTGGAGTCGCTAGTAA  
TCGCGGATCAGCAACGCCGCGGTGAATACGTTCCCGGGCCTTGTACACACCGCCCGTCACGTATGAAAG  
TCGGCAACACCCGAAACTTGCGGCCTAACCTTGTGGGAGGGAGTGAGTGAAGGTGGGGCTGGCGATTG  
GGACGAAGTCGTAACAAGGTAGCCGTACCGGAAGGTGCGGCTGGATCACCT

>gb|CP002593.1|:577609-579116 *Pseudonocardia dioxanivorans* CB1190, complete genome  
AGAGTTTGATCCTGGCTCAGGACGAACGCTGGCGGCGTGCTTAACACATGCAAGTCGAGCGGTAAGGCCT  
TTCGGGGTACACGAGCGGCGAACGGGTGAGTAACACGTGGGTGACCTGCCCTCCACTCTGGGATAAGCCT  
GGGAAACTGGGTCTAATACCGGATATGACCACGGATCGCATGGTGTGTGGTGGAAAGTTTTTTCGGTGGG  
GGATGGGCCCCGCGCCTATCAGCTTGTGGTGGGGTGTATGGCCTACCAAGGCGACGACGGGTAGCCGGCC  
TGAGAGGGCGACCGGCCACACTGGGACTGAGACACGGCCCAGACTCCTACGGGAGGCAGCAGTGGGGAAT  
ATTGCGCAATGGGCGGAAGCCTGACGCAGCGACGCCGCGTGGGGGATGACGGCCTTCGGGTGTAAACCT  
CTTTCGCCAGGGACGAAGCGTGTAGTGACGGTACCTGGATAAGAAGCACCGGCCAACTACGTGCCAGCAGC  
CGCGGTAACACGTAGGGTGCAGCGTGTCCGGAATTATTGGGCGTAAAGAGCTCGTAGGCGGTCTGTGCG  
CGTCCGTCGTGAAAACCTGCAGCTTAACTGTGGGCTTGCGGTCGATACGGGCATGACTGGAGTTCGGCAG  
GGGAGACTGGAATTCCTGGTGTAGCGGTGAAATGCGCAGATATCAGGAGGAACACCGGTGGCGAAGGCGG  
GTCTCTGGGCCGATACTGACGCTGAGGAGCGAAAGCGTGGGGAGCGAACAGGATTAGATAACCTGGTAGT  
CCACGCCGTAACGTTGGGCGCTAGGTGTGGGGGCCATTCCACGGTCTCTGTGCCGACGCTAACGCATTA  
AGCGCCCCGCTGGGGAGTACGGCCGAAGGCTAAAACCTCAAAGGAATTGACGGGGGGCCGCACAAGCGG  
CGGAGCATGTGGATTAATTCGATGCAACGCGAAGAACCTTACCTGGGTTTGACATGCACCAGACATCCCT  
AGAGATAGGGCTTCCCTTGTGGTTGGTGTGCAGGTGGTGCATGGCTGTGTCAGCTCGTGTGTCGATG  
TTGGGTAAAGTCCCGCAACGAGCGCAACCCTCGTTCCATGTTGCCAGCGGGTTATGCCGGGGACTCATGG  
GAGACTGCCGGGGTCAACTCGGAGGAAGTGGGGATGACGTCAAGTCATCATGCCCTTATGTCCAGGGC  
TTCACACATGCTACAATGGCAAGTACAGAGGGCTGCGAGACCGTGAGGTGGAGCGAATCCCTTAAAGCTT  
GTCTCAGTTCGGATCGGGGTCTGCAACTCGACCCCGTGAAGTTGGAGTCGCTAGTAATCGCAGATCAGCA  
ACGCTGCGGTGAATACGTTCCCGGGCCTTGTACACACCGCCCGTACGTCACGAAAGTTGGTAACACCCG  
AAGCCGACGGCCTAACCCCTTGTGGGAGGGAGTTGTGCAAGGTGGGACTGGCGATTGGGACGAAGTCGTA  
ACAAGGTAGCCGTACCGGAAGGTGCGGCTGGATCACCT

>gi|418460477|ref|NZ\_AHBX01000067.1| *Saccharomonospora azurea* SZMC 14600 contig67, whole genome shotgun sequence  
TTGGAGAGTTTGATCCTGGCTCAGGACGAACGCTG  
GCGGCGTGCTTAACACATGCAAGTCGAACGCTGAAGCCCAGCTTGCTGGGTGGATGAGTG  
GCGAACGGGTGAGTAACACGTGGGTAATCTGCCCTGTACTCTGGGATAAGCCTGGGAAAC  
TGGGTCTAATACCGGATAGGACACACTGCCGCATGGTGGTGTGTGGAAAGCTCCGGCGGT  
ACAGGTTGAGCCCGCGGCCTATCAGCTTGTGGTGGGGTGTATGGCTACCAAGGCGACGA  
CGGGTAGCCGGCCTGAGAGGGTGACCGGCCACACTGGGACTGAGACACGGCCCAGACTCC  
TACGGGAGGCAGCAGTGGGGAATATTGCACAATGGGCGCAAGCCTGATGCAGCGACGCCG  
CGTGGGGGATGACGGCCTTCGGGTGTAAACCCCTTTCGCCAGGGACGAAGCGTAAGTGA  
CGGTACCTGGAGAAGAAGCACCGGCCAACTACGTGCCAGCAGCCGCGGTAATACGTAGGG  
TGCAAGCGTGTCCGGAATTATTGGGCGTAAAGAGCTCGTAGGCGGTGTGTACAGTCTGC  
CGTGAACCTGCGGCTTAACCGTGGGCGTGGGTGGATAACGGGCATCACTTGAGTTCGG  
TAGGGGAGACTGGAATTCCTGGTGTAGCGGTGGAATGCGCAGATATCAGGAGGAACACCG  
GTGGCGAAGGCGGGTCTCTGGGCCGATACTGACGCTGAGGAGCGAAAGCGTGGGGAGCGA  
ACAGGATTAGATAACCTGGTAGTCCACGCCGTAACGTTGGGCGCTAGGTGTGGGGCGCT  
GTTACAGTGTCCCGTGCCGTAGCTAACGCATTAAGCGCCCCGCTGGGGAGTACGGCCGC  
AAGGCTAAAACCTCAAAGGAATTGACGGGGGCCCGCACAAAGCGGCGAGCATGTGGATTAA  
TTCGATGCAACGCGAAGAACCTTACCTGGGCTTGACATGCACCGGATCGCCTCAGAGATG  
GGTTTTCCCTTGTGGTCCGTGCACAGGTGGTGCATGGCTGTGTCAGCTCGTGTGTCGAG  
CGGGGACTCGTGGGAGACTGCCGGGGTCAACTCGGAGGAAGGTGGGGATGACGTCAAGTC  
ATCATGCCCCCTTATGTCCAGGGCTTACACATGCTACAATGGCTGGTACAGAGGGTTGCG  
ATACCGTGAGGTGGAGCGAATCCCTTAAAGCCAGTCTCAGTTCGGATCGCAGTCTGCAAC  
TCGACTGCGTGAAGTCGGAGTCGCTAGTAATCGCAGATCAGCATTGCTGCGGTGAATACG  
TTCCCGGGCCTTGTACACACCGCCCGTACGTCATGAAAGTCGGTAACACCCGAAGCCCA  
TGGCCCAACCCGCTTGCGGGGGGAGTGGTCAAGGTGGGACTGGCGATTGGGACGAAGT  
CGTAACAAGGTAGCCGTACCGGAAGGTGCGGCTGGATCACCTCCTTTCTAAGGA

>gb|CP001683.1|:564225-565751 *Saccharomonospora viridis* DSM 43017, complete genome  
CATTGTTGGAGAGTTTGATCCTGGCTCAGGACGAACGCTGGCGGCGTGCTTAACACATGCAAGTCGAACG  
CTGAAGCCGCTTTCGGGCGGTGGATGAGTGGCGAACGGGTGAGTAACACGTGGGTAATCTGCCCTGTACT  
CTGGGATAAGCCTGGGAAACTGGGTCTAATACCGGATAGGACACGCTACCGCATGGTGGTGTGTGGAAAG  
CTTCGGCGGTACAGGATGAGCCCCGCGCCTATCAGCTAGTTGGTGGGGTGTATGGCCTACCAAGGCGACGA

CGGGTAGCCGGCCTGAGAGGGTGACCGGCCACACTGGGACTGAGACACGGCCCAGACTCCTACGGGAGGC  
AGCAGTGGGGAATATTGCACAATGGGCGGAAGCCTGATGCAGCGACGCCGCGTGGGGGATGACGGCCTTC  
GGGTTGTAACCCTTTTCGCCCCGGGACGAAGCGAGAGTGACGGTACCGGGAGAAGAAGCACCGGCCAACT  
ACGTGCCAGCAGCCGCGGTAATACGTAGGGTGC AAGCGTTGTCCGGAATTATTGGGCGTAAAGAGCTCGT  
AGGCGGTGTGTCGCGTCTGCCGTGAAAACCTGCGGCTTAACCGTGGGCGTGC GGTGGATAACGGGCACACT  
TGAGTTCGGTAGGGGAGACTGGAATTCCTGGTGTAGCGGTGGAATGCGCAGATATCAGGAGGAACACCAG  
TGGCGAAGGCGGTCTCTGGGCCGAAACTGACGCTGAGGAGCGAAAAGCGTGGGGAGCGAACAGGATTAGA  
TACCCTGGTAGTCCACGCCGTAAACGGTGGGCGCTAGGTGTGGGATGCTGTTACGTTGTCCTCGTCCGTA  
GCTAACGCATTAAGCGCCCCGCTGGGAGTACGGCCGCAAGGCTAAAACCTCAAAGGAATTGACGGGGGC  
CCGCACAAGCGGCGGAGCATGTGGATTAATTTCGATGCAACGCGAAGAACCTTACCTGGGTTTGACATGCA  
CTGGACCGGCTAGAGATACGCCTTCCCTTGTGGCTGGTGCACAGGTGGTGCATGGCTGTCTCAGCTCG  
TGTCGTGAGATGTTGGGTTAAGTCCCGCAACGAGCGCAACCCTTGTCCCATGTTGCCAGCGGTAATGCC  
GGGGACTCGTGGGAGACTGCCGGGGTCAACTCGGAGGAAGGTGGGGACGACGTCAAGTCATCATGCCCT  
TATGCCCAGGGCTTACACATGCTACAATGGCCAGTACAGAGGGTTGCGAGACCGTGAGGTGGAGCGAAT  
CCCTTAAAGCTGGTCTCAGTTCGGATCGTAGTCTGCAACTCGACTACGTGAAGTCGGAGTCGCTAGTAAT  
CGCAGATCAGCAACGCTGCGGTGAATACGTTCCCGGGCCTTGTACACACCGCCCGTCACGTCAAGAGT  
CGGTAACACCCGAAGCCCATGGCCTAACCCCGTCAGGGGAGGGAGTGGTTCGAAGGTGGGACCGGCGATTG  
GGACGAAGTCGTAACAAGGTAGCCGTACCGGAAGGTGCGGCTGGATCACCTCCTTTTC

>gi|133909243:1402795-1404188 *Saccharopolyspora erythraea* NRRL2338  
complete genome

TTAACACATGCAAGTCGAACGCTGAAGCATCTTCGGGTGTGGATGAGTGGCGAACGGGTGAGTAACACGT  
GGGTAATCTGCCCTGCACTCTGGGATAAGCCCGGAAACTGGGTCTAATACCGGATAGGACACATGGCCG  
CATGGTCTGTGTGTGGAAAGTTCCGGCGGTGCAGGATGAGCCCGCGGCCTATCAGCTTGTGGTGGGGTG  
ATGGCCTACCAAGGCGACGACGGGTAGCCGGCCTGAGAGGGTGACCGGCCACACTGGGACTGAGACACGG  
CCCAGACTCCTACGGGAGGCAGCAGTGGGGAATCTTGC GCAATGGGCGAAAGCCTGACGCAGCAACGCCG  
CGTGGGGGATGACGGCCTTCGGGTGTAAACCTCTTTCGACATCGACGAAGCCTTCGGGTGACGGTAGGT  
GTAGAAGAAGCACCGGCTAACTACGTGCCAGCAGCCGCGGTAATACGTAGGGTGC GAGCGTGTCCGGAT  
TTATTGGGCGTAAAGAGCTCGTAGGCGGTTTGTGCGCTCGTTCGTGAAAACCTGGAGGCTTAACTTCAGC  
TTGCGGTGCATACGGGCAGACTTGAGTTCGGTAGGGGAGACTGGAATTCCTGGTGTAGCGGTGAAATGCG  
CAGATATCAGGAGGAACACCGGTGGCGAAGGCGGGTCTCTGGGCCGATACTGACGCTGAGGAGCGAAAGC  
GTGGGGAGCGAACAGGATTAGATAACCTGGTAGTCCACGCCGTAAACGTTGGGCGCTAGGTGTGGGGACT  
GTTTCCACGGTTCCTGTGCCGTAGCTAACGCATTAAGCGCCCCGCTGGGGAGTACGGCCGCAAGGCTAA  
AACTCAAAGGAATTGACGGGGGCCCGCAC AAGCGGCGGAGCATGTGGATTAATTTCGATGCAACGCGAAGA  
ACCTTACCTGGGTTTGACATGCACTAGACTGCCTCAGAGATGGGGTTTCCCTTGTGGTTGGTGTACAGGT  
GGTGCATGGCTGTCTCAGCTCGTGTCTGTGAGATGTTGGGTTAAGTCCCGCAACGAGCGCAACCCTTGT  
CTGTGTTGCCAGCACGTAATGGTGGGGACTCGCGGGAGACTGCCGGGTCAACTCGGAGGAAGGTGGGGA  
TGACGTCAAGTCATCATGCCCTTATGTCCAGGGCTTACACATGCTACAATGGCCGGTACAGAGGGTTG  
CGATGCCGTGAGGTGGAGCGAATCCCTTAAAGCTGGTCTCAGTTCGGATCGGGGTCTGCAACTCGACCCC  
GTGAAGTCGGAGTCGCTAGTAATCGCAGATCAGCATTGCTGCGGTGAATACGTTCCCGGGCCTTGTACAC  
ACCGCCCGTCACGTCAAGAGTCGGTAACACCCGAAGCCCATGGCCCAACCCTTTGGGGGGGA

>gi|2289247|gb|AF002818.1| *Saccharopolyspora spinosa* 16S ribosomal RNA  
gene, partial sequence

GCAAGTCGAACGCTGAAGCATCTTCGAGGTGTGGATGAGTGGCGAACGGGTGAGTAACACGTGGGTAATC  
TGCCCTGCACTCTGGGATAAGCCTTGAAACGGGGTCTAATACCGGATATGACACATTATCGCATGGTGG  
TGTGTGAAAGTTCTGGCGGTGCAGGATGAGTCCGCGGCCTATCAGCTTGTGGTGGGGTGATGGCCTAC  
CAAGGCGACGACGGGTAGCCGGCCTGAGAGGGTGACCGGCCACACTGGGACTGAGACACGGCCAGACTC  
CTACGGGAGGCAGCAGTGGGGAATCTTGC GCAATGGGCGAAAGCCTGACGCAGCAACCGCCGTGGGGGA  
TGACGGCTTCGGGTTGTAAACCTCTTTCGACATCGACGAAGCCTTCGGGTGACGGTAGGTGTAGAAGAAG  
CACCGGCTAACTACGTGCCAGCAGCCGCGTAATACGTAGGGTGC GAGCGTTCTCCGGATTATTGGGGC  
TAAAGAGCTCGTAGGCGGTTTGTGCGCTCGGCCGTGAAAACCTGCAGCTTAACTGTGGGCTTGC GGTGCA  
TACGGGCAGACTTGAGTTCGGTAGGGGAGACTGGAATTCCTGGTGTAGCGGTGAAATGCGCAGATATCAG  
GAGGAACACCGGTGGCGAAGGCGGGTCTCTGGGCCGATACTGACGCTGAGGAGCGAAAGCGTGGGGAGCG  
AACAGGATTAGATAACCTGGTAGTCCACGCCGTAAACGTTGGGCGCTAGGTGTGGGGATGGGTTCCACTG  
TTTCCGTGCCGTAGCTAACGCATTAAGCGCCCCGCTGGGGAGTACGGCCGCAAGGCTAAAACCTCAAAGG  
AATTGACGGGGGCCCGCAC AAGCGGCGGAGCATGTGGATTAATTTCGATGCAACGCGAAGAACCTTACCTG  
GGTTTGACATGCACTAGACAGCTCCAGAGATGGGGTTTCCCTTGTGGTTGGTGTACAGGTGGTGCATGGC  
TGTCGTACGCTCGTGTCTGTGAGATGTTGGGTTAAGTCCCGCAACGAGCGCAACCCTTGCCTATGTTGCC  
AGCGGGTTATGCCGGGGACTCGTGGGGGACTGCCGGGGTCAACTCGGAGGAAGGTGGGGATGACGTCAAG

TCATCATGCCCTTATGCCAGGGCTTCACACATGCTACAATGGCTGGTACAGAGGGTGGCGATATCGTG  
AGGTGGAGCGAATCCCTTAAAGCCGGTCTCAGTTCGGATCGGGGTCTGCAACTCGACCTCGTGAAGTCGG  
AGTTCGCTAGTAATCGCAGATCAGCATTGCTGCGGTGAATACGTTCCCGGGCCTTGTACACACCGCCCGTC  
ACGTCATGAAAGTCGGTAACACCCGAAGCCATGGCCCAACCCCTTGTGGGGGGAGTGGTCAAGGTGGGA  
CTGGCGATTGGGACGAAGTCGTAACAAGGTAGCCGTACCGGAAGGTGCGGCTGGATCACCTCCTT  
>gi|433601838:1012089-1013592 *Saccharothrix espanaensis* DSM 44229  
complete genome

AGAGTTTGATCCTGGCTCAGGACGAACGCTGGCGGCGTGCTTAACACATGCAAGTCGAGCGGTAAGGCC  
TTCGGGGTACACGAGCGGCGAACGGGTGAGTAACACGTGGGTAACCTGCCCTGTACTCCGGGATAAGCCT  
GGGAAACTAGGTCTAATACCGGATACGACCCCATGGGGCATCTTGTGGGGTGGAAAGTTCGGCGGTATG  
GGATGGACCCGCGCCTATCAGCTTGTGGTGGGGTGTAGGCTACCAAGGCGACGACGGGTAGCCGGCC  
TGAGAGGGTGACCGGCCACACTGGGACTGAGACACGGCCAGACTCCTACGGGAGGCAGCAGTGGGGAAT  
ATTGCACAATGGGCGAAAGCCTGATGCAGCGACGCCGCGTGAGGGATGACGGCCTTCGGGTTGTAAACCT  
CTTTTCAGCAGGGACGAAGCGTGAGTGACGGTACCTGCAGAAGAAGCACCGGCTAACTACGTGCCAGCAGC  
CGCGGTAATACGTAGGGTGCAGCGTGTCCGGAATTATTGGGCGTAAAGAGCTCGTAGGCGGTTTGTG  
CGTCCGGCCGTGAAAACCTCACGCTTAACGTGGAGCCTGCGGTCGATACGGGCAGACTTGAGTTCGGCAGG  
GGAGACTGGAATTCCTGGTGTAGCGGTGAAATGCGCAGATATCAGGAGGAACACCGGTGGCGAAGGCGGG  
TCTCTGGGCCGATACTGACGCTGAGGAGCGAAAGCGTGGGGAGCGAACAGGATTAGATACCCTGGTAGTC  
CACGCCGTAAACGGTGGGTGCTAGGTGTGGGGGGCTTCCACGTCCTCCGTGCCGAGCTAACGCATTAAG  
CACCCCGCCTGGGGAGTACGGCCGAAGGCTAAAACCTCAAAGGAATTGACGGGGGGCCCGACAAGCGGCG  
GAGCATGTGGATTAATTCGATGCAACGCGAAGAACCTTACCTGGGCTTGACATGCACCGGAAACCTGCAG  
AGATGTAGGCCTCTTCGGACTGGTGTACAGGTGGTGCATGGCTGTCGTCAGCTCGTGTGAGATGTTG  
GGTAAAGTCCCGCAACGAGCGCAACCCCTCGTTCATGTTGCCAGCGGTTATGGCGGGGACTCATGGGAG  
ACTGCCGGGGTCAACTCGGAGGAAGGTGGGGATGACGTCAAGTCATCATGCCCTTATGTCCAGGGCTTC  
ACACATGCTACAATGGCCGGTACAGAGGGCTGCTAAGCCGTGAGGTGGAGCGAATCCACAAAAGCCGGTC  
TCAGTTCGGATCGGGGTCTGCAACTCGACCCCGTGAAGTCCGAGTCGCTAGTAATCGCAGATCAGCAACG  
CTGCGGTGAAATACGTTCCCGGGCCTTGTACACACCGCCCGTCACGTCACGAAAGTCGGTAACACCCGAAG  
CCCGTGGCCCAACCCGTAAGGGGGGGAGCGGTGCAAGGTGGGACTGGCGATTGGGACGAAGTCGTAACAA  
GGTAGCCGTACCGGAAGGTGCGGCTGGATCACCT

>gb|CP000850.1|:222623-224141 *Salinispora arenicola* CNS-205, complete  
genome  
TTTGTGGAGAGTTTGATCCTGGCTCAGGACGAACGCTGGCGGCGTGCTTAACACATGCAAGTCGAGCGG  
AAAGGCCCTTCGGGGTACTCGAGCGGCGAACGGGTGAGTAACACGTGAGTAACCTGCCCCAGGCTTTGGG  
ATAACCCCGGGAAACCGGGGCTAATACCGGATATGACCATCTGTCGCATGGTGGGTGGTGGAAAGATTTT  
TTGGCTTGGGATGGGCTCGCGGCCTATCAGCTTGTGGTGGGGTGTAGGCCTACCAAGGCGGCGACGGGT  
AGCCGGCCTGAGAGGGCGACCGGCCACACTGGGACTGAGACACGGCCAGACTCCTACGGGAGGCAGCAG  
TGGGGAATCTTGCACAATGGGCGGAAGCCTGATGCAGCGACGCCGCGTGAGGGATGACGGCCTTCGGGTT  
GTAAACCTCTTTCAGCAGGGACGAAGCGTTTGTGACGGTACCTGCAGAAGAAGCGCCGGCCAACTACGTG  
CCAGCAGCCGCGTAAGACGTAGGGCGCAAGCGTTGTCCGGATTTATTGGGCGTAAAGAGCTCGTAGGCG  
GCTTGTGCGTGCAGTGTGAAAACCCGTGGCTCAACTGCGGGCTTGCACTGATACGGGCAGGCTAGAGT  
TCGGTAGGGGAGACTGGAATTCCTGGTGTAGCGGTGAAATGCGCAGATATCAGGAGGAACACCGGTGGCG  
AAGGCGGGTCTCTGGGCCGATACTGACGCTGAGGAGCGAAAGCGTGGGGAGCGAACAGGATTAGATAACC  
TGGTAGTCCACGCTGTAAACGTTGGGCGCTAGGTGTGGGGGGCCTCTCCGGTTCTCTGTGCCGAGCTAA  
CGCATTAAGCGCCCCGCCTGGGGAGTACGGCCGCAAGGCTAAAACCTCAAAGGAATTGACGGGGGCCCGCA  
CAAGCGGCGGAGCATGCGGATTAATTCGATGCAACGCGAAGAACCTTACCTGGGTTTGACATCGCCCGGAA  
ATCCTTCAGAGATGGGGGTCTTTCGGGGCCGGTACAGGTGGTGCATGGCTGTCGTCAGCTCGTGTGCTG  
GAGATGTTGGGTTAAGTCCCGCAACGAGCGCAACCCCTTGTTCGATGTTGCCAGCGGTTATGGCGGGGAC  
TCATCGAAGACTGCCGGGTCAACTCGGAGGAAGGTGGGGATGACGTCAAGTCATCATGCCCTTATGTC  
CAGGGCTTCACGCATGCTACAATGGCCGGTACAGTGGGCTGCGATACCCTGAGGTGGAGCGAATCCCAA  
AAGCCGGTCTCAGTTCGGATCGGGGTCTGCAACTCGACCCCGTGAAGTCCGAGTTCGCTAGTAATCGCAGA  
TCAGCAACGCTGCGGTGAATACGTTCCCGGGCCTTGTACACACCGCCCGTCACGTCACGAAAGTCGGCAA  
CACCCGAAGCCGTTGGCCTAACCCCTTGTGGGGGGAGCCGTGCAAGGTGGGGCTGGCGATTGGGACGAAGT  
CGTAACAAGGTAGCCGTACCGGAAGGTGCGGCTGGATCACCTCCTTTCT

>gi|343198502|ref|NR\_042724.1| *Salinispora tropica* CNB-440 strain  
CNB440 16S ribosomal RNA, partial sequence  
AGAGTTTGATCCTGGCTCAGGACGAACGCTGGCGGCGTGCTTAACACATGCAAGTCGAGCGGAAAGGCC  
TTCGGGGTACTCGAGCGGCGAACGGGTGAGTAACACGTGAGTAACCTGCCCCAGGCTTTGGGATAACCC  
GGGAAACCGGGGCTAATACCGGATATGACTGGCTGCCGCATGGTGGTTGGTGGAAAGATTTTTTGGCTTG

GGATGGGCTCGCGCCTATCAGCTTGTGGTGGGGTGATGGCCTACCAAGGCGGCGACGGGTAGCCGGCC  
TGAGAGGGCGACCGGCCACACTGGGACTGAGACACGGCCCAGACTCCTACGGGAGGCAGCAGTGGGGAAT  
CTTGACAATGGGCGGAAGCCTGATGCAGCGACGCCGCGTGAGGGATGACGGCCTTCGGGTTGTAAACCT  
CTTTCAGCAGGGACGAAGCGTTTGTGACGGTACCTGCAGAAGAAGCGCCGGCCAACACTACGTGCCAGCAGC  
CGCGGTAAGACGTAGGGCGCAAGCGTTGTCCGGATTTATTGGGCGTAAAGAGCTCGTAGGCGGCTTGTGCG  
CGTGCAGTGTGAAAACCCGTGGCTCAACTGCGGGCTTGCAGTCGATACGGGCAGGCTAGAGTTCGGTAGG  
GGAGACTGGAATTCCTGGTGTAGCGGTGAAATGCGCAGATATCAGGAGGAACACCGGTGGCGAAGGCGGG  
TCTCTGGGCCGATACTGACGCTGAGGAGCGAAAGCGTGGGGAGCGAACAGGATTAGATAACCCTGGTAGTC  
CACGCTGTAAACGTTGGGCGCTAGGTGTGGGGAGCCTCTCCGGTTCTCTGTGCCGAGCTAACGCATTAA  
GCGCCCCGCTGGGGAGTACGGCCGCAAGGCTAAAACCTCAAAGGAATTGACGGGGGCCCGCACAAGCGGC  
GGAGCATGCGGATTAATTCGATGCAACGCGAAGAACCTTACCTGGGTTTGACATCGCCGGAAATCCTTCA  
GAGATGGGGGTCCTTCGGGGCCGGTGACAGGTGGTGCATGGCTGTGTCGTCAGCTCGTGTGAGATGTT  
GGGTTAAGTCCCAGCAACGAGCGCAACCCTTGTTCGATGTTGCCAGCGCCTTATGGCGGGGACTCATCGAA  
GACTGCCGGGGTCAACTCGGAGGAAGGTGGGGATGACGTCAAGTCATCATGCCCTTATGTCCAGGGCTT  
CACGCATGCTACAATGGCCGGTACAATGGGCTGCGATACCGTGAGGTGGAGCGAATCCCAAAAAGCCGGT  
CTCAGTTCGGATCGGGGTCTGCAACTCGACCCCGTGAAGTCGGAGTCGCTAGTAATCGCAGATCAGCAAC  
GCTGCGGTGAATACGTTCCCGGGCCTTGTACACACCGCCCGTCACGTCACGAAAGTCGGCAACACCCGAA  
GCCGGTGGCCTAACCTTGTGGGGGGAGCCGTCGAAGGTGGGGCTGGCGATTGGGACGAAGTCGTAACAA  
GGTAGCCGTA

>gi|343202671|ref|NR\_043072.1| *Stackebrandtia nassauensis* DSM 44728  
strain NRRL B-16338 16S ribosomal RNA, partial sequence

TGACCTGGCTCAGGACGAACGCTGGCGGCGTGCTTACACATGCAAGTCGAACGGAAAGGCCCTTTCGGG  
GGTACTCGAGTGGCGAACGGGTGAGTAACACGTGAGTAATCTGCCTTTGGCTTTGGGATAAGCCTCGGAA  
ACGGGGTCTAATACCGGATACGACATCTTCTCGCATGAGACGGGTGTGAAAGTTTTTTCGGCTGAAGATG  
GGCTCGCGGTCTATCAGCTTGTGGTGGGGTAATGGCTCACCAAGGCTTTGACGGGTAGCCGGCCTGAGA  
GGGCGACCGGCCACACTGGGACTGAGACACGGCCCAGACTCCTACGGGAGGCAGCAGTGGGGAATATTGC  
GCAATGGGCGAAAGCCTGACGCAGCGACGCCGCGTGAGGGATGACGGCCTTCGGGTTGTAAACCTCTTTC  
GGTAGGGACGAAGTGAATGACGGTACCTGCAGAAGAAGCTCCGGCTAACTACGTGCCAGCAGCCGCGG  
TAAGACGTAGGGAGCAAGCGTTGTCCGGATTTATTGGGCGTAAAGGGCTCGTAGGCGGCTTGTACGCTCT  
GTCGTGAAAGATCAGGGCTTAACTCTGGTTTTGCGGTGGATACGGGCAGGCTTGAGGCAAGTAGGGGAGA  
TCGGAATTCATGTGTAGCGGTGAAATGCGCAGATATGTGGAGGAACACCGGTGGCGAAGGCGGATCTCT  
GGGCTTGTCTGACGCTGAGGAGCGAAAGCGTGGGGAGCGAACAGGATTAGATAACCCTGGTAGTCCACGC  
TGTAACCGGTGGGCGCTAGGTGTGGGGTACATTTGTTGGTTCCGTGCCGTAGCTAACGCATTAAGCGCC  
CCGCCTGGGGAGTACGGCCGCAAGGCTAAAACCTCAAAGGAATTGACGGGGGCCCGCACAAGCGGCGGAGC  
ATGCGGATTAATTCGATGCAACGCGAAGAACCTTACCTGGGTTTGACATCACCCGGAAACACCTGGAGAC  
AGGTGCCTCTTCGGATCGGGTGCAGGTGGTGCATGGCTGTGTCGTCAGCTCGTGTGAGATGTTGGGTT  
AAGTCCCGCAACGAGCGCAACCCTTATCCTATGTTGCCAGCGCCTTATGGCGGGGACTCATGGGAGACTG  
CCGGGGTCAACTCGGAGGAAGGTGGGGATGAGGTCAAGTCATCATGCCCTTATGTCCAGGGCTTACGC  
ATGCTACAATGGCCGTACAGAGGGCTGCGATACCGTGAGGTGGAGCGAATCTCGTAAAGCCGGTCTCAG  
TTCGGATCCAGTCTGCAACTCGACTGGGTGAAGTCGGAGTCGCTAGTAATCGCAGATCAGCAACGCTGC  
GGTGAATACGTTCCCGGGCCTTGTACACACCGCCCGTCACGTCATGAAAGTCGGCAACACCCGAAGCCG  
TGGCCTAACCCCTCGTGGGATGGAGCGGTGCAAGGTGGGGCTGGCGATTGGGACGAAGTCGTAACAAGGT  
AGCCGTACCGAAGGTGCGGC

>gi|48948|emb|X60514.1| *S.coelicolor* rRNA 16S gene

GACGACCGCACCGCGCTCGGTGATGTGCTGACCCGCCTCCTGCGCAGGGTGGAGCACGCACAGCCGGACC  
GCGGTGGCCGGCTCAGCGACCTCGATTAAAGATCTTGACAGCGACGCTTGACAGCCCTCTGCGGGATCCG  
TAAGGTTCTTCGGGTTGCCACGGGACCGTAACGGTTCTTCGGCAGCACCTCCCGCCGAGCAGCGAATCA  
AACCACCAGCACGACCCCAAGTGGGAATGACTTCGGCGCGCCCGAATTCAATTCCGCTGGGTACTCGTC  
GGCCCGATCGACCCCGATTGGGAATCGCCGAGAGGGTCCGCTAAGGTTTGAGACGTCGGAACGGCCCAAC  
AGCCGGGACGACAACCCCTCCTGACGGGGAATCAGGGCCCCGAAAGGATCTGATAGAGTCGGAACCGCCGG  
AAAGGGAAACGCGGAAGCGGGAACCTGGAAAGCACCGAGGAAATCGGATCGGAAAGATCTGATAGAGTCG  
GAAACGCAAGACCGAAGGGAAGCGCCCGAGGAAAGCCACGAGAGTCTCCTGGGTGAGTACAAAGGAAG  
CGTCCGTTCTTGAGAACTCAACAGCGTGCCAAAAGTCAACGCCAGATATGTTGATACCCCGACCTGATC  
GGATCTCCGTTTCGGGTTGAGGTTCTTTGAAGTAACACAACAGCGAGGACGCTGTGAACGGTCGATTAT  
TCCTCCGACTGTTCCGCTCTCGTGGTGTACCCGATTACGGGTATACATTACGGAGAGTTTGTATCCTGG  
CTCAGGACGAACGCTGGCGGCGTGCTTAACACATGCAAGTCGAACGATGAACCACTTCGGTGGGGATTAG  
TGGCGAACGGGTGAGTAACACGTGGGCAATCTGCCCTTCACTCTGGGACAAGCCCTGGAAACGGGGTCTA  
ATACCGGATACTGACCCTCGCAGGCATCTGCGAGGTTGCAAAAGCTCCGGCGGTGAAGGATGAGCCCGCGG

CCTATCAGCTTGTGGTGAGGTAATGGCTCACCAAGGCGACGACGGGTAGCCGGCCTGAGAGGGCGACCG  
GCCACACTGGGACTGAGACACGGCCAGACTCCTACGGGAGGCAGCAGTGGGGAATATTGCACAATGGGC  
GAAAGCCTGATGCAGCGACGCCGCTGAGGGATGACGGCCTTCGGGTTGTAAACCTCTTTCAGCAGGGAA  
GAAGCGAAAGTGACGGTACCTGCAGAAGAAGCGCCGGCTAACTACGTGCCAGCAGCCGCGTAATACGTA  
GGGCGCAAGCGTTGTCCGGAATTATTGGGCGTAAAGAGCTCGTAGGCGGCTTGTACGTCGGTTGTGAAA  
GCCCCGGGCTTAACCCCGGGTCTGCAGTCGATACGGGCAGGCTAGAGTTCGGTAGGGGAGATCGGAATTC  
CTGGTGTAGCGGTGAAATGCGCAGATATCAGGAGGAACACCGGTGGCGAAGGCGGATCTCTGGGCCGATA  
CTGACGCTGAGGAGCGAAAGGCTGGGGAGCGAACAGGATTAGATACCCTGGTAGTCCACGCCGTAAACGG  
TGGGCACTAGGTGTGGGCAACATTCCACGTTGTCCGTGCCGAGCTAACGCATTAAGTCCCCGCCTGGG  
GAGTACGGCCGCAAGGCTAAAACCTCAAAGGAATTGACGGGGCCCCGCACAAGCGGGCGGAGCATGTGGCTT  
AATTCGACGCAACGCGAAGAACCTTACCAAGGCTTGACATACACCGGAAAGCATCAGAGATGGTGGCCCC  
CTTGTGGTTCGGTGTACAGGTGGTGCATGGCTGTTCGTGAGTTCGGTTCGGTTCGGTTCGGTTCGGTTCGG  
CAACGAGCGCAACCCTTGTCCCGTGTTCAGCAAGCCCTTCGGGGTGTGGGGACTCACGGGAGACCGC  
CGGGGTCAACTCGGAGGAAGGTGGGGACGAAGGCAAGTCATCATGCCCTTATGTCTTGGGCTGCACACG  
TGCTACAATGGCCGGTACAATGAGCTGCGATACCGCAAGGTGGAGCGAATCTCAAAAAGCCGGTCTCAGT  
TCGGATTGGGGTCTGCAACTCGACCCCATGAAGTCGGAGTCGCTAGTAATCGCAGATCAGCATTGCTGCG  
GTGAATACGTTCCCGGGCTTGTACACACCGCCCGTCACGTACGAAAAGTCGGTAACACCCGAAGCCGGT  
GGCCCAACCCTTGTGGGAGGGAGCTGTGCAAGGTGGGACTGGCGATTGGGACGAAGTCGTAACAAGGTA  
GCCGTACCGGAAGGTGCGGCTGGATCACCTCCTTTCTAAGGAGCACATAGCCGACTGCAG

>Streptomyces griseoflavus Tu4000

CTGGCGCGTGCTTAACACATGCAAGTCGAACGATGAACCACTTCGGTGGGGATTAGTGGCGAACGGGTG  
AGTAACACGTGGGCAATCTGCCCTGCACTCTGGGACAAGCCCTGGAAACGGGGTCTAATACCGGATACTG  
ACCCGCCTGGGCATCCAGGCGGTTTCGAAAGCTCCGGCGGTGCAGGATGAGCCCGCGGCTATCAGCTTGT  
TGGTGTAGGTAATGGCTCACCAAGGCGACGACGGGTAGCCGGCCTGAGAGGGCGACCGGCCACACTGGGAC  
TGAGACACGGCCAGACTCCTACGGGAGGCAGCAGTGGGGAATATTGCACAATGGGCGAAAAGCCTGATGC  
AGCGACGCCGCTGAGGGATGACGGCCTTCGGGTTGTAAACCTCTTTCAGCAGGGAAGAAGCGAAAGTGA  
CGGTACCTGCAGAAGAAGCGCCGGCTAACTACGTGCCAGCAGCCGCGTAATACGTAGGGCGCGAGCGTT  
GTCCGGAATTATTGGGCGTAAAGAGCTCGTAGGCGGCTTGTACGTCGGTTGTGAAAAGCCCGGGCTTAA  
CCCCGGGTCTGCAGTCGATACGGGCAGGCTAGAGTTCGGTAGGGGAGATCGGAATTCCTGGTGTAGCGGT  
GAAATGCGCAGATATCAGGAGGAACACCGGTGGCGAAGGCGGATCTCTGGGCCGATACTGACGCTGAGGA  
GCGAAAGCGTGGGGAGCGAACAGGATTAGATACCCTGGTAGTCCACGCCGTAAACGGTGGGCACTAGGTG  
TGGGCGACATTCACGTCGTCCGTGCCGAGCTAACGCATTAAGTGGCCCGCTGGGGAGTACGGCCGCA  
AGGCTAAAACCTCAAAGGAATTGACGGGGGCCCGCACAAGCGGCGGAGCATGTGGCTTAATTCGACGCAAC  
GCGAAGAACCTTACCAAGGCTTGACATACACCGGAAAGCATTAGAGATAGTGGCCCTTGTGGTTCGGT  
TACAGGTGGTGCATGGCTGTTCGTGAGTTCGGTTCGGTTCGGTTCGGTTCGGTTCGGTTCGGTTCGGT  
CCTTGTCCCGTGTTCAGCAGGCCCTTGTGGTGTGGGACTCACGGGAGACCAGCCGGGTCAACTCGG  
AGGAAGGTGGGGACGACGTCAAGTCATCATGCCCTTATGTCTTGGGCTGCACACGTGCTACAATGGCCG  
GTACAATGAGCTGCGATACCGCGAGGTGGAGCGAATCTCAAAAAGCCGGTCTCAGTTCGGATTGGGGTCT  
GCAACTCGACCCCATGAAGTCGGAGTCGCTAGTAATCGCAGATCAGCATTGCTGCGGTGAATACGTTCCC  
GGCCTTGTACACACCGCCCGTCACGTACGAAAAGTCGGTAACACCCGAAGCCGGTGGCCCAACCCTTG  
TGGGAGGGAGCTGTGCAAGGTGGGACTGGCGATTGGGACGAAGTCGTAACAAGGTAGCCGTAC

>Streptomyces sp. AA4

GACGAACGCTGGCGGCGTGCTTAACACATGCAAGTCGAACGCTGAACCGGTTTCGGCCGGGGATGAGTGG  
CGAACGGGTGAGTAACACGTGGGTAATCTGCCCTGACTCTGGGATAAGCCTGGGAAACTGGGTCTAATA  
CCGGATACGACCACTACAGGCATCTGTGGTGGTGGAAAGTTCCGGCGGTATGGGATGAACCCGGCCCTA  
TCAGCTTGTGGTGGGTAATGGCCTACCAAGGCGACGACGGGTAGCCGGCCTGAGAGGGTACCCGGCCA  
CACTGGGACTGAGACACGGCCCATTTTTCCTACGGGGTGCAGCAGTGGGGAATATTGTTTCTATTGGGCG  
CAAGCCTGATGCAGCGACGCCGCTGAGGGATGACGGCCTTCGGGTTGTAAACCTCTTTCGCCAGGGACG  
AAGCGCAAG

>gi|282153487|gb|GU225938.1| Streptomyces zinciresistens K42 16S  
ribosomal RNA gene, partial sequence

GCACTTGCCTGCTTACCATGCAAGTCGAACGATGAACCACTTCGGTGGGGATTAGTGGCGAACGGGTGA  
GTAACACGTGGGCAATCTGCCCTCACTCTGGGACAAGCCCTGGAAACGGGGTCTAATACCGGATAATAC  
TTCTGCCTGCATGGGCGGGGTTGAAAGCTCCGGCGGTGAAGGATGAGCCCGCGGCTATCAGCTTGTG  
GTGAGGTAACGGCTCACCAAGGCGACGACGGGTAGCCGGCCTGAGAGGGCGACCGCCACACTGGGACTG  
AGACACGGCCAGACTCCTACGGGAGGCAGCAGTGGGGAATATTGCACAATGGGCGGAAGCCTGATGCAG  
CGACGCCGCTGAGGGATGACGGCCTTCGGGTTGTAAACCTCTTTCAGCAGGGAAGAAGCGAGAGTGCAG  
GTACCTGCAGAAGAAGCGCCGGCTAACTACGTGCCAGCAGCCGCGTAATACGTAGGGCGCAAGCGTTGT



CCGGAATTATTGGGCGTAAAGAGCTCGTAGGCGGCTTGTTCGGTTCGGTTGTGAAAGCCCGGGCTTAACC  
CCGGGTCTGCAGTCGATACGGGCAGGCTAGAGTTCGGTAGGGGAGATCGGAATTCCTGGTGTAGCGGTGA  
AATGCGCAGATATCAGGAGGAACACCCGGTGGCGAAGGCGGATCTCTGGGCCGATACTGACGCTGAGGAG  
CGAAAGCGTGGGGAGCGAACAGGATTAGATACCCTGGTAGTCCACGCCGTAAACCGGTGGGCAC TAGGTGT  
GGGCAACATTCCACGTTGTCCGTGCCGCAGCTAACGCATTAAGTCCCCGCCTGGGGAGTACGGCCGCAA  
GGCTAAAACCTCAAAGGAATTGACGGGGGCCCGCACAAAGCGGCGGAGCATGTGGCTTAATTCGACGCAACG  
CGAAGAACCTTACCAAGGCTTGACATACACCGGAAAACCTGGAGACAGGGTCCCCCTTGTGGTTCGGTGT  
ACAGGTGGTGCATGGCTGTTCGTACGCTCGTGTTCGTGAGATGTTGGGTTAAGTCCCCGCAACGAGCGCAACC  
CTTGTCCCCGTGTTGCCAGCAGGCCCTTGTGGTGTTCGGGACTCACGGGAGACCGCCGGGGTCAACTCGGA  
GGAAGGTGGGGACGACGTCAAGTCATCATGCCCTTATGTCTTGGGCTGCACACGTGCTACAATGGCCGG  
TACAATGAGCTGCGATACCGCGAGGTGGAGCGAATCTCAAAAAGCCGGTCTCAGTTCGGATTGGGGTCTG  
CAACTCGACCCCATGAAGTCGGAGTCGCTAGTAATCGCAGATCAGCATTGCTGCGGTGAATACGTTCCCG  
GGCCTTGTACACACCGCCCGTCACGTCACGAAAGTCGGTAAACACCCGAAGCCGGTGGCCCAACCCCTTGT  
GGGAGGGAGCTGTTCGAAGGTGGGACTGGCGATGGACGAAGTCGAACAAAGTGGTGAGGTG  
>gi|1297280|gb|U48996.1|SRU48996 Streptosporangium roseum 16S rRNA gene  
GCAAGTCGAGCGGAAAGGCCCTTCGGGGTACTCGAGCGGCGAACGGGTGAGTAACACGTGAGTAACCTGC  
CCCTGACTCTGGGATAAGCCCCGGGAAAACCTGGGTCTAATACCGGATACGACACCGTTCCCGATGGGATGGG  
TGGTGGAAAAGTTTTTTCGTTTGGGGATGGACTTGCGGCCTATCAGCTTGTGGTGGGGTAACGGCCTACC  
AAGGCGACGACGGGTAGCCGGCCTGAGAGGGCGACCGGCCACACTGGGACTGAGACACGGCCCAGACTCC  
TACGGGAGGCAGCAGTGGGGAATATTGCGCAATGGGCGAAAAGCCTGACGCAGCGACGCCCGTGGGGGAT  
GACGGCCTTCGGGTTGTAAACCTCTTTCAGCAGGGACGAAGTTGACGTGTACCTGCAGAAGAAGCGCCGG  
CTAACTACGTGCCAGCAGCCGCGGTAATACGTAGGGCGCAAGCGTTGTCCGGAATTATTGGGCGTAAAGA  
GCTCGTAGGTGGCTTGTACGTCCGGTGTGAAAGCTTGGGGCTTAACTCCAGGTCTGCATTCGATACGGG  
CTGGCTAGAGGTAGGTAGGGGAGAACGGAATTCCTGGTGTAGCGGTGAAATGCGCAGATATCAGGAGGAA  
CACCGGTGGCGAAGGCGGTTCTCTGGGCCCTTACCTGACGCTGAGGAGCGAAAAGCGTGGGGAGCGAACAGG  
ATTAGATACCTTGGTAGTCCACGCCGTAAACGTTGGGCGCTAGGTGTGGGGACCTTCCACGTTTCCGC  
GCCGTAGCTAACGCATTAAGCGCCCCGCCCTGGGGAGTACGGCCGCAAGGCTAAAACCTCAAAGGAATTGAC  
GGGGGCCGACAAGCGGCGGAGCATGTTGCTTAATTCGACGCAACGCGAAGAACCTTACCAAGGCTTGAC  
ATCGCCCGGAAACACTAGAGATGGGTGCCCTTTCGGATCGGGTGACAGGTGGTGCATGGCTGTTCGTACG  
TCGTGTTCGTGAGATGTTGGGTTAAGTCCCGCAACGAGCGCAACCCCTTGTTCATGTTGCCAGCACGCTCC  
TTCGGGGTGGTGGGACTCATGGGAGACTGCCGGGTCAACTCGGAGGAAGGTGGGGATGACGTCAAGTC  
ATCATGCCCTTATGTCTTGGGCTGCAACATGCTACAATGGCCGGTACAGAGGGTTGCGATACCGCAAG  
GTGGAGCGAATCCCAAAAAGCCGGTCTCAGTTCGGATTGGGGTCTGCAACTCGACCCCATGAAGTCGGAG  
TCGCTAGTAATCGCAGATCAGCAACGCTGCGGTGAATACGTTCCCGGGCCTTGTACACACCGCCCGTAC  
GTCACGAAAGTCGGCAACACCCGAAGCCCGTGGCCCAACCTTTGGGGGGGAGCGGTGCAAGGTGGGGCT  
GGCGATTGGGACG  
>gb|CP000088.1|:2390559-2392029 Thermobifida fusca YX, complete genome  
ACGAACGCTGGCGGCGTGCTTAACACATGCAAGTCGAGCGGTAAGGCCCTTCGGGGGTACACGAGCGGC  
GAACGGGTGAGTAACACGTGAGTAACCTGCCCTGACTCTGGGATAAGCCTGGGAAACTGGGTCTAATAC  
CGGATATGACCTCGTGCCGCATGGTGTGGGGTGGAAAGGTGTTTTTCCGGTCAGGGATGGGCTCGCGGCC  
TATCAGCTTGTGGTGGGGTAAACGGCTACCAAGGCGATGACGGGTAGCCGGCCTGAGAGGGCGACCGGC  
CACACTGGGACTGAGACACGGCCAGACTCCTGCGGGAGGCAGCAGTGGGGAATATTGCGCAATGGGCGG  
AAGCCTGACGCAGCGACGCCCGGTGGGGGATGAAGGCCTTCGGGTTGTAAACCTCTTTTACCACTCACGA  
AGGCCCTGGTTTTCTGGGGGTTGACGGTAGGTGGTGAATAAGGACCGGCTAACTACGTGCCAGCAGCCG  
CGGTAATACGTAGGGTCCGAGCGTTGTCCGGAATTATTGGGCGTAAAGAGCTCGTAGCGGCCCTGTCCGG  
TCTGCTGTGAAAGTCCGGGCTTAACTCCGGGTGTCAGTGGATACGGGCAGGCTTGGGTAGGTAGGTAGGGG  
AGACTGGAATTCCTGGTGTAGCGGTGAAATGCGCAGATATCAGGAGGAACACCGGTGGCGAAGGCGGGTCT  
TCTGGCCCTTACCTGACGCTGAGGAGCGAAAGCGTGGGGAGCGAACAGGATTAGATACCTTGGTAGTCCA  
CGCCGTAAACGTTGGGCGCTAGGTGTGGGACTTTCCACGGTTTCCGTGCCGTAGCTAACGCATTAAGCG  
CCCCGCCTGGGGAGTACGGCCGCAAGGCTAAAACCTCAAAGGAATTGACGGGGGCCCGCACAAAGCGGCGGA  
GCATGTTGCTTAATTCGACGCAACGCGAAGAACCTTACCAAGGCTTGACATCACCGGTAATCCTCCAGAG  
ATGGGGGCTCCTTCGGGGATCGGTGACAGGTGGTGCATGGCTGTTCGTACGCTCGTGTTCGTGAGATGTTGG  
GTTAAGTCCCGCAACGAGCGCAACCCCTGTCCCATGTTGCCAGCACGTGGTGGTGGGGACTCATGGGAGA  
CTGCCGGGGTCAACTCGGAGGAAGGTGGGGATGACGTCAAGTCATCATGCCCTTATGCCTTGGGCTGCA  
AACATGCTACAATGGCCGGTACAGAGGGCGTGCATGTTCGTGAGGCGGAGCGAATCTCTTAAAGCCGGTCT  
TCAGTTCGGATTGGGGTCTGCAACTCGACCCCATGAAGGTGGAGTCGCTAGTAATCGCGGATCAGCAACG  
CCGCGGTGAATACGTTCCCGGGCCTTGTACACACCGCCCGTACGTCACGAAAGTCGGCAACACCCGAAA  
CACGTGGCCTAACCTTTGTGGGGGGGAGCGTGTGAAGGTGGGGCTGGCGATTGGGACGAAGTCGTAACA

A

>gb|CP001874.1|:443556-445080 *Thermobispora bispora* DSM 43833, complete genome

AGAGTTTGATCCTGGCTCAGGACGAACGCTGGCGGCGTGCTTAACACATGCAAGTCGAGCGAGGACCGCA  
CCTTCGGGTGTGGAGCCGAGCGGCGAACGGGTGAGTAACACGTGAGCAACCTGCCCTGGCACCGGGATA  
GCCCCGGGAAACTGGGATTAATACCGGATACGACCCTTCCCGCATGGGATGGTGGTGGAAAGGTTCCCC  
CTTGTGGGGTTCGGGCCAGGGATGGGCTCGCGGCCCATCAGCTAGTTGGCGGGGTAACGGCCCACCAAGG  
CGATGACGGGTAGCCGGCCTGAGAGGGCGGTGGCCACACTGGGACTGAGACACGGCCCAGACTCCTACG  
GGAGGCAGCAGTGGGGAATATTGCGCAATGGGCGGAAGCCTGACGCAGCGACGCCCGGTGGGGGATGAAG  
GCCTTCGGGTGTAAACCTCTTTCAGCAGGGACGAAGTTGACGTGTACCTGCAGAAGAAGCGCCGGCCAA  
CTACGTGCCAGCAGCCGCGTAATACGTAGGGCGGAGCGTTGTCCGGAGTTACTGGGCGTAAAGGGCTC  
GTAGGCGGCTTGTGCGCTCGGCTGTGAAAGCCACGGCTTAACCGTGGAAATTGCAGTCGATACGGGCAGG  
CTAGAGGGCGGCAGAGGGGAGTGAATTCCTGGTGTAGCGGTGAAATGCGCAGATATCGGGAGGAACACC  
GGTGGCGAAGGCGGCTCCCTGGGCCGTCCCTGACGCTGAGGAGCGAAAGCGTGGGGAGCGAACAGGATTA  
GATACCCTGGTAGTCCACGCCGTAAACGTTGGGCGCTAGGTGTGGGGATCTTTTGTGATCTCCGTGCCGT  
AGCTAACGCATTAAGCGCCCCGCCTGGGGAGTACGGCCGCAAGGCTAAAACCTCAAAGGAACTGACGGGGG  
CCCCGACAAGCGGCGGAGCATGTTGCTTAATTCGATGCAACCGGAAGAACCTTACCAGGGCTTGACATGC  
TGGGAAATCCCGCAGAGATGCGGGGTGCCCTTCGGGCGTCCAGCACAGGTGGTGCATGGCTGTCGTCAGCT  
CGTGTGCTGAGATGTTGGGTAAAGTCCCGCAACGAGCGCAACCCCCACCTATGTTGCCAGCGGGTTATG  
CCGGGCACTCATGGGAACTGCCGGGGTCAACCCGGAGGAAGGCGGGGACGACGTCAAGTCATCATGCC  
CTTATGCCCTGGGCTGCAAACATGCTACAATGGCCGGTACAATGGGCTGCGATCCCGTGAGGGTGAGCGA  
ATCCCCAAAGCCGGTCCAGTTCGGATCGGGGTCTGCAACTCGACCCCGTGAAGTCGGAGTCGCTAGTAA  
TCGCGGATCAGCAATGCCGCGGTGAATACGTTCCCGGGCTTTGTACACACCGCCCGTACGTCCTGAAAG  
TCGGCAACACCCGAAGCCGGTGGCCTAACCCCTTTTGGGGGAGGGAGCCGTGGAAGGTGGGGCTGGTG  
ATTGGGACGAAGTCGTAACAAGGTAGCCGTACCGGAAGGTGCGGCTGGATCACCT

>gb|CP001738.1|:898387-899905 *Thermomonospora curvata* DSM 43183, complete genome

AGAGTTTGATCCTGGCTCAGGACGAACGCTGGCGGCGTGCTTAACACATGCAAGTCGAGCGGAAAGGCC  
CTTCGGGGTACTCGAGCGGCGAACGGGTGAGTAACACGTGAGTAACCTGCCCTCGACTCTGGGATAAGC  
CTGGGAAACTGGGTCTAATACCGGATATTCACCTTCTGTGCGATGGTGGGGGGTGGAAAGTTCCTCTTT  
TTGGGGGTTCGTCGGGGATGGGCTCGCGCCATCAGCTTGTGGTGGGGTGACGGCCTACCAAGGCCA  
CGACGGGTAGCCGGCCTGAGAGGGCGACCGGCCACACTGGGACTGAGACACGGCCCAGACTCCTACGGGA  
GGCAGCAGTGGGGAATCTTGCAGCAATGGGCGAAAGCCTGACGCAGCGACGCCCGGTGGGGGATGAAGGCC  
TTCGGGTGTAAACCCCTTTCAGCACCGACGAAGTTTGGACGGTAGGTGCAGAAGAAGCGCCGGCTAACT  
ACGTGCCAGCAGCCGCGTAATACGTAGGGCGGAGCGTTGTCCGGAATTATTGGGCGTAAAGAGCTCGT  
AGGCGGCTTGTGCGCTCTGTGCTGAAAGCCACGGCTTAACCGTGGGTTTGCAGGTGGATACGGGCAGGCT  
AGAGGCAGGTAGGGGAGCATGGAATTCCTGGTGTAGCGGTGAAATGCGCAGATATCGGGAGGAACACCGG  
TGGCGAAGGCGGTGCTCTGGGCTGTTCTGACGCTGAGGAGCGAAAGCGTGGGGAGCGAACAGGATTAGA  
TACCCTGGTAGTCCACGCCGTAAACGTTGGGCGCTAGGTGTGGGGTTCCTCCACGGATTCCGCGCCGTAG  
CTAACGCATTAAGCGCCCCGCCTGGGGAGTACGGCCGCAAGGCTAAAACCTCAAAGGAAATTGACGGGGGCC  
CGCACAAGCGGCGGAGCATGTTGCTTAATTCGACGCAACCGGAAGAACCTTACCAAGGCTTGACATCACC  
CGAAAACCTGCAGAGATGCAGGGTCCCTTCGGGGGCGGGTGCAGGTGGTGCATGGCTGTGTCAGCTCG  
GGGACTCATGGAAGACCGCCGGGTCAACTCGGAGGAAGGTGGGGACGACGTCAAGTCATCATGCCCT  
TATGCTTGGGCTGCAAACATGCTACAATGGCCGGTACAGAGGGCTGCGATACCGTGAGGTGGAGCGAAT  
CCCTAAAAGCCGGTCTCAGTTCGGATCGAAGTCTGCAACTCGACTTCGTGAAGTCGGAGTCGCTAGTAA  
CGCAGATCAGCAACGCTGCGGTGAATACGTTCCCGGGCCTTGTACACACCGCCCGTACGTCACGAAAGT  
CGGCAACACCCGAAGCCCGTGGCCTAACCCGTAAGGGGGGAGCGGTGGAAGGTGGGGCTGGCGATTGGG  
ACGAAGTCGTAACAAGGTAGCCGTACCGGAAGGTGCGGCTGGATCACCT

>gb|CP002638.1|:2336703-2338222 *Verrucosipora maris* AB-18-032, complete genome

TTGGAGAGTTTGATCCTGGCTCAGGACGAACGCTGGCGGCGTGCTTAACACATGCAAGTCGAGCGGAAAG  
GCCTTTCGGGTACTCGAGCGGCGAACGGGTGAGTAACACGTGAGCAACCTGCCCTAGGCTTTGGGATAA  
CCCTCGGAAACGGGGCTAATACCGAATATTCATCATGGGCGCATGTTTGTGGGTGGAAAGTTTTTTCGG  
CTTGGGATGGGCTCGCGCCTATCAGCTTGTGGTGGGGTAATGGCCTACCAAGGCGACGACGGGTAGCC  
GGCCTGAGAGGGCGACCGGCCACACTGGGACTGAGACACGGCCCAGACTCCTACGGGAGGCAGCAGTGGG  
GAATATTGCACAATGGGCGGAAGCCTGATGCAGCGACGCCCGGTGAGGGATGACGGCCTTCGGGTGTAA  
ACCTCTTTCAGCAGGGACGAAGCGCAAGTGACGGTACCTGCAGAAGAAGCGCCGGCCAACTACGTGCCAG

CAGCCGCGGTAAGACGTAGGGCGCGAGCGTTGTCCGGATTTATTGGGCGTAAAGAGCTCGTAGGCGGCTT  
GTCGCGTCGACTGTGAAAACCCGTGGCTCAACTGCGGGCCTGCAGTCGATACGGGCAGGCTAGAGTTCGG  
TAGGGGAGACTGGAATTCCTGGTGTAGCGGTGAAATGCGCAGATATCAGGAGGAACACCCGGTGGCGAAGG  
CGGGTCTCTGGGCCGATACTGACGCTGAGGAGCGAAAGCGTGGGGAGCGAACAGGATTAGATAACCTGGT  
AGTCCACGCTGTAAACGTTGGGCGCTAGGTGTGGGGGGCCTCTCCGGTTCCTGTGCCGCAGCTAACGCA  
TTAAGCGCCCCGCCTGGGGAGTACGGCCGCAAGGCTAAAACCTCAAAGGAATTGACGGGGGCCCGACAAG  
CGGCGGAGCATGCGGATTAATTCGATGCAACGCGAAGAACCTTACCTGGGTTTTGACATCGCCGAAATCC  
TGCAGAGATGTGGGGTCCTTCGGGGCCGGTGGCAGGTGGTGCATGGCTGTCGTGAGCTCGTGTGCGTGAGA  
TGTTGGGTAAAGTCCCGCAACGAGCGCAACCCTCGTCCCATGTTGCCAGCAATTCGGTTGGGGACTCATG  
GGAGACTGCCGGGGTCAACTCGGAGGAAGGTGGGGATGACGTCAAGTCATCATGCCCTTATGTCCAGGG  
CTTCACGCATGCTACAATGGCCGGTACAATGGGCTGCGATACCGTGAGGTGGAGCGAATCCCAAAAAGCC  
GGTCTCAGTTCGGATCGGGGTCTGCAACTCGACCCCGTGAAGTCGGAGTCGCTAGTAATCGCAGATCAGC  
AACGCTGCGGTGAATACGTTCCCGGGCCTTGTACACACCGCCCGTCACGTCACGAAAAGTCGGCAACCCC  
GAAGCCGGTGGCCAACCCTTGTGGAGGGAGCCGTCGAAGGTGGGGCTGGCGATTGGGACGAAATCGTAA  
CAAGGTAGCCGTACCGGAAGGTGCGGCTGGATCACCTCCTTTCTAAGGAG

**Supplemental Data file 2. RpoB protein sequences from actinomycetes used as input for Figure 2.**

>gi|117927508|ref|YP\_872059.1| DNA-directed RNA polymerase subunit beta [Acidothermus cellulolyticus 11B]

MVDREPWKEPHLAASGSTMINGPLAPHRVSFAKIHPEPLDLPNLLALQIESFDWLVGNDAWKARVEAALA  
AGRTDVNTSSGLEEIFEESIPIEDISGTMSLSFRDHRFEPKNTPDECRERDFTYSAPLFTAEFVNNTT  
GEIKSQTVFMGDFPLMTEKGTFIINGTERVVVSQLVRSFGVYFDRTVDKTSDRDIYGCKIIPSRGAWLEL  
EIDKRDNVGVRIDRKRKQSVTVLLKALGWDDARILERFGEFEAIRATLEKDHVHTQEEALLDIYRKL RPG  
EPPTYEAAQTLLNNLYFNPKRYDLAKVGRYKVNKKLGLDLPYTQNTL TEEDIVATIDYLVRLHAGQTETT  
RNGRTVIEETDDIDHFGNRRRLRTV GELIQNQIRLGLARMERVVRE RMTTQDIVAITPQTLINIRPVVASI  
KEFFGTSQLSQFMDQTNPLAGLTHKRRLNALGPGGLSRERAGFEVRDVHPSHYGRMCPIETPEGPNIGLI  
GSLATHGRVNAFGFVETPYRKVINGRVTDQVDYLTADEEDRHVIAQANAPLNEDGSFAEERVLVRRGGE  
VDYVHPSTVDYMDVSPRQMVSVATALIPFLEHDDANRALMGSNMQRQAVPLLR AEAPLVGTGMEFRAAVD  
AGDVVIASKAGVVEVSADAITIAADDGTRQTYRLAKFRRSNQGTCINQKPIVDEGQORVEAGQPIADGPC  
TQGGELALGRNLLVAFMSWEGHNYEDAIIISERLVKEDILSSIHIEEHEVDARDTKLGPEEITRDIPNVS  
EEILADLDERGIIRIGADVPGDILVGKVT PKGETELTPEERLLRAIFGEKAREVRDTS LKVPHGESGKV  
IDVKVFTRDDAELPPGVNELVRVYVAQKRKITDGDKLAGRHGNKGVIAKILPEEDMPFLEDGTPVDIILN  
PLGVPGRMNVGQVLETHLGWAAKSGWKVELNGQPEGWRKRLADIGALDAPPNTLVATPVFDGAKEDEIRG  
LLENALPNSDGLRMVGPDGKARLFDGRTGEPYPEPISVGYIYIMKLHHLVDDK LKHARSTGPYSMITQQPL  
GGKAQFGGQRFGEVWALEAYGAAYALQELLTIKSDDVLGRVKVYEAIVKGENIPEPGIPESFKVLVKE  
MQALCLNVEVLSSDGMTVEMRET DDEVFRAAEELGIDL SRREPSVVEEI

>gi|383775764|ref|YP\_005460330.1| rpoB gene product [Actinoplanes missouriensis 431]

MAASRPAKTSRTSSAYAPRRVSFGRITEQLEVPNLLALQTD SFDWLVGNEAWQARTTDDPHAHSGLA EIL  
EEISPIEDFSGTMSLSFSAPRFDEVKASIEECKEKLTYCAPLFTAEFTNNTTGEIKSQTVFMGDFPMM  
TPKGT FVINGTERVVVSQLVRSFGVYFTKEPKTSDRDLTSVKVIPSRGAWLEFDIDKRDTVGVRI DRKR  
RQAVTVLLKAIGWSADQIRERFGWSELMTTLEKDHIAGQDEALLDIYRKL RPEGPPTRENAQTLLDNLF  
FNP KRYDVAKVGRYKFNKLEIDVPIVRGTLSEEDIVKTVDYLCRLHAGEEGYEADDIDHFGNRRRLRTV G  
ELIQNQVRVGLSRMERVVRE RMTTQDVEAITPQTLINIRPVVAAIKEFFGTSQLSQFMDQTNPLAGLTHR  
RRLSALGPGGLSRERAGFEVRDVHPSHYGRMCPIETPEGPNIGLIGALSTFARVNPFGF IETPYRKVEN G  
VVTDEVHYLTADEEDRFIKAQANAVLSSDNTFAEDRVLVRRKGG EVDYVPGGEVDYMDVSPRQMTSVATA  
MIPFLEHDDANRALMGANMQRQAVPLVKAESPLVGTGMEYRAAVDAGDVVVAE VGGVVEDLCADYVTVHQ  
DDGHRRTYLLHKFRRSNAGSCVNQKPVVFE GDRVEAGQVIADGPCTDEGEMALGRNLLVAFMCWEGHNYE  
DAIILSQR LVQQDVLTSIHIEEHEVDARDTKLGPEEITRDIPNVSEEMLADLDERGIIRIGAEVVPGDIL  
VGKVT PKGETELTPEERLLRAIFGEKAREVRDTS LKVPHGGETGTVIGVRTFSREDGDELPPGVNELVRVY  
VAQKRKI QDGDKLAGRHGNKGVISKILPVEDMPFLEDGTPVDIVLNPLGVP SRMNIGQVLETHLGWIAKT  
GWSVEGEDADWKRQLRAIEAHESPADSNVATPVFDGAQEEEIKGLLESTLVNRD GKRLVNGDGKAQLFDG  
RSGEPLPDPISVGYVYILKLNHLVDDKIHARSTGPYSMITQQPLGGKAQFGGQRFGE MECWAMQAYGAAY  
ALQELLTIKSDDVLGRVKVYEAIVKGENIPEPGIPESFKVLLKELQSLCLNVEVLSSDGVALEMRET DDE  
VFRAAEELGIDL SRPNEGVSSVVEEI

>gi|386845725|ref|YP\_006263738.1| DNA-directed RNA polymerase subunit beta [Actinoplanes sp. SE50/110]

MAASRPAKTSRTSSAYAPRRVSFGRITEQLEVPNLLALQTD SFDWLVGNEAWQARTTDDPHAHSGLA EIL  
EEISPIEDFSGTMSLSFSAPRFDEVKASIEECKEKLTYCAPLFTAEFTNNTTGEIKSQTVFMGDFPMM  
TPKGT FVINGTERVVVSQLVRSFGVYFTKEPKTSDRDLTSVKVIPSRGAWLEFDIDKRDTVGVRI DRKR  
RQAVTVLLKAIGWSADQIRERFGWSELMTTLEKDHIAGQDEALLDIYRKL RPEGPPTRENAQTLLDNLF  
FNP KRYDVAKVGRYKFNKLEIDVPIVRGTLSEEDIVKTV EYLCRLHAGEEGYEADDIDHFGNRRRLRTV G  
ELIQNQVRVGLSRMERVVRE RMTTQDVEAITPQTLINIRPVVAAIKEFFGTSQLSQFMDQTNPLAGLTHR  
RRLSALGPGGLSRERAGFEVRDVHPSHYGRMCPIETPEGPNIGLIGALSTFARVNPFGF IETPYRKVEN G  
VVTDEVHYLTADEEDRYIKAQANAVLSSDNTFAEDRVLVRRKGG EVDYVPGTEVDYMDVSPRQMTSVATA  
MIPFLEHDDANRALMGANMQRQAVPLVKAESPLVGTGMEYRAAVDAGDVVVAE VAGVVEDLCADYVTVHQ  
DDGHRRTYLLHKFRRSNAGSCVNQKPVVFE GDRVEAGQVIADGPCTDEGEMALGRNLLVAFMCWEGHNYE  
DAIILSQR LVQQDVLTSIHIEEHEVDARDTKLGPEEITRDIPNVSEEMLADLDERGIIRIGAEVVPGDIL  
VGKVT PKGETELTPEERLLRAIFGEKAREVRDTS LKVPHGGETGTVIGVRTFSREDGDELPPGVNELVRVY  
VAQKRKI QDGDKLAGRHGNKGVISKILPVEDMPFLEDGTPVDIVLNPLGVP SRMNIGQVLETHLGWIAKT

GWSIEGDDEEWKRQLRSIEAHESPADSNVATPVFDGAQEEEIKGLLESTLVNRDGGKRLVNGDGKAQLFDG  
RSGEPLPDFISVGYVYILKLNHLVDDKIHARSTGPYSMITQQPLGGKAQFGGQRFGECEWAMQAYGAAY  
ALQELLLTIKSDDLGRVKVYEAIVKGENIPEPGIPESFKVLLKELQSLCLNVEVLSSDGVALEMRETDE  
VFRAAEELGIDLRRPNNEGVSSVEEI

>gi|256380610|ref|YP\_003104270.1| DNA-directed RNA polymerase subunit  
beta [Actinosynnema mirum DSM 43827]

MAISRATKATAATNSTSGIPGAPKRVSFAKIHLEPLQTPNLLDLQIQSFEWLTGDEAWFQRRVDEGDEAPT  
GGLEEVLNIEISPIEDFSGSMSLSFSAPRFDEVKASTEECKDKDMTYAAPLFVTAEFVNNNTGEIKSQT  
MGDFPMMTDKGTFFIINGTERVVVSQLVRSQVYVYDIAIDKTTDKDVFVSVKIIPSRGAWLEFDVDRD  
VRIDRKRQPVTVLLKALGWSTEQIRERFSFSETLLTTLEKDHTAGTDEALLDIYRKLRPGEPTKES  
ALLETLFFKEKRYDLAKVGRYKVNKKLGLDTPISTGVLTEDDIVTTIEYLVRLHAGETSMQPGETE  
VVEVDDIDHFGNRRRLRTVGELIQNQIRVGLSRMERVVRRERMTTQDVEAITPQTLINIRPVVAAI  
KEFFGTSQLSQFMDQTNPLAGLTHKRRLSALGPGGLSRERAGMEVRDVHPSHYGRMCPIETPEGPN  
IGLIGSLSSYGRVNPFGFIETPYRKVVDGRVTDQIDYLTADEEDRYVKAQANARIDGEGNFLE  
GKVLVRKKGGGEVEMIDPRVDYMDVSPRQMVSAATAMIPFLEHDDANRALMGANMQRQAVPLLRSE  
SPLVGTGMELRAAVDAGDVVAKKTGVVEEISADYVTMADDGSRQTYGMHKFRRSNQGTCINQKPI  
VNEGDQVKVGVVLADGPTENGEMALGKNLLVAIMPWEHNYEDAILLSQRLVQDDVLT  
SIHIEEHEIDARDTKLGAEIITRDIPNVSEEVLDLDERGIIRIGAEVQPGDILVGKVT  
PKGETELTPEERLLRAIFGEKAREVRDTSKLVPHGEYGVIGIRVFSREDDDELPPGVNEL  
VRVYVAQKRKIQDGDKLAGRHGKNGVIGKILPVEDMPFLEDGTPVDIVLNTHGVP  
RRMNIGQVLETHLGIWIAKQGSINGDPDWAKNLPADLYEVDPGTKTATPVFDGAREE  
EITGLLGSTVPNRDGERMVKENGKAQLFDGRSGEPYFPVSVGYMYILKLLHLVDDKIHARST  
GPYSMITQQPLGGKAQFGGQRFGECEWAMQAYGAAYTLQELLLTIKSDDLGRVKVYEAIVK  
GENIPEPGIPESFKVLLKELQSLCLNVEVLS SDGAAIEMRDGDEDLERAAANLGINLSR  
SESPVDDVVN

>gi|399534473|ref|YP\_006547135.1| DNA-directed RNA polymerase subunit  
beta [Amycolatopsis mediterranei S699]

MAVSPANQATAATTSAESRSEATGIPGAPKRVSFAKIREPLNTPNLLDVQIQSFQWFTGDEAWFQRRV  
EEGEENPVGGLEEVLNIEISPIEDFSGSMSLSFSAPRFDEVKASIEECKDKDMTYAAPLFVTA  
EFVNNNTGEIKSQTVFLGDFPVMTDKGTFFIINGTERVVVSQLVRSQVYVYDIAIDKTTDKD  
VFSVRVIPSARGAWLEFDVDRDVRIDRKRQPVTVLLKALGWTTTEAIRERFSFSETLLATLE  
KDHTAGTDEALLDIYRKLRPGEPTKESAQTLLENLFFKAKRYDLAKVGRYKVNKKLGLSTPI  
ENGLTTEEDIVTTIEYLVRLHAGEDKMTAANTEIPVETDDIDHFGNRRIRTVGELIQNQIR  
VGLSRTERVVRRERMTTQDVEAITPQTLINIRPIGAAIKEFFGTSQLSQFMQQTNPIDGL  
THKRRLLNALGPGGLSRERAGMEVRDVHPSHYGRMCPIETPEGPNIGLIGSLCSYARVNP  
FGFIETPYRKVVEGRVTDQIDYLTADEEDRFVKAQANAPISDDGTFIEDRVMARRKGG  
EVELIDPLDIDYMDVSPRQMVSIATAMIPFLEHDDANRALMGANMQRQAVPLLRSQAPYV  
GTGVELRAAIDSGDMLVAEQSGVVEELSADLITVMHDDGTRKSYSLYKFRRSNHGTCFN  
HRPIVNEGDRIEAGQVIADGPSTENGEVALGKNLLVAVMPWEHNYEDAILSERLVQDDV  
LTSIHIEEHEIDARDTKLGAEIITRDIPNVSEEVLDLDERGIIRIGAEVRDGDILVGKVT  
PKGETELTPEERLLRAIFGEKAREVRDTSKLVPHGETGKVIIGIRVFSREDDDELPPGV  
NELVRVYVAQKRKIQDGDKLAGRHGKNGVIGKILPVEDMPFLEDGTPVDIILNTHGVP  
RRMNIGQVLEHLGLWLASQGWTEGDPDWAKNLSAELRDVAPGTNTATPVFDGAKEEELT  
GLLSATKPNRDGERMVKENGKANLFDGRSGEPYFPVAVGYMYILKLLHLVDDKIHARST  
GPYSMITQQPLGGKAQFGGQRFGECEWAMQAYGAAYTLQELLLTIKSDDLGRVKVYEAIVK  
GENIPEPGIPESFKVLLKELQSLCLNVEVLS SDGSSIEMRSDDEDLERAAANLGINLSR  
NESPSVDDVVH

>gi|300782587|ref|YP\_003762878.1| DNA-directed RNA polymerase subunit  
beta [Amycolatopsis mediterranei U32]

MAVSPANQATAATTSAESRSEATGIPGAPKRVSFAKIREPLNTPNLLDVQIQSFQWFTGDEAWFQRRV  
EEGEENPVGGLEEVLNIEISPIEDFSGSMSLSFSAPRFDEVKASIEECKDKDMTYAAPLFVTA  
EFVNNNTGEIKSQTVFLGDFPVMTDKGTFFIINGTERVVVSQLVRSQVYVYDIAIDKTTDKD  
VFSVRVIPSARGAWLEFDVDRDVRIDRKRQPVTVLLKALGWTTTEAIRERFSFSETLLATLE  
KDHTAGTDEALLDIYRKLRPGEPTKESAQTLLENLFFKAKRYDLAKVGRYKVNKKLGLSTPI  
ENGLTTEEDIVTTIEYLVRLHAGEDKMTAANTEIPVETDDIDHFGNRRIRTVGELIQNQIR  
VGLSRTERVVRRERMTTQDVEAITPQTLINIRPIGAAIKEFFGTSQLSQFMQQTNPIDGL  
THKRRLLNALGPGGLSRERAGMEVRDVHPSHYGRMCPIETPEGPNIGLIGSLCSYARVNP  
FGFIETPYRKVVEGRVTDQIDYLTADEEDRFVKAQANAPISDDGTFIEDRVMARRKGG  
EVELIDPLDIDYMDVSPRQMVSIATAMIPFLEHDDANRALMGANMQRQAVPLLRSQAPYV  
GTGVELRAAIDSGDMLVAEQSGVVEELSADLITVMHDDGTRKSYSLYKFRRSNHGTCFN  
HRPIVNEGDRIEAGQVIADGPSTENGEVALGKNLLVAVMPWEHNYEDAILSERLVQDDV  
LTSIHIEEHEIDARDTKLGAEIITRDIPNVSEEVLDLDERGIIRIGAEVRDGDILVGKVT  
PKGETELTPEERLLRAIFGEKAREVRDTSKLVPHGETGKVIIGIRVFSREDDDELPPGV  
NELVRVYVAQKRKIQSGDKLAGRHGKNGVIGKILPVEDMPFLEDGTPVDIILNTHGVP  
RRMNIGQVLEHLGLWLASQGWTEGDPDWAKNLSAELRDVAPGTNTATPVFDGAKEEELT  
GLLSAT

KPNRDGERMVKENKANLFDGRSGEPYPYPVAVGYMYILKLHHLVDDKIHARSTGPYSMITQQPLGGKAQ  
FGGQRFGEMECWAMQAYGAAYTLQELLTIKSDDVVRVKVYEAIVKGENIPEPGIPESFKVLLKELQSLC  
LNVEVLSDDGSSIEMRSDDEDLERAAANLGINLSRNESSVDDVVH

>gi|379737650|ref|YP\_005331156.1| rpoB gene product [Blastococcus  
saxobsidens DD2]

MAGSRPTSINPSTTESGPFQGNQSPVSGPRTGEADQAKIPGAPIRVSFAKISEPLAVPDLALQ TASFD  
WLVGSPDWRATLSPEEQADAVGGLAEILEEISPIEDFSGSMSLSFSNPRFEDVKASLEECKDKDMTYAAP  
LFVTAEFMNNNTGEIKSQTVFMGDFPIMTNKGT FVINGTERVVVSQ LVRSPGVYFDKTLDKTSDKDVFA  
KVIPSRGAWLEFDVDRDITVGVRI DRKRRQPVTVLLKALGWGEDR IREHFQWSPTVLATLEKDHIAGQDE  
ALLDIYRKL RPGEPTRESAQALLENLFFNPKRYDLAKVGRYKVKKLGVDVPQSTSTLTEDDIVATIEY  
VVRLHAGEPDHGTDDIDHFGNRRLR TVGELIQNQIRVGLSRMERVVREMTTQDVEAITPQTLINIRPVV  
ASIKEFFGTSQLSQFMDQTNPLAGLTHKRRLSALGPGGLSRERAGMEVRDVHPSHYGRMCPIETPEGPNI  
GLIGSLSSFRVNPFGFIETPYRKVENGT VTTQIDYLTADEEDRFVVAQANSPLDAQGR LAEERVLVRTK  
GGEVDYLAPENVYMDVSPRQMTSVATAMIPFLEHDDANRALMGANMQRQAVPLLRSEAPLVGTGMELRA  
AVDAGDVVVAEKAGVVEDSTADYVTVMADDGTRQTYRLLKFRRSNQGTSINQSPVVDEGQRVEVGQVIAD  
GPCTDQGEMALGKNLLVAFMPWEGHNYEDAIILSQR LVQDDVLSIIHIEEFVDARDTKLGAEIETRDIP  
NVSEDLVADLDERGIIRIGAEVVPGDILVGKVT PKGETELTPEERLLRAIFGEKAREVRDTSKVKHGES  
GKVI GVRVFSREDGDELPAVNELIRVYVAQMRKISDGDKLAGRHGNKGVISKILPQEDMPFLEDGTPVD  
IVLNPLGVPGRMNVGQVLETHLGWVAKQGWQVEGNPDWAKNLPEAAKSAGPGTRTATPVFDGAREEEIVG  
LLGSTTPNRDGD RMVKETGKARLFDGRSGEPFPEPISVGYVYILKLLHHLVDDKIHARSTGPYSMITQQPL  
GGKAQFGGQRFGEMECWAMQAYGAAYALQELLTIKSDDILGRVKVYEAIVKGENIPEPGIPESFKVLLKE  
LQSLCLNVEVLSGDGQAIELRDTDEVFRAAEELGIDLSRREPSSVEDV

>gi|256390126|ref|YP\_003111690.1| DNA-directed RNA polymerase subunit  
beta [Catenulispora acidiphila DSM 44928]

MAASRTAQNITKNAARRISFAKIKEPLEVPNLLALQTESFDWL VGNATWKGRVSEQQAAGLDVPTTSGLE  
EIFEEISPIEDFQGTMSLTFRDHRFEPAKYSIDECKDRDFTYAAPLFVTAEFNTNETGEIKSQTVFMGDF  
PLMTNKGTFIINGTERVVVTQLVRSPGLYFSQDIDKTS DKDVFNAKIIPSRGAWLEFEIDKRD MVGVRVD  
RKRKQHVTVLLKALGWDDARILEEFGEYESMRQTLEKDHTAGQDEALLDIYRKL RPGEPTTRESAAQTLLD  
NLYFNPKRYDLAKVGRYKIDKKLQASGIDNTVLTEDDIVNAIKFLVKLHAGETEMDPQAE GMPMVVVEE  
DDIDHFGNRRLR SVGELIQNQVRTGLARMERVVREMTTQDVEAITPQTLINIRPVVASIKEFFGTSQLS  
QFMDQTNPLSGLTHKRRLNALGPGGLSRERAGFEVRDVHPSHYGRMCPIETPEGPNI GLIGSLASYGRIN  
AFGFIETPYRKVEDGRVTDHIDYLTADEEDRYVVAQANAPVRDDGSYTDERVL CRRKGGIEEMPADID  
YMDVSPRQMVSVATAMIPFLEHDDANRALMGANMMRQAVPLLQSDSPYVGTGMEYRCAVDAADVVTADKG  
GVVTEVSADLVTVANDDATT SVYRIAKFRRSNQGTSFNQKVVVAEGERVEVGSVLADGPCTQDGEMALGK  
NLLVAFMPWEGHNYEDAIILSQR LVQDDVLSIIHIEEHEVDARDTKLGPEEITRDIPNVSEEV LADLDER  
GIIRIGADVVPGDILVGKVT PKGETELTPEERLLRAIFGEKAREVRDTSKVP HGEQGKIIGVRIFDRDS  
GDELPPGVNQLVRVYVAQKRKITHGDKLAGRHGNKGVIAKILPVEDMPFLEDGTPVDIVLNPLGVP SRMN  
PGQVLETHLGWIAATGWDVGE GNAEWQERLRSIGADSAAPKTKVATPVFDGAREDEITGLLGNTL KTRDG  
VRLVDSTGKARMF DGRSGEPFPYPISVGYMYILKLHHLVDDKLHARSTGPYSMITQQPLGGKAQFGGQRF  
GEMEVWALEAYGAAYALQELLTIKSDDVLGRVKVYEAIVKGDNIPEPGIPESFKVLIKEMQSLCLNVEV  
SKDGTMIELRDTDEDFRAAEELGIDLSRREPSSVEEV

>gi|332669509|ref|YP\_004452517.1| DNA-directed RNA polymerase subunit  
beta [Cellulomonas fimi ATCC 484]

MAASRTPSAPTADAIANRTASRRISFAKIH EPLEVPDLLGLQTESFDWLLGNERWQARVAAALEAGRQDV  
PETAGLEEI FEEISPIEDFSGSMSLSFREHRFEPKYTAEECKEKDFTYAAPLFVTAEFVNYTTGEIKSQ  
TVFMGDFPLMTERGTFIINGTERVVVSQ LVRSPGVYFERMADKTS DKDILTAKVIPSRGAWLEFEIDKRD  
NVGVRVDRKRKQ NATVLLKALGMTEAE IREEFAAYPAVIETLEKDHVQTQDEALLDLYRKIRPGEPTVE  
AGRALIENFYFNPKRYDLAKVGRYKLNKKGQDAPLADSVLTLADVVATIKYLASLHIDLPTLPGTRAGE  
AIEIRVETDDIDHFGNRRIRAVGELIQNQVRTGLSRMERVVREMTTQDVEAITPQTLINIRPVVASIKE  
FFGTSQLSQFMDQNNPLAGLTHKRRLSALGPGGLSRDRAGMEVRDVHPSHYGRMCPIETPEGPNI GLIGS  
LASFGRINPFGFVETPYRKVV DGRVTDEVHYLTADDED RHVIAQANAPLLEDGTFEEDRVLVRKGGIE  
YVTGENIDYMDVSPRQMVSVATAMIPFLEHDDANRALMGANMQRQAVPLVRSEAPLVGTGMERRAAVDAG  
DVIVATKPGVVTEVSADLIVTANDDATTSTYRVAKFRRSNQGTSYNQRVLVDTGARVEVGSVLADGPATD  
EGELALGRNLLVAFMSWEGHNYEDAIILSQR LVQDDVLSIIHIEEHEVDARDTKLGPEEITRDIPNVSEE  
VLADLDERGIIRIGAEVAAGDILVGKVT PKGETELTPEERLLRAIFGEKAREVRDTSKVP HGESGTVIE  
VRTFSREDGDELPAVNELVRVYIAQRK I TDGDKLAGRHGNKGVISKILPVEDMPFLADGTPVDVVLNP  
LGVPGRMNVGQVLETHLGWVAKQGWDI ELAEGDVSWREGVPAVAAKSPAGNPVATPVFDGVPEETLTGLL  
GSTLPNRDGER TVQQDGKARLFDGRSGEPFPDPAVAVGYMYILKLHHLVDDKIHARSTGPYSMITQQPLGG



KAQFGGQRFGEMEVWALEAYGAAYTLQELLLTIKSDDVPGRVKVYEAIVKGENIPDSGIPESFKVLLKEMQ  
SLCLNVEVLSSDGVSIDMKENDDEVYRAAEELGIDLRRPNASSIEEI  
>gi|296130503|ref|YP\_003637753.1| unnamed protein product [Cellulomonas  
flavigena DSM 20109]  
MAASRIPTAPSADAIANRTASRRISFAKIHPELEVPDLLGLQTESFDWLLGNERWQARVAAALEVGRNDV  
PETAGLEEIFEEISPIEDFGGTMSLSFREHRFEPKPYTAEECKEKDFTFAPLFFVTAEFVNYTTGEIKSQ  
TVFMGDFPLMTERGTFIINGTERVVVSQVLRSPGVYFERTADKTSKDVLTAKVIPSRGAWLEFEIDKRD  
NVGVRVDRKRKQONATVLLKALGMTESEIREEFAEYPAVIDTLEKDHVQTQDEALLDLYRKIRPGEPTVE  
AGRALLENFYFNPORYDLAKVGRYKLNKKGQDAPLSDSVLALSDVVATIKYLAALHIDKPTLPGRGGQ  
AVEIRVEPDDIDHFGNRRIRAVGELIQNQVRTGLSRMERVVREMTTQDVEAITPQTLINIRPVVASIKE  
FFGTSQLSQFMDQNNPLAGLTHKRRLSALGPGGLSRDRAGMEVRDVHTSHYGRMCPIETPEGPNIIGLIGS  
LATYGRINPFGFVETPYRRVVDGKVTEVDYLTADDEDRHVIAQANAPLNADGSFTESTVLRVTKGGEPT  
LVPGANVDYMDVSPRQMVSVATALIPFLEHDDANRALMGANMQRQAVPLVRSEAPLVGTGMERRAAVDAG  
DVVVATKAGVVTEVSADLTVANDDATTSTYRIAKFRRSNQGTCYNQVRLVEHGARVEPGSVLADGPATD  
EGELALGRNLLVAFMSWEGHNYEDAIILSQRVQDDVLSIIHEEHEVDARDTKLGPEEITRDIPNVSEE  
VLGDLDERGIIRIGAEVAAGDILVGKVTGKGETELTPEERLLRAIFGEKAREVRDTSKLVPHGESGTVIE  
VRTFSRDDGDELPAQVNELVRVYIAQRRKITDGDKLAGRHGNKGVISKILPVEDMPPLEDGTPVDVVLNP  
LGVPGRMNVGQVLETHLWVAKQGWDIELAEGEATWRDGPVAVAAARSTPGNPVATPVFDGVPPEETLTGLL  
STTLPNRDGERTVKGDKARLFDGRSGEPFPEPVSVGYMYILKLHHLVDDKIHARSTGPYSMITQQPLGG  
KAQFGGQRFGEMEVWALEAYGAAYTLQELLLTIKSDDVPGRVKVYEAIVKGENIPDSGIPESFKVLLKEMQ  
SLCLNVEVLSSDGVSIDMKENDDEVYRAAEELGIDLRRPNASSIEEI  
>gi|336319916|ref|YP\_004599884.1| DNA-directed RNA polymerase, beta  
subunit [Cellulomonas gilvus ATCC 13127]  
MAASRTPSAPTADAIANRTASRRISFAKIYEPLEVPDLLGLQTESMDWLLGNERWQARVAAALEAGRNDV  
PQTAGLEEIFEEISPIEDFGGTMSLSFREHRFEPKPYTAEECKEKDFTFAPLFFVTAEFVNYTTGEIKSQ  
TVFMGDFPLMTERGTFIINGTERVVVSQVLRSPGVYFERTADKTSKDVLTAKVIPSRGAWLEFEIDKRD  
NVGVRVDRKRKQONATVLLKALGMTEGEIREEFAAYPAVIDTLEKDHVQTQDEALLDLYRKIRPGEPTVE  
AGRALIENFYFNSKRYDLAKVGRYKVNKKGQDAPLSDSVLSLSDVVATIKYLAALHIDQAALPGTRNGE  
AIEVRVETDDIDHFGNRRIRAVGELIQNQVRTGLSRMERVVREMTTQDVEAITPQTLINIRPVVASIKE  
FFGTSQLSQFMDQNNPLAGLTHKRRLSALGPGGLSRDRAGMEVRDVHPSHYGRMCPIETPEGPNIIGLIGS  
LASFGRINPFGFVETPYRKYVVKGVTEVHYLTADDEDRHVIAQANAPLKANGEFEEESRVLVTRTKGGEID  
YVTGETVDYMDVSPRQMVSVATALIPFLEHDDANRALMGANMQRQAVPLVRSEAPLVGTGMERRAAIDAG  
DVIIVATKPGVVTEVSADLITVANDDATTTTYRVAKFRRSNQGTSYNQVRLVDHGARVEVGSVLADGPATD  
EGELALGRNLLVAFMSWEGHNYEDAIILSQRVQDDVLSIIHEEHEVDARDTKLGPEEITRDIPNVSEE  
VLADLDERGIIRIGAEVAGDVLVGKVTGKGETELTPEERLLRAIFGEKAREVRDTSKLVPHGESGTVIE  
VRTFSRDDGDELPAQVNELVRVYIAQRRKITDGDKLAGRHGNKGVISKILPVEDMPPFLADGTAVDVVLNP  
LGVPGRMNVGQVLETHLWVAKQGWDIQLAEGDVSWRDGVPDVAASSPAGNPVATPVFDGVPPEETLAGLL  
GTTLPNRDGVRTVGPDKARLFDGRSGEPFDPVSVGYMYILKLHHLVDDKIHARSTGPYSMITQQPLGG  
KAQFGGQRFGEMEVWALEAYGAAYTLQELLLTIKSDDVPGRVKVYEAIVKGENIPDSGIPESFKVLLKEMQ  
SLCLNVEVLSSDGVSIDMKENDDEVYRAAEELGIDLRRPNASSVEEI  
>gi|111220537|ref|YP\_711331.1| rpoB gene product [Frankia alni ACN14a]  
MAASRSSRISFAKIIPELEVPDLLALQTSFDWLLIGSDAWAERVQEAIDSGRDDVPITSGLEEVFEEIS  
PIEDFSGSMSLSFRDHRFEPKPYSVVECKDKDMTFSAPLFFVTAEFNTNTTGEIKSQTVFMGDFPLMTPKG  
TFVINGTERVVVSQVLRSPGVYFERSLDKASDKDLYSCKVIPSRGAWLEFEIDKRDTVGVIRDRKRRQSV  
TVLLKALGWDEARILERFGDFPSMRITLEKDHTASQDDALLDIYRKLRPGEPTRESAQTLLENLFFNPK  
RYDLAKVGRYKVNKLTLEIAHDVGVLTEDDIVRTIEYVVKLHAGADPAEYEVDDIDHFGNRRLRVTVGEL  
IQNQVRLGLARMERVVREMTTQDVEAITPQTLINIRPVVASIKEFFGTSQLSQFMDQTNPLAGLTHKRR  
LSALGPGGLSRERAGFEVRDVHPSHYGRMCPIETPEGPNIIGLIGSLTFARVNPFGFVETPYRKYVNGRV  
TDQIDYLTADDEDRHVKAQANTPLSPDGTFAEDRVLVRRKGGEVEFIPPDEVDYMDVSPRQMVSVATAMI  
PFLEHDDANRALMGSNMQRQSVPLLRSEAPLVGTGMERRAAKADAGDVVVCVQAGVEDLSADYITVMHDD  
GTRRTYRLAKFRRSNQGTCINQKPIVFEGRVEAGQVIADGPCTDNGEMALGKNLLVAFMPWEGHNYEDA  
IILSQRVQDDVLSIIHEEHEVDARDTKLGPEEITRDIPNVAEEVLADLDERGIIRIGAEVSPGDVLVG  
KVTPKGETELTPEERLLRAIFGEKAREVRDTSKLVPHGESGKVIQVRFVRSREDGDELPPGVNELVRVYVA  
QKRKITDGDKLAGRHGNKGVIAKILPQEDMPPLEDGTPVDIVLNPHGVPRRMNIGQILETHLWVAKTGW  
QVDAGTEDWKERLRGIGADSSTPGTNVATPVFDGAREEEITGLLDSTLPNRDGVQLIGSSGKATLFDGRT  
GEPYPYPVAVGYIYILKLLHHLVDDKIHARSTGPYSMITQQPLGGKAQFGGQRFGEMEVWALEAYGAAYAL  
QELLLTIKSDDVPGRVKVYEAIVKGENIPEPGIPESFKVLIKEMQSLCLNVEVLSSDGQVIEMRDTEDEVF  
RAAEELGIDLRRREPSSVEEV

>gi|86739286|ref|YP\_479686.1| DNA-directed RNA polymerase subunit beta [Frankia sp. Cc13]

MAASRSSSRISFAKIIIEPLEVDPDLLALQTQSFDWLIIGSDAWAERVQEAIIDSGRDDVPIITSGLEEVFKEISP  
IEDFSGSMSLSFRDHRFEPPKYSVEECKDKDMTFSAPLFTVAEFTNNTTGEIKSQTVFMGDFPLMTPKGT  
VINGTERVVVSQVLRSPGVYFERSLDKASDKDLYSCKVIPSARGAWLEFEIDKRDTVGVRIIDRKRQSVTVL  
LKALGWDEARILERFGDFPSMRITLEKDHTAGQDDALLDIYRKLRPGEPPPTRESAQTLLENLFFNPKRYDL  
AKVGRYKVNKKLSLGVADHDVGVLTENDIVRTIEYVVKLHAGADPAEYEVDDIDHFGNRRIRITVGEIIONQV  
RLGLARMERVVRRMTTQDVEAITPQTLINIRPVVASIKEFFGTSQLSQFMDQTNPLAGLTHKRRLNALGP  
GGLSRERAGFEVRDVHPSHYGRMCPIETPEGPNIIGLIGSLSTFARVNPFGFIETPYRKVENGRVTGQIDWL  
TADEEDRHVKAQANTPLRPDGSFAEDRVLVRRKGGEVEFIPPDEVDYMDVSPRQMVSVATAMIPFLEHDDA  
NRALMGSNMQRQSVPLLRSEAPLVGTGMEARAADKAGDVVCAQAGVVEDLSADYITVMHDDGTRRTYRLA  
KFRRSNQGTICINQKPIVNEGDRVGAGQVIADGPCTDNGEMALGKNLLVAFMPWEGHNYEDAIIILSQRLVQD  
DVLSSIHIEEHEVDARDTKLGPPEEITRDI PNVAEEVLADLDERGIIRIGAEVSPGDVLVGVKVTPKGETELT  
PEERLLRAIFGEKAREVRDTSCLKVPHGESGKVIIGRVVFSREDGDELPPGVNELVRVYVAQKRKITDGDKLA  
GRHGNGVIAKILPAEDMPFLEDGTPVDVVLNPHGVPRRMNIGQILETHLGVAKTGWQVDSGTEDWKERL  
RGIGADAASAGTNVATPVFDGAREEEITGLLDSTLPNRDGIQILIGSSGKAKLFDGRTGEPYPYPVAVGYIY  
ILKLLHLVDDKIHARSTGPYSMITQQPLGGKAQFGGQRFGEMEVWALEAYGAAYALQELLTIKSSDDVGRV  
KVYEAIVKGENIPEPGIPESFKVLIKEMQSLCLNVEVLSSDGVQIEMRDTDEDVFRAAEELGIDLSRREPS  
SVEEV

>gi|358459761|ref|ZP\_09169955.1| DNA-directed RNA polymerase subunit beta [Frankia sp. CN3]

MAASRSASRISFAKIVEPLEVDPDLLALQTQSFDWLIIGSDTWQERVQESIDAGRDDVPLTSGLEEVFEEIS  
PIEDFSGSMSLSFRDHRFEPPKYSVEECKDKDMTYSAPMFVTAEFTNNTTGEIKSQTVFMGDFPLMTPKG  
TFVINGTERVVVSQVLRSPGVYFEKSLDKTSDKDLFSCVKVIPSARGAWLEFEIDKRDTVGVRIIDRKRQSV  
TVLLKALGWDEARILERFGDYPSMRVTLEKDHTAGQDDALLDIYRKLRPGEPPPTRESAQTLLENLFFNPK  
RYDLAKVGRYKVNKKLGLHVEGPVGVLTEDDVRTIEYVVKLHEGIDPAYEVDDIDHFGNRRLRITVGEI  
QNQVRLGLARMERVVRRMTTQDVEAITPQTLINIRPVVASIKEFFGTSQLSQFMDQTNPLAGLTHKRRL  
SALGPGGLSRERAGMEVRDVHPSHYGRMCPIETPEGPNIIGLIGSLSTFARVNPFGFVETPYRKVVAGRVT  
DQIDYLTADEEDRHVVAQANAPLTGDGSFAEDRVLVRRKGGEVEFIPPDEVDYMDVSPRQMVSVATAMIP  
FLEHDDANRALMGSNMQRQSVPLLRSEAPLVGTGMEARAADKAGDVVCAQAGVVEDLSADYITVMHDDG  
TRRTYRLAKFRRSNQGTICINQKPIVDEGDRVESGQVIADGPCTDNGEMALGKNLLVAFMPWEGHNYEDA  
IILSQRLVQDDVLSSIHIEEHEVDARDTKLGPPEEITRDI PNVAEEVLADLDERGIIRIGAEVNPGDVLVGV  
VTPKGETELTPEERLLRAIFGEKAREVRDTSCLKVPHGESGKVIIGRVVFSREDGDELPPGVNELVRVYVAQ  
KRKITDGDKLAGRHGNGVIAKIMPQEDMPFLEDGTPVDVVLNPHGVPRRMNIGQILETHLGVAKTGWQ  
VDAGKEEWKERLRTIGADAANPGQNVATPVFDGAREEEITGLLDSTLPNRDGVQLIGASGKAKLFDGRTG  
EQYPYPVAVGYIYILKLLHLVDDKIHARSTGPYSMITQQPLGGKAQFGGQRFGEMEVWALEAYGAAYALQ  
ELLTIKSSDDVHGRVKVYEAIVKGENIPEPGIPESFKVLIKEMQSLCLNVEVLSSDGVQIEMRDTDEDVFR  
AAEELGIDLSRREPSVEEV

>gi|158317799|ref|YP\_001510307.1| rpoB gene product [Frankia sp. EAN1pec]

MAASRSASRISFAKIIIEPLEVDPDLLALQTQSFDWLIIGNDIWAERVQEAIIDADRNDVPIITSGLEEVFEEIS  
PIEDFSGSMSLSFRDHRFEPPKYSVEECKDKDMTYSAPLFTVAEFTNNTTGEIKSQTVFMGDFPLMTPKG  
TFVINGTERVVVSQVLRSPGVYFEKAIDKASDKDLFSCVKVIPSARGAWLEFEIDKRDTVGVRIIDRKRQSV  
TVLLKALGWDEARILERFGDFPSMRVTLEKDHTSSQDDALLDIYRKLRPGEPPPTRESAQTLLENLFFNPK  
RYDLAKVGRYKVNKKLTLVAHDVGVLTEDDVRTIEYIVKLHAGQDPDNYEVDDIDHFGNRRLRITVGEI  
IONQVRLGLARMERVVRRMTTQDVEAITPQTLINIRPVVASIKEFFGTSQLSQFMDQTNPLAGLTHKR  
LSALGPGGLSRERAGFEVRDVHPSHYGRMCPIETPEGPNIIGLIGSLSTFARVNPFGFVETPYRKVENGRV  
TGQIDYLTADEEDRHVKAQANTPLNADGTFADRVLRKKGGEVEFIPPDEVDYMDVSPRQMVSVATAMI  
PFLEHDDANRALMGSNMQRQSVPLLRSEAPLVGTGMEARAADKAGDVVCAQSGVVEDLSADYITVMHDD  
GTRRTYRLAKFRRSNQGTICINQKPIVFEGRVEAGQVIADGPCTDNGEMALGKNLLVAFMPWEGHNYEDA  
IILSQRLVQDDVLSSIHIEEHEVDARDTKLGPPEEITRDI PNVAEEVLADLDERGIIRIGAEVSPGDVLV  
KVTPKGETELTPEERLLRAIFGEKAREVRDTSCLKVPHGESGKVIIGRVVFSREDGDELPPGVNELVRVYVA  
QKRKITDGDKLAGRHGNGVIAKILPVEDMPFLPDGTAVDVVLNPHGVPRRMNIGQILETHLGVAKTGW  
QVDSGAEGWKERLRGIGADAAPPNTVATPVFDGAREEEITGLLDATLPNRDQGMIGSSGKAELYDGR  
GEPYPYPVAVGYIYILKLLHLVDDKIHARSTGPYSMITQQPLGGKAQFGGQRFGEMEVWALEAYGAAYAL  
QELLTIKSSDDVGRVKVYEAIVKGENIPEPGIPESFKVLIKEMQSLCLNVEVLSSDGVSIEMRDTDEDVFR  
RAAEELGIDLSRREPSVEEV

>gi|288917220|ref|ZP\_06411589.1| DNA-directed RNA polymerase, beta subunit [Frankia sp. EUN1f]  
MAASRSASRISFAKIIIEPLEVDPDLLALQTQSFDWLIIGNDAWAERVQESIDAGRDDVPITSGLEEVFEEIS  
PIEDFSGSMSLSFRDHRFEPPKYSVEECKDKDMTFSAPLFTAEFTNNTTGEIKSQTVFMGDFPLMTTKG  
TFVINGTERVVVSQVLRSPGVYFEKAIDKASDKDLFSCKIIPSRGAWLEFEIDKRDTVGVRIKRRQSV  
TVLLKALGWDEARILERFGFPPSMRVTLKEDHTSSQDDALLDIYRKLRPGEPTRESAQTLLENLFFNPK  
RYDLAKVGRYKVNKLELEVAYDVGVLTEDDVVRTIEYIVKLHAGQEPDTEVDDIDHFGNRRRLRTVGEL  
IQNQVRLGLARMERVVRRMTTQDVEAITPQTLINIRPVVASIKEFFGTSQLSQFMDQTNPLAGLTHKRR  
LSALGPGGLSRERAGFEVRDVHPSHYGRMCPIETPEGPNIIGLIGSLSTFARVNPFGFVETPYRKVENGRV  
TGQIDYLTADEEDRHVKAQANTPLNADGSFAEERVLVRRKGGEVEFIPPDEVDYMDVSPRQMVSATAMI  
PFLEHDDANRALMGSNMQRQSVPLLRSEAPLVGTGMEARAADKAGDVVCAQSGVVEDLSADYITVMHDD  
GTRRTYRLAKFRRSNQGTCINQKPIVFEGRVEAGQVIADGPCTDNGEMALGKNLLVAFMPWEGHNYEDA  
IILSQRVLVQDDVLSIIHIEEHEVDARDTKLGPEEITRDI PNVAEEVLADLDERGIIRIGAEVSPGDVLV  
KVTPKGETELTPEERLLRAIFGEKAREVRDTSKVPHGSGKVI GVRVFSREDGDELPPGVNELVRVYA  
QKRKITDGDKLAGRHGKNGVIAKILPVEDMPFLSDGTAVDVVLNPHGVPRRMNIGQILETHLGVVAKTGW  
QVDSGSEDWKERLRGIGADAAPPNTNATPVFDGAREEEITGLLDATLPNRDGTQLIGSSGKAELYDGR  
GEPYPYPVAVGYIYILKLLHLVDDKIHARSTGPYSMITQQPLGGKAQFGGQRFGEMEVALEAYGAAYAL  
QELLTIKSDDVGRVKVYEAIVKGENIPEPGIPESFKVLIKEMQSLCLNVEVLSDDGVSIEMRDTDEDV  
RAAEELGIDL SRREPSSVEEV

>gi|392944827|ref|ZP\_10310469.1| DNA-directed RNA polymerase, beta subunit [Frankia sp. QA3]  
MAASRSSSRISFAKIIIEPLEVDPDLLALQTQSFDWLIIGSDAWAERVQEAIDSGRDDVPITSGLEEVFEEIS  
PIEDFSGSMSLSFRDHRFEPPKYSVEECKDKDMTFSAPLFTAEFTNNTTGEIKSQTVFMGDFPLMTPKG  
TFVINGTERVVVSQVLRSPGVYFERSLKDASDKDLYSCKVIPSARGAWLEFEIDKRDTVGVRIKRRQSV  
TVLLKALGWDEARILERFGDYP SMRITLTKEDHTASQDDALLDIYRKLRPGEPTRESAQTLLENLFFNPK  
RYDLAKVGRYKVNKLTLEIAHDVGVLTEDDIVRTIEYVVKLHAGADPAEYEVDDIDHFGNRRRLRTVGEL  
IQNQVRLGLARMERVVRRMTTQDVEAITPQTLINIRPVVASIKEFFGTSQLSQFMDQTNPLAGLTHKRR  
LSALGPGGLSRERAGFEVRDVHPSHYGRMCPIETPEGPNIIGLIGSLSTFARVNPFGFVETPYRKVENGRV  
TDQIDYLTADEEDRHVKAQANTPLQPDGAFADRVLVRRKGGEVEFIPPDEVDYMDVSPRQMVSATAMI  
PFLEHDDANRALMGSNMQRQSVPLLRSEAPLVGTGMEARAADKAGDVVVCVQAGVVEDLSADYITVMHDD  
GTRRTYRLAKFRRSNQGTCINQKPIVFEGRVEAGQVIADGPCTDNGEMALGKNLLVAFMPWEGHNYEDA  
IILSQRVLVQDDVLSIIHIEEHEVDARDTKLGPEEITRDI PNVAEEVLADLDERGIIRIGAEVSPGDVLV  
KVTPKGETELTPEERLLRAIFGEKAREVRDTSKVPHGSGKVI GVRVFSREDGDELPPGVNELVRVYA  
QKRKITDGDKLAGRHGKNGVIAKILPAEDMPFLEDGTPVDIVLNPHGVPRRMNIGQILETHLGVVAKTGW  
QVDTGDEEWKERLRGIGADAAPAGTNVATPVFDGAREEEITGLLDSTLPNRDGVQLIGSSGKATLFDGR  
GEPYPYPVAVGYIYILKLLHLVDDKIHARSTGPYSMITQQPLGGKAQFGGQRFGEMEVALEAYGAAYAL  
QELLTIKSDDVGRVKVYEAIVKGENIPEPGIPESFKVLIKEMQSLCLNVEVLSDDGQVIEMRDTDEDV  
RAAEELGIDL SRREPSSVEEV

>gi|336179792|ref|YP\_004585167.1| unnamed protein product [Frankia symbiont of Datisca glomerata]  
MAASPTSSRISFAKIIIEPLEVDPDLLALQTQSFDWLIIGSDAWAERVQEAIDAGRDDVPVITSGLEEVFEEIS  
PIEDFSGSMSLSFRDHRFEPPKYSVEECKDKDMTYSAPMFVTAETNNTTGEIKSQTVFMGDFPLMTPKG  
TFVINGTERVVVSQVLRSPGVYFEKTIDKVS DKDLFSCKVIIPSRGAWLEFEVDKRDTVGVRIKRRQSV  
TVLLKALGWDEARILERFGDFP SMRVTLKEDHTSSQDDALLDIYRKLRPGEPTRESAQTLLENLFFNPK  
RYDLAKVGRYKVNKLEVDVPHDVGVLTEDDIVRTIEYVVQLHAGRDSSYDVDDIDHFGNRRRLRTV  
QNLVRLGLARMERVVRRMTTQDVEAITPQTLINIRPVVASIKEFFGTSQLSQFMDQTNPLAGLTHKRR  
LQNLVRLGLARMERVVRRMTTQDVEAITPQTLINIRPVVASIKEFFGTSQLSQFMDQTNPLAGLTHKRR  
SALGPGGLSRERAGFEVRDVHPSHYGRMCPIETPEGPNIIGLIGSLSTFARVNPFGFVETPYRKVVAGR  
VT DQIDYLTADEEDRHVIAQANAPLSSDGSFAEHRVLVRRKGGEVEFIPPDEVDYMDVSPRQMVSATAMI  
PFLEHDDANRALMGSNMQRQSVPLLRSEAPLVGTGMEARAADKAGDVVCAQAGVVEDLSADYITVMHDDG  
TRRTYRMAKFRRSNQGTCINQKPIVDEGRVEAGQVIADGPCTDNGEMALGKNLLVAFMPWEGHNYEDA  
IILSQRVLVQDDVLSIIHIEEHEVDARDTKLGPEEITRDI PNVAEEVLADLDERGIIRIGAEVSPGDVLV  
KVTPKGETELTPEERLLRAIFGEKAREVRDTSKVPHGSGKVI GVRVFSREDGDELPPGVNELVRVYA  
QKRKITDGDKLAGRHGKNGVIAKILPAEDMPFLSDGTPVDVVLNPHGVPRRMNIGQILETHLGVVAKTGW  
VDGGAEGWKERLRGIRADQAPPNTNATPVFDGAREEEITGLLASTLPNRDGVQLIGASGKAELFDGR  
TG EPYPYPVAVGYIYILKLLHLVDDKIHARSTGPYSMITQQPLGGKAQFGGQRFGEMEVALEAYGAAYAL  
QELLTIKSDDVGRVKVYEAIVKGENIPEPGIPESFKVLIKEMQSLCLNVEVLSDDGVSIEMRDTDEDV  
RAAEELGIDL SRREPSSVEEV

>gi|284992886|ref|YP\_003411440.1| DNA-directed RNA polymerase subunit beta [Geodermatophilus obscurus DSM 43160]  
MAGSRPTSINPRTTDSGPYQQSQAPQAGPRTGEADQKIPGAPLRVVSFAKISEPLEVDPDLLALQTASFD  
WLIGSPTWRATLSPEEQADAVGGLAEILEEISPIEDFSGSMSLSFSNPRFEDVKASLEECKDKDMTYAAP  
LFVTAEFMNNNTGEIKSQTVMFGDFPIMTNKGTFFVINGTERVVVSQLVRSFGVYFDKTLTKTSDKDVSA  
KVIPSRGAWLEFDVDRDVTGVRIDRKRQPVTVLLKALGWTEDRIREHFQWSPTVLATLEKDHIAGQDE  
ALLDIYRKLRPGEPTRESAQALLENLFFNGKRYDLAKVGRYKVNKKGVDVPQATLTLTEDDIVATIEY  
VVRLHAGEPDHGVDDIDHFGNRRRLRTVGELIQNQIRVGLSRMERVVRERMTTQDVEAITPQTLINIRPVV  
ASIKEFFGTSQLSQFMDQTNPLAGLTHKRRLSALGPGGLSRERAGMEVRDVHPSHYGRMCPIETPEGPNI  
GLIGLSAYGRVNAFGFIETPYRRVQNGVVTDTIDYLTADEEDRFVVAQANSPLDAQGRFAEDRVLVVRTK  
GGEVDYLVPEENVYMDVSPRQMTSVATAMIPFLEHDDANRALMGANMQRQAVPLLRSEAPLVGTGMELRA  
AVDAGDVVVAEKAGVVEDSTADYVTVMADDGTRQTYRLLKFRRSNQGTSINQTPVVDEGQRVEVGQVIAD  
GPCTDEGEMALGKNLLVAFMPWEGHNYEDAIILSQRVQDDVLSIIHIEFEVDARDTKLGAEIEITRDIP  
NVSEEVVLADLDERGIIRIGAEVVPGDILVGVKVTPKGETELTPEERLLRAIFGEKAREVRDTSKVKHGES  
GKVIQVRFVFSREDGDELPAVGNELIRVYVAQMRKISDGDKLAGRHGNGKVIKILPQEDMPFLEDGTPVD  
IVLNPLGVPGRMNVGQVLETHLGVVAKSGWQVEGTPAVNLPDAPARAAGPGTRTATPVFDGAREEEIVG  
LLGSTIPNRDGNRMVQPTGKARLFDGRSGEPFPEAISVGYVYILKLLHLVDDKIHARSTGPYSMITQQPL  
GGKAQFGGQRFGEWAMQAYGAAALQELLLTIKSDDILGRVKVYEAIVKGENIPEPGIPESFKVLLKE  
LQSLCLNVEVLSGDGQAIELRDTDEVFRAAEELGIDLSRREPSSVEDV

>gi|152964649|ref|YP\_001360433.1| DNA-directed RNA polymerase subunit beta [Kineococcus radiotolerans SRS30216]  
MEGPLLAASLPASAPNSTYIGNQSPRTVSGRYSFGKIHPEVDPDLLALQTDSFDWLLGNKRWQDRVEAS  
TNGGLAVPTTSGLEEIFEEISPIEDFSGSMSLSFRDHRFEPKYSLDDCKERDLTYSAPLVTAEFINGN  
TGEIKSQTVMFGDFPLMTDRGTFFVINGTERVVVSQLVRSFGIYFERVPDKTSDRDTWTAKIIPSRGAWLE  
FEIDKRDTVGVVRVDRKRKQSVTVLMKALGWSESIREEFADYESMISTLEKDHTSGVEDALLDIYRKLRP  
GEPPTQEAARNLLDNLYFNPKRYDLAKVGRYKVNKKGTEEPLSDSVLSVDDIVRTIKYLVKLHAGEVTM  
PGVKNQGPVDRVEVDDIDHFGNRRRLRSVGEIQNQVRTGLSRMERVVRERMTTQDVEAITPQTLINIRP  
VVASIKEFFGTSQLSQFMDQTNPLAGLTHKRRLSALGPGGLSRERAGMEVRDVHPSHYGRMCPIETPEGP  
NIGLIGLSSYGRINPFGLIETPYRKIVDGVVSEVEYLTADEEDAFVIAQANAPLDADSRFAEARVLR  
AKGGETEFPVPRDEVYMDVAARQMVSVATAMIPFLEHDDANRALMGANMQRQAVPLVKSEAPLIGTGMF  
RAAVDAGDVVVAATKAGVATDVSAADMITTNDGTSTTYKVAKFRSNHGTAYNQVINEGDRVEVGTVL  
ADGPSTDGGEMALGRNLMVAFMPWEGHNYEDAIILSQRVQDDVLSIIHIEEHEVDARDTKLGPEEITRD  
IPNVAEEVLADLDERGIIRIGAEVRDGDLLVGVKVTPKGETELTPEERLLRAIFGEKAREVRDTSKVP  
ETGTVIGVKVFDREDEGDELPPGVNQLVRVYVANKRKITDGDKLAGRHGNGKVISKILPVEDMPFLEDGTP  
VDVILNPLGVPGRMNVGQVLEHLHLGWIASRGWKIEGQPDWAKLIPEEIREAPAGSRIATPVFDGAREEEI  
TGLLSSTIPTRDGRDLVGGDGKARLFDGRSGEPFDPVAVGYMYILKLHHLVDDKIHARSTGPYSMITQQ  
PLGGKAQFGGQRFGEWVALEAYGAAALQELLLTIKSDDVLGRVKVYEAIVKGENIPEPGIPESFKVLI  
KEMQSLCLNVEVLSGDGMAIEMRSDDEDVFRAAEELGIDLARREPSSVEEV

>gi|357390126|ref|YP\_004904966.1| rpoB gene product [Kitasatospora setae KM-6054]  
MAAPRNASNSASTAPLRVVSFAKIKEPLEVNPALLALQTESFDWLLGNAAWKSRVEAALESQDVPKSGL  
EEIFEEISPIEDFSGSMSLTFRDHRFEPKNSIDECKDRDFTFAAPLVTAEFNTNETGEIKSQTVMFGD  
FPLMTNKGTFFIINGTERVVVSQLVRSFGVYFDSTLDKVSDDKIFSAKIIPSRGAWLEMEIDKRDMVGVRI  
DRKRKQSVTVLLKALGWTTMILEEFGEYESMRATLEKDHTQGQDDALLDIYRKLRPGEPTREAAQTL  
ENLYFNPKRYDLAKVGRYKVNKKGNAESLDSGVLTEPDIINTIKYLVKLHAGETEWDRDDEGRDIVIEVD  
DIDHFGNRRRLRNVGELIQNQVRTGLARMERVVRERMTTQDVEAITPQTLINIRPVVASIKEFFGTSQLSQ  
FMDQTNPLSGLTHKRRLSALGPGGLSRERAGFEVRDVHPSHYGRMCPIETPEGPNIIGLIGSLASYGRVNA  
FGFIETPYRKVVVDGVVTEVDYLTADEEDRYVIAQANAPLTAELTFAEPRVLRVRRRGGGEIDYIPGTEIDY  
MDVSPRQMVSVATAMIPFLEHDDANRALMGSNMMRQAVPLLRSEAPLVGTGMEYRCAVDAADVITADKAG  
VVQEVASDYVTVANDDGTYNTYRAAKFTRSNQGTAFNQKVLVDEGQRVEVNQVLADGPCTDEGEMALGKN  
LLVAFMSWEGHNYEDAIILSQRVQDDVLSIIHIEEHEVDARDTKLGPEEITRDIPNVSEEVVLADLDERG  
IIRIGADVVTGDILVGVKVTPKGETELTPEERLLRAIFGEKAREVRDTSKVPKHGESGKVIQVRFVDR  
DELPPGVNQLVRVYVAQKRKITNGDKLAGRHGNGKVISKILPVEDMPFLEDGTPVDIILNPLGVPGRMNP  
GQVLEIHLGWLAMQGWVSGLADEWAQRLQAIAGADTVEGGTNLATPVFDGAREDEITGLLDNTTLTRDGE  
RLVNSTGKARLFDGRSGEPFMPVSVGYMYILKLHHLVDDKIHARSTGPYSMITQQPLGGKAQFGGQRF  
EMEVVALEAYGAAALQELLLTIKSDDVLGRVKVYEAIVKGENIPEPGIPESFKVLIKEMQSLCLNVEVLS  
SDGQSIEMRSDDEDVFRAAEELGIDLSRREPSSVEEV

>lcl|KUTG\_05840T0 | KUTG\_05840 | Kutzneria sp. 744 DNA-directed RNA polymerase subunit beta (1165 aa)  
MEGRILAVSRATKATAATNSTGIPGAPRRVSFAKIREPLAAPNLELQTHSFEWLTGNEAWFQRRVDAGDE  
APTGGLEEVLINEISPIEDFSGSMSLSFSDFRPFDEVKASVEDCKDKDMTYAAPLFVTAEFNTHTTGEIKSQT  
VFMGDFPMMTDKGTFIINGTERVVVSQLVRSFGVYDITAIDKTTDKDVFNVKIIPSRGAWLEFDVDRDRTV  
GVRIDRKRQRQPVTVLLKALGWTTTEQIRERFHFSETLLATLEKDHTAGPDEALLDIYRKLRLPGEPPTKESAQ  
ALLENLFFKEKRYDLAKVGRYKVNKKLGLGFPVSTGVLTEDDIVTTIEYLVRLHAGDTEMTAGDTPVPEV  
DDIDHFGNRRRLRTVGELIQNQIRVGLSRMERVVRRMRTTQDVEAITPQTLINIRPVVAAIKEFFGTSQLSQ  
FMDQTNPLAGLTHKRRLSALGPGGISRERASMDVRDVHPSHYGRMCPIETPEGPNIIGLIGLSSSFARVNP  
GFIESPYRKVVVDGRVTDQIDYLTADEEDRYVKAQANTLVDDDEGNFLEDRVMVRRKGGGETDLADTADVDYMD  
VSPRQMVSVATAMVPFLEHDDANRALMGANMQRQAVPLLRSESPVGTGMELRAAVDAGDVVIAKSGVVE  
ELSADFITVMADDGSRQTYAMHKFRSNQGTICINQKPIVNEGDRVEHGQVIADGPCTQNGEMALGKNLLVA  
IMPWEHNYEDAIILSQRLVQDDVLTSIHIEEHEIDARDTKLGAEETRDI PNVSEEV LADLDERGIIRIG  
AEVRDGDILVGVKTPKGETELTPEERLLRAIFGEKAREVRDTSKLVPHGETGKVI GIRVFSREDDDELPPG  
VNELVRVYVAQKRRIQDGDKLAGRHGNKGVIGKILPVEDMPFMPDGTVPDIVLNTHGVP RRMNIGQVLETH  
LGWIAKQGWSIDGPEWASKMPEELYEVPNTNTATPVFDGAREEEIIGLLGSTTPNRDGERMVGQNGKAT  
LLDGRSGEPYPFPVAVGYMYILKLLHLVDDKI HARSTGPYSMITQQPLGGKAQFGGQRF GEMECWAMQAYG  
AAYTLQELLTIKSDDKLGRVKVYEAIVKQNVPEPGVPESFKVLLKELQSLCLNVEVLSSDGA A IEMRDGD  
DEDLRAAANLGINLSRNEPSVDDVNV

>gi|302869981|ref|YP\_003838618.1| DNA-directed RNA polymerase subunit beta [Micromonospora aurantiaca ATCC 27029]  
MAASRPAKTSRTSSAFAPRRVSFGRITEHLEVPNLLAIQNESFDWLVGNEAWQGRSADDPHARSGLAEILD  
EISPIEDFSGTMSLSFSAPRFDEVKASIEECKEKDLTYCAPLFVTAEFNTNTTGEIKSQT VFMGDFPMMTP  
KGTFIINGTERVVVSQLVRSFGVYFDKQDPKTS DRDLSSVKVIPSRGAWLEFDIDKRDTVGVRIDRKRQA  
VTVLLKAI GWSAERIREKFGWSELMMTTLEKDHIAGQDEALLDIYRKLRLPGEPP TRENAQTLLDNLFFNPK  
RYDVAKVGRYKFNKLELDVPI TTGTLTEDDIVATVEYLCRLHAGEEGYEADDIDHFGNRRRLRTVGELIQN  
QVRVGLSRMERVVRRMRTTQDVEAITPQTLINIRPVVAAIKEFFGTSQLSQFMDQTNPLAGLTHRRRLSAL  
GPGGLSRERAGFEVRDVHPSHYGRMCPIETPEGPNIIGLIGALSTFARVNPFGF IETPYRKVIDGRVTDQID  
YLTADEEDRFVKAQANAPLKS DGTFAEDRVLVRRKGGGETEDVAPGAVDYMDVSPRQMTSVATAMIPFLEHD  
DANRALMGANMQRQAVPLVKA EAPLVGTGMEYRAAVDAGDVVVAE VGGVVEDLCADYITVHQDDGHRRTYL  
LHKFRSNAGSCVNQKPVVFE GDRVEAGQVIADGPCTDEGEMALGRNLLVAFMCWEGHNYEDAIILSQRLV  
QQDVLTSIHIEEHEVDARDTKLGPEEITRDI PNVSEEMLADLDERGIIRIGAEVVPGDILVGVKTPKGETE  
LTPEERLLRAIFGEKAREVRDTSKLVPHGETGTVIGVRTFSREDGDELPPGVNELVRVYVAQKRRIQDGDK  
LAGRHGNKGVISKILPIEDMPFLEDGTPVDIVLNPLGVPSRMNIGQVLETHLGWVAKTGWSVDGDDAEWKR  
QLRSINAHSEPD TNVATPVFDGAREEEISGLLASTLPNRDGNQLIGGSGKAQLFDGRSGEPLPDP IAVGY  
VYILKLNHLVDDKI HARSTGPYSMITQQPLGGKAQFGGQRF GEMECWAMQAYGAAYALQELLTIKSDDLG  
RVKVYEAIVKGENIPEPGIPESFKVLLKELQSLCLNVEVLSSDGVALEMRET DDEVFRAAEELGIDLSRRE  
PSSVEEV

>gi|443294185|ref|ZP\_21033279.1| DNA-directed RNA polymerase subunit beta [Micromonospora lupini str. Lupac 08]  
MAASRPAKTSRTSSAFAPRRVSFGRITEHLEVPNLLAIQNESFDWLVGNEAWQGRSADDPHARSGLAEIL  
EISPIEDFSGTMSLSFSAPRFDEVKASIEECKEKDLTYCAPLFVTAEFNTNTTGEIKSQT VFMGDFPMM  
TPKGT FVINGTERVVVSQLVRSFGVYFDKQDPKTS DRDLSSVKVIPSRGAWLEFDIDKRDTVGVRIDRKR  
RQAVTVLLKAI GWSAERIREKFGWSELMMTTLEKDHIAGADEALLDIYRKLRLPGEPP TRENAQTLLDNLF  
FNP KRYDVAKVGRYKFNKLELDVPI TTGTLTEDDIVATVEYLCRLHAGEDGYEADDIDHFGNRRRLRTVG  
ELIQNQVRVGLSRMERVVRRMRTTQDVEAITPQTLINIRPVVAAIKEFFGTSQLSQFMDQTNPLAGLTHR  
RRLSALGPGGLSRERAGFEVRDVHPSHYGRMCPIETPEGPNIIGLIGALSTFARVNPFGF IETPYRKVVEG  
RVTDQIDYLTADEEDRFVKAQANARLKADGTFAEERVL CRRKGGGETEDVVP GAVDYMDVSPRQMTSVATA  
MIPFLEHDDANRALMGANMQRQAVPLVKA EAPLVGTGMEYRAAVDAGDVVVAE VGGVIEDLCADYVTIHQ  
DDGHRRTYLLHKFRSNAGSCVNQKPVVFE GDRVEAGQVIADGPCTDEGEMALGRNLLVAFMCWEGHNYE  
DAIILSQRLVQDDVLTSIHIEEHEVDARDTKLGPEEITRDI PNVSEEMLADLDERGIIRIGAEVVPGDIL  
VGVKTPKGETELTPEERLLRAIFGEKAREVRDTSKLVPHGETGTVIGVRTFSREDGDELPPGVNELVRVY  
VAQKRRIQDGDKLAGRHGNKGVISKILPIEDMPFLEDGTPVDIVLNPLGVPSRMNIGQVLETHLGWVAKT  
GWKVEGDDTDWKRQLRS IDAHSEGD TNVATPVFDGAREEEISGLLESTLPNRD GKQLIGRTGKAQLFDG  
RSGEPLPDP IAVGYVYILKLNHLVDDKI HARSTGPYSMITQQPLGGKAQFGGQRF GEMECWAMQAYGAAY  
ALQELLTIKSDDLGRVKVYEAIVKGENIPEPGIPESFKVLLKELQSLCLNVEVLSSDGVALEMRET DDE  
VFRAAEELGIDLSRREPSSVEEV

>gi|315501442|ref|YP\_004080329.1| DNA-directed RNA polymerase subunit beta [Micromonospora sp. L5]  
MAASRPAKTSRTSSAFAPRRVSFGRITEHLEVPNLLAIQNESFDWLVGNEAWQGRSADDPHARSGLAIEIL  
DEISPIEDFSGTMSLSFSAPRFDEVKASIEECKEKDLTYCAPLFVTAEFNTNTTGEIKSQTVFMGDFPMM  
TPKGTFIINGTERVVVSQLVRSFVYFDKQPKTSDRDLSSVKVIPSARGAWLEFDIDKRDTVGVRIKRR  
RQAVTVLLKAIKWSAERIREKFGWSELMMTTLEKDHIAGQDEALLDIYRKLKRPGEPPPTRENAQTLLDNLF  
FNPKRYDVAKVGRYKFNKKLELDVPIITGTLTEDDIVATVEYLCRLHAGEEGYEADDIDHFGNRRRLRTVG  
ELIQNQVRVGLSRMERVVRRMTTQDVEAITPQTLINIRPVVAAIKEFFGTSQLSQFMDQTNPLAGLTHR  
RRLSALGPGGLSRERAGFEVRDVHPSHYGRMCPIETPEGPNIIGLIGALSTFARVNPFGFIEETPYRKVIDG  
RVTQDIDYLTAEEDRFVKAQANAPLKSDGTFADRVLRVRRKGGETEDVAPGAVDYMDVSPRQMTSVATA  
MIPFLEHDDANRALMGANMQRQAVPLVKAESPLVGTGMEYRAAVDAGDVVVAEVEGGVVEDLCADYITVHQ  
DDGHRRTYLLHKFRRSNAGSCVNQKPVVFEGRVEAGQVIADGPCTDEGEMALGRNLLVAFMCWEGHNYE  
DAIILSQRLVQQDVLTSIHIEEHEVDARDTKLGPEEITRDI PNVSEEMLADLDERGIIRIGAEVVPDIL  
VGKVT PKGETELTPEERLLRAIFGEKAREVRDTSKLVPHGETGTVIGVRTFSREDGDELPPGVNELVRVY  
VAQKRKI QDGDKLAGRHGNKGVISKILPIEDMPFLEDGTPVDIVLNPLGVPSRMNIGQVLETHLGWVAKT  
GWSVDGDDAEWKRQLRSINAHSEPDNTVATPVFDGAREEEISGLLASTL PNRDGNQLIGGSGKAQLFDG  
RSGEPLPDP IAVGYVYILKLNHLVDDKIHARSTGPYSMITQQPLGGKAQFGGQRFGECEWAMQAYGAAY  
ALQELLTIKSDDVLGRVKVYEAIVKGENIPEPGIPESFKVLLKELQSLCLNVEVLSDDGVALEMRET DDE  
VFRAAEELGIDLSRREPSSVEEV

>gi|238061130|ref|ZP\_04605839.1| DNA-directed RNA polymerase, beta subunit [Micromonospora sp. ATCC 39149]  
MAASRPAKTSRTSSAFAPRRVSFGRITEHLEVPNLLAIQNESFDWLVGNEAWQGRSADDPHARSGLAIEIL  
DEISPIEDFSGTMSLSFSAPRFDEVKASIEECKEKDLTYCAPLFVTAEFNTNTTGEIKSQTVFMGDFPMM  
TPKGTFIINGTERVVVSQLVRSFVYFDKQPKTSDRDLSSVKVIPSARGAWLEFDIDKRDTVGVRIKRR  
RQAVTVLLKAIKWSAERIREKFGWSELMMTTLEKDHIAGQDEALLDIYRKLKRPGEPPPTRENAQTLLDNLF  
FNPKRYDVAKVGRYKFNKKLELSVPIITGTLTEDDIVATVEYLCRLHAGEDGYEADDIDHFGNRRRLRTVG  
ELIQNQVRVGLSRMERVVRRMTTQDVEAITPQTLINIRPVVAAIKEFFGTSQLSQFMDQTNPLAGLTHR  
RRLSALGPGGLSRERAGFEVRDVHPSHYGRMCPIETPEGPNIIGLIGALSTFARVNPFGFIEETPYRKVVDG  
RVTQDIDYLTAEEDRFVKAQANAPLKADGTFVEDRVLRVRRKGGETEDVAPGAVDYMDVSPRQMTSVATA  
MIPFLEHDDANRALMGANMQRQAVPLVKAESPLVGTGMEYRAAVDAGDVVVAEVEGGVIEDLCADYITIHQ  
DDGHRRTYLLHKFRRSNAGSCVNQKPVVFEGRVEAGQVIADGPCTDEGEMALGRNLLVAFMCWEGHNYE  
DAIILSQRLVQQDVLTSIHIEEHEVDARDTKLGPEEITRDI PNVSEEMLADLDERGIIRIGAEVVPDIL  
VGKVT PKGETELTPEERLLRAIFGEKAREVRDTSKLVPHGETGTVIGVRTFSREDGDELPPGVNELVRVY  
VAQKRKI QDGDKLAGRHGNKGVISKILPIEDMPFLEDGTPVDIVLNPLGVPSRMNIGQVLETHLGWVAKT  
GWSVDGDDAEWKRQLRSIEAHSEPDNTVATPVFDGAREEEISGLLASTL PNRDGNQLIGGSGKAQLFDG  
RSGEPLPDP IAVGYIYILKLNHLVDDKIHARSTGPYSMITQQPLGGKAQFGGQRFGECEWAMQAYGAAY  
ALQELLTIKSDDVLGRVKVYEAIVKGENIPEPGIPESFKVLLKELQSLCLNVEVLSDDGVALEMRET DDE  
VFRAAEELGIDLSRREPSSVEEV

>gi|389866528|ref|YP\_006368769.1| DNA-directed RNA polymerase subunit beta [Modestobacter marinus]  
MAGSRPTSTTTTDSSTTPVDVQPGPRTGGTDQOKIPGAPLRVSFAKIREPLEVPDLLALQTASFIDLVGS  
PQWKATLAPPEEQADAVGGLAEILEEISPIEDFSGMSLSFSNPRFEDVKASLEECKDKDMTYAAPLFVTA  
EFMNNTTGEIKSQTVFMGDFPIMTSKGT FVINGTERVVVSQLVRSFVYFDKTLDKTSDKDVYSKAVIPS  
RGAWLEFDVDKRDTVGVRIKRRRQPVSVLLKALGWTE DRIREHFQWSPTMLATLEKDHIAGQDEALLDI  
YRKLKRPGEPPPTRESAQALLENLFFNPKRYDLAKVGRYKVNKKLGVEVPQGTSTLTEDDIVATIEYVRLH  
AGEPEHGVDDIDHFGNRRRLRTVGELIQNQIRVGLSRMERVVRRMTTQDVEAITPQTLINIRPVVASIKE  
FFGTSQLSQFMDQTNPLAGLTHKRRLSALGPGGLSRERAGMEVRDVHPSHYGRMCPIETPEGPNIIGLIGS  
LSSFGRVNPFGFIEETPYRKVENGVTDQIDYLTAEEDRFVVAQANSPLDAQQRLAEERVLVRTKGGVEVD  
YLAPENVDYMDVSPRQMTSVATAMIPFLEHDDANRALMGANMQRQAVPLLRSEAPLVGTGMEVLRRAVDAG  
DVVVAEKAGVVEDSTADYVTVMADDGTRQTYRLLKFRSNQGT SINQSPVVQEGORVEVGVQVIADGPCTD  
EGEMALGKNLLVAFMPWEGHNYEDA ILSQRLVQDDVLSIHI EEFVVDARDTKLGAEETRDI PNVSEE  
VLADLDERGIIRIGAEVVPDILVGKVT PKGETELTPEERLLRAIFGEKAREVRDTSKLVKHGESGKVI  
VRVFSREDGDELPAVNELIRVYVAQMRKISDGDKLAGRHGNKGVISKILPQEDMPFLEDGTPVDIVLNPL  
LGVPGRMNVGQVLETHLGIWIAKQGEVEGTPEWAAKLPGAARQAAPGTRTATPVFDGAKED E IIGLLGST  
IPNRDGNRMVKTETGKARLFDGRSGEPFPEPISVGYVYILKLNHLVDDKIHARSTGPYSMITQQPLGGKAQ  
FGGQRFGECEWAMQAYGAAYALQELLTIKSDDILGRVKVYEAIVKGENIPEPGIPESFKVLLKELQSLC  
LNVEVLSDDGQAI ELRDT DDEVFRAAEELGIDLSRREPSSVEDV

>gi|258651304|ref|YP\_003200460.1| DNA-directed RNA polymerase subunit beta [Nakamurella multipartita DSM 44233]  
MAVTSTSRSTASSPNRVSFALKREPLEVFNLLALQTDSEFAWLVGGADWRARQDEPTPSGLDEILEEISPI  
EDFSGNLSLSFSDFRFEVDEKANEEDCRDKDMTYSAPLFTVAEFMNGETGEIKSQTVMFGDFPMMTSKGTF  
IINGTERVVVSQVLRSPGVYFDKSLDKTAGKDFVSCKVIIPSRGAWLEFDVDRDTIGVRIKRRQPVSV  
LLKALGWDTERIREHFSWSPVLLATLEKDHIAGQDEALLDIYRKLPRGEPPTKESAQALLDNLFKDKRY  
DLAKVGRYKMNKLGVNQPTSVGTLTEDDLLSIVEYLLRLHQGDAEWTKNGRVYPVETDDIDHFGNRRRLR  
TVGELIQNQIRVGLSRMERVVRRMTTQDVEAITPQTLINIRPVVASIKEFFGTSQLSQFMDQTNPLAGL  
THKRRLSALGPGGLSRDRASLEVRDVHPSHYGRMCPIETPEGPNIIGLIGSLSTFARVNPFGFIEPTYRKV  
IDGVATDQIEYLTADEEDRFIIAQASAKLDNDGRFTENRVLVRRKGSGEVDQVPPAEVEYMDVSPRQTVS  
VATAMIPFLEHDEANRALMGANMQRQSVPLLRSEAPLVGTGMEARAADAGDVLIAEKSGVVEEATADYI  
SVMNDDGTHRTYRLNKFRSNQGT SFNQKPIVDEGARVEAGDVIADGPCTDGGEMALGKNLLVAFMPWEG  
HNYEDAIILSQRLVQDDVLTSLIHEEHEIDARDTKLGPEEITRDI PNVSEEV LADLDERGIVRVGAEVQD  
GDILVGVKTPKGETELTPEERLLRAIFGEKAREVRDTSKLVPHGETGKVIIGIRVFNRRDDGAE LPPGVNE  
LVRVYVAQQRKIQDGDKLAGRHGKGVIGKILPVEDMFPFLPDGTPVDIVLNPHGVPRRMNIGQILETHLG  
WVASQGWQVEGEPGWAKNLSEQTREAGPWTKTATPVFSGASEDEIMGLLGSTTPTRDGERLVHTDGKATL  
FDGRTGEPFPYPVAVGYMYI IKLLHLVDDKIHARSTGPYSMITQQPLGGKAQFGGQRFGE MECWAMQAYG  
AAYTLQELLTIKSDDIVGRVKVYEAIVKGENIPEPGIPESFKVLLKELQALCLNVEVLS SDGVAIEMRDS  
DDDLERAAAANLGINLSRNESASVDDLVN

>gi|326333393|ref|ZP\_08199639.1| DNA-directed RNA polymerase, beta subunit [Nocardiodiaceae bacterium Broad-1]  
MAARTSSGDSTPRRISFAKISEPLELPQLLALQTESFDWLIGNERWQEQVAAREAAAGEDVSHKSGLQEIF  
EEISPIEDFSETMSLSFESPVFYDPKYTVEECKEKDFTYSAPLYVSAEFTNNDTGEIKGQTVFMGDFPLM  
TDQGT FVINGTERVVVSQVLRSPGVYFERTADKTSKDIYAKLIPSRGAWLEFEIDKRDLVGVRLDRKR  
KQNVTVLLKALGWTNEQIREEFGEYESMMLTLEKDSTTAQDDALLDIYRKLPRGEPPTREAAQTLLNNYY  
FNPKRYDTAKVGRYKVNKGLTEAFDQQLTVDDIVATIKYVVALHDGRTQLETPQGTIDIAADDIDHF  
GNRRMRTV GELIQNQLRTGLARMERVVRRMTTQDVEAITPQSLINIRPVVAALKEFFGTSQLSQFMDQN  
NPLAGLTHKRRLSALGPGGLSRDRAGMEVRDVHPSHYGRMCPIETPEGPNIIGLIGSLASFGRINPFGFVE  
TPYRKVVNGVVDQIDYLTADDEDKYVIAQANA AVDENMKFATERVLVRQRDGEVSELLADEVDYIDVSP  
RQMVSVATALIPFLEHDDANRALMGANMQRQAVPLVRSDSPLVGTGIEYRAAVDAGDVLVAKKAGVVKV  
SADV IETLNDGTYYTYKLAKFERSNQNCVNQQPLVDEGARVEVGSPLADGPATQGAEMALGANLLVAF  
QSWQGHNYEDAIILSQRLVQDDYLTSLIHEEHEVDARDTKLGPEEITRDI PNVSEEM LADLDERGIIRIG  
AEVTTGDILVGVKTPKGETELTPEERLLRAIFGEKAREVRDTSMKVPHGEEGTVIGVRVFDREEGDELPP  
GVNQLVRVYVAQQRKISVGDKLAGRHGKGVIAKILPVEDMFPFMEDGTPVDVLLNPLGVPRRMNIGQVLE  
LHLGWLAKQGWDLNLSDDPDDSAWKQRLIKIHADKADPGTKVATPVFDGAREDEITGLLASTLPNRDQQR  
VVGTDGKARLFDGRSGEPFPEPVAVGYMYI IKLLHLVDDKIHARSTGPYSMITQQPLGGKAQFGGQRFGE  
MEVWAMEAYGAAYALQELLTIKSDDVPGRVKVYEAIVKGENIPDSGIPESFKVLVKEMQSLCLNVEVLSQ  
DGS AIELRDAEEDVFRAAEELGIDLSRREPSSVEEV

>gi|402802503|gb|AFR09913.1| DNA-directed RNA polymerase, beta subunit [Nocardiosis alba ATCC BAA-2165]  
MQTESFDWLLGNDTWKTRVETARNAGRKDVPEQSGLEEIFEEISPIEDFSGTMSLSFRDHRFEPKYS  
ECKDKDMTFSAPMFVTAEFINNDTGEIKSQTVMFGDFPLMTAKGTFIINGTERVVVSQVLRSPGVYFDKS  
VDKTSKDLFGCKVIPSRGAWLEFEVDKRDVGVRIKRRKQGVTVLLKALGWTDDQILERFGQYESIRN  
TLEKDPTAGTDDALLDIYRKLPRGEPPTKESAQALLENLYFNPKRYDLAKVGRYKINKKLG LDTDYTQGT  
LTEEDIVATIDYLVRLHAGEVEKETVFLRPIETDDIDHFGNRRRLRTV GELIQNQVRLGLARMERVRER  
MTTQDVEAITPQTLINIRPVVASIKEFFGTSQLSQFMDQTNPLAGLTHKRRLSALGPGGLSRERAGFEVR  
DVHPSHYGRMCPIETPEGPNIIGLIGSLAAYGRVNSFGFVETPYRKVIDGRISEQIDYLTADDEDLYVIAQ  
ANTPLNADGSAEAGVGLVRRKGGFEQVDTSEVDYMDVSPRQMVSVATAMIPFLEHDDANRALMGANMQR  
QAVPLLRABEAPFVGTGMEYRAATDAGEVILAEKAGVVEDVTADYVTVMADDGTRKTYRMGKFQRSNQGTC  
FNQRPVHTEGQRVEVKQVLADGPSTDQGEMLGKNLLVAYMSWEGHNYEDAIILSQRLVQDDVLSIHE  
EHEVDARDTKLGPEEITREIPNVSEEV LADLDRGIIRIGAEVVDGDIILVGVKTPKGETELTPEERLLRA  
IFGEKAREVRDTSKLVPHGETGKVIIGVRVFSREEGDELAPGVNEMVRVYVAQQRKITDGDKLAGRHGK  
VIAKILPQEDMFPLEDGTPVDIILNPLGVPGRMNVGQVLEVHLGWLAKNGWVVEGAE EEWQKSLHAIGAS  
DVEPNRSRVATPVFDGLHGDEL SGLIKSVRPNKDG NR LINDDGKARLFDGRTGEPFAEPI SVGYKYIILKLH  
HLVDDKIHARSTGPYSMITQQPLGGKAQFGGQRFGE MEVWALEAYGAAYALQELLTIKSDDVPGRVKVY  
EAIVKGENIPEPGIPESFKVLIKEMQSLCLNVEVLS SDGMSIEMRDSDEDVFRAAEELGIDLGRREPSSVE  
EV

>gi|297564030|ref|YP\_003683003.1| DNA-directed RNA polymerase subunit beta [Nocardiopsis dassonvillei subsp. dassonvillei DSM 43111]  
MAASRNASANALGPHRVSFARIQEPLLEVPNLLALQTESFDWLLGNDRWKTRVETARNAGRKDVPEQSGLE  
EIFEEISPIEDFSGTMSLSFRDHRFEPKYSSEDECKDRDMTYSAPMFVTAEFINNDTGEIKSQTVFMGDF  
PLMTETGTFIINGTERVVVSQLVRSFGVYFDKSVDKTSDKDLYGCKVIPSARGAWLEFEVDKRDVGVRI  
RKRKQGVTVLLKALGWTTDQILERFGQYESIRNTLEKDPTAGTDDALLDIYRKLRLPGEPPPTKESQA  
LLE NLYFNPKRYDLAKVGRYKINKKLGLDTDYRQGTLEEDIVATIDYLVRLHAGETEKETVNGPRPI  
ETDDI DHFGNRRRLRTVGELIQNQVRLGLARMERVVRRMTTQDVEAITPQTLINIRPVVASIKEFFGTS  
QLSQFM GQTNPLEGLTHKRRLSALGPGGLSRERAGFEVRDVHPSHYGRMCPIETPEGPNI  
GLIGSLAAYGRVNSFG FVETPYRRIIDGKVSQVDYLTADEEDLHVIAQANTPMNPDGSFAEAGV  
LVRKGGFEFEQVSTDEVDYMD VSPRQMVSVATAMIPFLEHDDANRALMGSNMQRQAVPL  
LMAESPFGVTGMEYRAATDAGEVVLAKAGVV EDVTADYVTVMADDGTRKTYRMGK  
FQRSNQGTFCFNQRP IVAEGQ RVEERQVLADGPSTDQGEMSLGKNLL VAYMSWEGHNY  
EDAI ILSQRLVQDDVLS IHIIEHEVDARDTKLGPEEITREIPNVSEEVLADLDRGII  
RIGAEVVDGDILVGKVT PKGETELTPEERLLRAIFGEKAREVRDTSKLVPHGETGKVIGV  
RVFSREDGDE LAPGVNEMVRVYVAQKRKITDGDKLAGRHGNKGVISKILPQEDMPFLEDGTP  
VDI IILNPLGVPGRMNVGQ VLEVHLGWLAKNGWLVEGVVEEWQKSLEAIGATDVP  
PDSRVATPVFDGLRGDELSGLIKSVRPNADGNRL INEDGKARLFDGRTGEPFAEPI  
SVGYKIILKLHHLVDDKI HARSTGPYSMITQQPLGGKAQFGGQRF GEM EVWALEAY  
GAAYALQELLTIKSDDVGRVKVYEAIVKGENIPEPGIPESFKVLIKEMQSLCLNVEV  
LSSD GMSIEMRDSDEDVFRAAEELGIDLGRREPSSVEEV

>gi|119714958|ref|YP\_921923.1| rpoB gene product [Nocardioides sp. JS614]

MQIEERIVEGHLLAARTTPGNTRRISFAKITEPLEVPQLLSLQTDSEFDWLVGNKWNAAVERRRSEGEDV  
SSKSGLQEIFEEISPIEDFSETMSLSFENPVFYDPKYTVDECKEKFDTYSAPLYVSAEFTNNDTGEIKGQ  
TVFMGDFPLMTDKGTFIINGTERVVVSQLVRSFGVYFERTADKTSKDIIYAKLIPSRGAWLEFEIDKRD  
MVGVRDLDRKRKQNVTVLLKALGWTTNEQIREEFGEYESMMLTLEKDHTQGGDDALLDIYRKLRLP  
GEPPTRE AAQTLNLYFNPKRYDLAKVGRYKINKKLGLEAFDQQTTLTIDDVAAIKYIVALHDG  
REQIEAPQGTLDISADDIDHFGNRRMRTVGELIQNQRLRTGLARMERVVRRMTTQDVEAITPQSL  
INIRPVVAALKEFFGT SLSQFMQDQTNPIAGLTHKRRLSALGPGGLSRDRAGMEVRDVHPSHYGR  
MCPIETPEGPNI GLIGSLASY GRINPFGFVETPYRKVTKGKVTQIDYLTADDEDRYVIAQANA  
ALDDKSRFVEERVLVRQRDGEVSEVLA DEVDYMDVSPRQMVSVATALIPFLEHDDANRALM  
GANMQRQAVPLIKSDSPLVGTGIEYRAAVDAGDVV ATAAGVVKEVSADVIETMNDGTYSTYR  
LAKFKRSNQGTFCINQRPLVSEGDRLEIGTP IADGPCTDEAEM ALGTNLLVAFMPWQGHNY  
EDAI ILSQRLVQEDILTSIHIIEHEVDARDTKLGPEEITRDIPNVSEEMLAD LDERGIIRIG  
AEVTTGDVVLVGKVT PKGETELTPEERLLRAIFGEKAREVRDTSMKVPHGESGTVIGVRF  
DREDGDELPPGVNQLVRVYVAQKRKISVGDKLAGRHGNKGVIAKILPIEDMPFMEDGTPVDV  
LNLPLGVP RRMNIGQILEHLGLWAKQGWDLNLDKSGADWKQRLIKIHADKAEPGTKVATPVFDG  
AREDEITGLLG STIPNRDGVRMIDNTGKASLFDGRSGEPFPEPVAVGYMYILKLHHLVDDKI  
HARSTGPYSMITQQPLGGK AQFGGQRF GEMEVWAMEAYGAAYALQELLTIKSDDVGRVKVY  
EAIVKGENIPDSGIPESFKVLVKEMQS LCLNVEVLSQDGTAIMRDAEEDVFRAAEELGIDL  
SRREPSSVEEV

>gi|331699183|ref|YP\_004335422.1| DNA-directed RNA polymerase subunit beta [Pseudonocardia dioxanivorans CB1190]

MAVSRATVTTATPGSAVSANPSFPGAPTRVVSFAKIREPLEVPDLDLQIQSFEWLVGSEAWFQRRIDAGD  
DNPVGGLEEILAEISPIEDFSGSMSLSFSDPRFDEVKASVEECRDKDMTYGAPLFVTAEFTNNTTGEIKS  
QTVFMGDFPVMTDKGTFIINGTERVVVSQLVRSFGVYFDHAIDKTTEKDVYSVKIIPSRGAWLEFDV  
DKRDTVGVRI DRKRRQPVTVLLKALGWTTNEQISERFGFSETIMATLEKDHTAGQDEALLDIYR  
KLRLPGEPPTR ESAQTLLENLFFKDKRYDLAKVGRYKANKKLGLAIDNSVGTLEEDIATTIEYLV  
RLHAGETSMAGGGNG TAGIPGEVVPVETDDIDHFGNRRRLRTVGELIQNQVRLGLSRMERVVRR  
MTTQDVEAITPQTLINIRPVVAAIKEFFGTSQLSQFMQHNPLAGLTHKRRLSALGPGGLSRERAG  
FEVRDVHPSHYGRMCPIETPEGPNI GLIGSLSTFAQVNPFGFIQTPYRKVVVDGVVTEQIDYLT  
ADEEDRFVIAQANAPLNDDGSFTEDRVLVRRK GGEVDLIPPTGVEYIDVSPRQMVSVATALIP  
FLEHDDANRALMGANMQRQSVPLLRSEAPLVGTGMELRA AVDAGDLVAEKAGVVEELCADIYI  
TVMADEGTRQTYRLNKFRRSNQGT CNNQKPIVDEGQ RVEVGVQVLAD GPCTENGEMALGKNLL  
VAIMPWEHNYEDAI ILSQRLVQDDVLSIHIIEHEIDARDTKLGAEETRDIP NVSEEVLADL  
DERGIIRIGAEVQPGDILVGKVT PKGETELTPEERLLRAIFGEKAREVRDTSKLVPHGEN  
GKVIGIRVFSRDEDELAPGVNELVRVYVAQKRKI QDGDKLAGRHGNKGVIGKILPAEDMPFLPD  
GTPVD IILNTHGVPRRMNIGQVLETHLGIWIAKSGWEIEGTP EWASKMPEELYSVAPNTNTAT  
PVFDGAKEHEITG LLASTRPNRDGDRMVGPDGKAQLFDGRSGEPYFPVAVGYMYILKLHLVDDKI  
HARSTGPYSMITQQPL GGKAQFGGQRF GEMEWCWAMQAYGAAYTLQELLTIKSDDVGRVKVY  
EAIVKGENIPEPGIPESFKVLLKE LQSLCLNVEVLSSDGAAIEMRDSDEDLERAANLGINL  
SSRPGSDSITVDDVVN



>gi|418460788|ref|ZP\_13031875.1| DNA-directed RNA polymerase subunit beta [*Saccharomonospora azurea* SZMC 14600]  
MQIRSFWEFTGSEAWYERAVNEGEENPVGGLLEVLNEISPIEDFSGSMSLSFSDFPRFDEVKASVEECKDK  
DMTYAAPLFFVTAEFVNNNTGEIKSQTVFMGDFPVMTDKGTFIINGTERVVVSQLVRSFVYFDQSVDKST  
DKDVFSVKIIPSRGAWLEFDVDRDVTGVRIDRKRQPVTVLLKALGWTAEQIRERFSFSETLLATLEKD  
STATQDEALLDIHRKLRPGEPPTKESAQALVENLFFKDKRYDLAKVGRYKVNKKLGLSLPYDTGTLTEDD  
IVATIEYLVRLHAGEETMRVGDVEVPVETDDIDHFGNRRIRTVGELIQNQIRVGLSRMERVVRRERMTTQD  
VEAITPQTLINIRPVTAAREFFFGTSQLSQFMDQNNPLSGLTHKRRLNALGPGGLSRERAGMDVRDVHPS  
HYGRMCPIETPEGNIGLIGSLSSYARVNPFGFIETPYRKVVVDGKVTDEVHYLTADEEDRFVKAQANAPL  
TEDGHFMEEQVLGRRKGGEEVELIDPMDVDYMDVSPRQMVSVATAMIPFLEHDDANRALMGANMQRAVPL  
LQAESPLVGTGVELAAAVDAGDVI VAE EAGVVEELSADMITVMQDDGTRRTYGLYKFRRTNAGTCFNHRP  
VVDEGDRVEKGQVLADGPSTDKGEMALGKNLLVAIMPWEGHNYEDAIVISQRLVQDDVLTSHIEEHEID  
ARDTKLGAEETTRDIPNVSEDVLDLDERGIVRIGAEVRDGDILVGKVTPKGETELTPEERLLRAIFGEK  
AREVRDTSKLVPHGETGKVI GVRVFSREDDDELPPGVNELVRVYVAKKSKI QDGDKLAGRHGKGVIGKI  
LPVEDMPFLEDGTPVDIVLNTHGVP RRMNIGQILEHLGLWLASQGWKVEGNPEWAKNLTEELMDVEPGTN  
TATPVFDGAREHELTGLLCAKPNRDGDRLVADDGKATLLDGRTGEPFPYPAVAGYMYILKLHMHVDDKI  
HARSTGPYSMITQQPLGGKAQFGGQRF GEMECWAMQAYGAAATLQELLTIKSDVLRVGVYEAIVKGEN  
MPSPGIPESFKVLLKELQSLCLNVEVLSTDGAAIEMRSDDEDLERAANLGINLSRNESPSVDDVVQ

>gi|257054452|ref|YP\_003132284.1| DNA-directed RNA polymerase subunit beta [*Saccharomonospora viridis* DSM 43017]  
MSPEGRILAVSPANQASAATNSNRPSTGIPGAPKRVSFGEIREPLGIPNLLDVQIQSFWEFTGSEAWYERA  
VNEGEENPVGGLLEVLNEISPIEDFSGSMSLSFSDFPRFDEVKASVEECKDKDMTYAAPLFFVTAEFVNHNTG  
EIKSQTVFMGDFPVMTDKGTFIINGTERVVVSQLVRSFVYFDQSIDKSTDKDVFSVKIIPSRGAWLEFDV  
DKRDTVGVRI DRKRQPVTVLLKALGWTAEQIRERFSFSETLLATLEKDPTTTQDEALLDIHRKLRPGEP  
TKESAQALVENLFFKEKRYDLAKVGRYKVNKKLGLNIPYDVGTLEEDIVATIEYLVRLHAGEETMKVGDV  
EVPVEVDDIDHFGNRRVRTVGELIQNQIRVGLSRMERVVRRERMTTQDVEAITPQTLINIRPVVAAIREFFG  
TSQLSQFMDQNNPLSGLTHKRRLNALGPGGLSRERAGMDVRDVHPSHYGRMCPIETPEGNIGLIGSLASH  
ARVNPFGFIETPYRKVVNGRVTDEVHYLTADEEDRFVKAQANAPLTEDGYFAEEKVLGRRKGGEEVELLDP  
EIDYMDVSPRQMVSVATAMIPFLEHDDANRALMGANMQRAVPLLRSEAPLVGTGVELPAAVDAGDVVVAE  
ESGVVEELSADMITIMQDDGTRRSYGLYKFRRTNAGTCFNHRP IVNEGDRVERGQVIADGPSTDKGEMALG  
KNLLVAIMPWEGHNYEDAIVISQRLVQDDVLTSHIEEYEIDARDTKLGAEETTRDIPNVSEDVLDLDER  
GIVRIGAEVRDGDILVGKVTPKGETELTPEERLLRAIFGEKAREVRDTSKLVPHGETGKVI GVRVFSREED  
DELPPGVNELVRVYVAKKSKI QDGDKLAGRHGKGVIGKILPVEDMPFLPDGTPVDVVLNTHGVP RRMNIG  
QIMELHLGLWLASQGWKVEGNPEWAKNLTEELRDVEPGTNTATPVFDGAREEEITGLLGCTKPNRDGQRLV  
PDGKATLFDGRTGEPFPYPAVAGYMYILKLHMHVDEKIHARSTGPYSMITQQPLGGKAQFGGQRF GEMECW  
AMQAYGAAATLQELLTIKSDVVRVGVYEAIVKGENMPSPGIPESFKVLLKELQSLCLNVEVLSSDGASI  
EMRSDDEDLERAANLGINLSRNESPSVDDVVQ

>gi|134103282|ref|YP\_001108943.1| DNA-directed RNA polymerase subunit beta [*Saccharopolyspora erythraea* NRRL 2338]  
MAVSRATKVSAAASNMSGIPGAPKRVSFANIREPLEVPDILLDLQVQSFEWLVGDETFWQRRVDAGDENPV  
GGLEEVLSSEISPIEDFSGSMSLSFSDFPRFDEVKASVEECKDKDMTYAAPLFFVTAEFVNTHTTGEIKSQTVF  
MGDFPVMTDKGTFIINGTERVVVSQLVRSFVYFDQSVDKTTDKDVYSVKIIPSRGAWLEFDVDRDVTG  
VRIDRKRQPVTVLLKALGWTAEAIRERFGFSETLMATLEKDHTAGQDEALLDIYRKL RPGEPPTKESAQ  
TLLENLFFKEKRYDLARVGRYKVNKKLGLDLPFESGVLTEEDIVTTIEYLVRLHAGEAEMPDRGQGGDAT  
IPVEVDDIDHFGNRRRLRTVGELIQNQVRVGLSRMERVVRRERMTTQDVEAITPQTLINIRPVVAAIKEFFG  
TSQLSQFMDQTNPIAGLTHKRRLSALGPGGLSRERAGMEVRDVHPSHYGRMCPIETPEGNIGLIGSLAT  
FARVNPFGFIETPYRKVV DGRVTDQIDYLTADEEDRFVKAQANTPIDDEGNFLADRVLGRRKGGEEVELLA  
PTEIDYMDVSPRQMVSAATAMIPFLEHDDANRALMGANMQRAVPLLRSEAPLVGTGMELRAAVDAGDVV  
TAEKAGVIEELCADYITVMADDGTRRTYRLQKFSRSNHGTCTNQKPIVNEGDRVEAGQVIADGPCTQNGE  
MALGKNLRVAIMPWEGHNYEDAII LSQRLVQDDVLTSHIEEHEVDARDTKLGAEETTRDIPNVSEDVLA  
DLDERGIRIGAEVQGGDILVGKVTPKGETELTPEERLLRAIFGEKAREVRDTSKLVPHGETGKVI GVRV  
FNREDDDELPPGVNELVRVYVAQKRKI QDGDKLAGRHGKGVIGKILPAEDMPFTEDGTPVDIILNTHGV  
PRRMNIGQILETHLGIASQGSIDGDEWAKRLPEELYDVDPGTNTASPVFDGAREEEITGLLASTKPN  
RDGERMVKANGKAQFLDGRSGEPYPAVAGYMYILKLSHLVDDKIHARSTGPYSMITQQPLGGKAQFGG  
QRF GEMECWAMQAYGAAATLQELLTIKSDVVRVGVYEAIVKGENIPEPGIPESFKVLLKELQSLCLN  
EVLSSDGAAIEMRSDDEDLERAANLGINLSRNESPSVDDVVQ

>gi|348176452|ref|ZP\_08883346.1| DNA-directed RNA polymerase subunit beta [*Saccharopolyspora spinosa* NRRL 18395]

MAVSRATKVSAA SNYTS GIPGAPKRVSFANI REPLNVPNLLDLQIQSFEWL VGNEAWFQRRVDAGEENPV  
GGLEEV LNEI SPIEDFSGSMSLSFS DPRFDEVKASVEECKDKDMTYAAPLFVTA EFTNHTTGEIKSQT VFMGDFP  
MGDFPMM SNKGT FII NGTERVVVS QLVRS PGVYFDQSV DKT TTDKDVFSVKI I PSRGAWLEFDV DKRDTVG  
VRIDRKR RQPVT VLLKALGWSAEAIRERFGFSETLMATLEKDHTAGTDEALLDIYRKL RPEGEPPTKESAQ  
TLLENLFFK EKRYDLARVGRYKVNKKLGMGEPYEVGV LTEEDIVTTIEYL VRLHAAETEMPARGQEGAT  
VPVEVDD IDHFGNRRIRTVGELIQNQVRVGLSRMERVVRRERMTTQDVEAITPQTLINIRPITAAIREFFG  
TSQLSQFMDQTNPIAGLTHKRRLNALGPGGLSRERAGMEVRDVHPSHYGRMCPIETPEGPNIGLIGSLAT  
FARINPFGF IETPYRKVV DGRVTDQIDYLTADEEDRYVKAQANAP IDEEDGNFIDERVLGRRKGGEVELLA  
PTEIDYMDVSPRQMVSAATAMIPFLEHDDANRALMGANMQRQAVPLLRSE SPLVGTGMELRAAVDAGDVI  
TAEKAGVVEELCADI TVMADDGTRRSYRMQKFSRSNHGTCINQRP IVNEGDRVEVGQVIADGPCTEDGE  
MALGKNLLVAIMPWEGHNYEDAIILSQRLVQDDVLT SIHIEEHEVDARDTKLGAEIITRDIPNVSDDLA  
DLDERGIIRIGAEVQGGDILVGKVT PKGETELTPEERLLRAIFGEKAREVRDTS LKVPHGETGKVI GVRV  
FNREDDDELPPGVNQLVRVYVAQKRKI QDGDKLAGRHGKNGVIGKILPAEDMPFLPDGTPVDIILNTHGV  
PRRMNIGQVLETHLGIASQGWSINGDAEWAKRLPDDLYEVEPGTNTASPVFDGAREEEITGLLASTRPN  
RDGERMVGADGKAQLFDGRSGEPYPYPIAVGYMYILKLSHLVDDKIHARSTGPYSMITQQPLGGKAQFGG  
QRFGEMECWAMQAYGAAYTLQELLTIKSDDVVGRVKVYEAIVKGENIPEPGIPESFKVLLKELQSLCLNV  
EVLSSDGAAIEMRDEDEDLERAANLGINLSRNESASVDDL AH

>gi|433609674|ref|YP\_007042043.1| DNA-directed RNA polymerase subunit  
beta [Saccharothrix espanaensis DSM 44229]

MAISRATKATAATNSTSGIPGAPKRVSFAKIH EPLQTPNLLDLQIQSFEWLTGDEAWFQRRVDEGDETPT  
GGLEEV LNEI SPIEDFSGSMSLSFS DPRFDEVKASTE ECKDKDMTYAAPLFVTA EFTNHTTGEIKSQT VFMGDFP  
MGDFPMM TDKGT FII NGTERVVVS QLVRS PGVYYDTAIDKT TTDKDVFSVKI I PSRGAWLEFDV DKRDTVG  
VRIDRKR RQPVT VLLKALGWSTEQIRERFSFSETLLTTLEKDHTAGTDEALLDIYRKL RPEGEPPTKESAQ  
ALLENLFFKDKRYDLAKVGRYKINKKLGLASPIATGVLTEDDIVTTIEYL VRLHAGETSMKPGETEVPVE  
VDDIDHFGNRRLR TVGELIQNQIRVGLSRMERVVRRERMTTQDVEAITPQTLINIRPVVAAIKEFFGTSQ L  
SQFMDQTNPLAGLTHKRRLSALGPGGLSRERAGMEVRDVHPSHYGRMCPIETPEGPNIGLIGSLSSYGRV  
NPFPGF IETPYRKVIEGRVTDQIDYLTADEEDRFVKAQANAKIDNEGNFLEAKVLVRKKGGGEVEQIDPLDV  
DYMDVSPRQMVSAATAMIPFLEHDDANRALMGANMQRQAVPLLRSE SPLVGTGMELRAAVDAGDVVVAK  
TGAVEEISADYVTVMADDGSRQTYGLHKFRRSNQGT C INQKPIVNEGDRVREGQVLADGPCTENGEMALG  
KNLLVAIMPWEGHNYEDAIILSQRLVQDDVLT SIHIEEHEIDARDTKLGAEIITRDIPNVSEEV LADLDE  
RGIIRIGAEVQPGDILVGKVT PKGETELTPEERLLRAIFGEKAREVRDTS LKVPHGEYGVIGIRVFSRE  
DDDELPPGVNELVRVYVAQKRKI QDGDKLAGRHGKNGVIGKILPVEDMPFLEDGTPVDIVLNTHGVPRM  
NIGQVLETHLGI AKQGWSINGDPDWAKNLPGE LYDVEPGTKTATPVFDGAREDEITGLLGSTV PNRDGE  
RMVKENGKAQLFDGRSGEPYPPVSVGYMYILKLLHLVDDKIHARSTGPYSMITQQPLGGKAQFGGQRFG  
EMECWAMQAYGAAYTLQELLTIKSDDV LGRVKVYEAIVKGENIPEPGIPESFKVLLKELQSLCLNVEVLS  
SDGAAIEMRDGDEDEDLERAANLGINLSRSESPSVDVVN

>gi|159039844|ref|YP\_001539097.1| rpoB gene product [Salinispora  
arenicola CNS-205]

MAASRPAKTSRTSSAFAPRRVSFGRITEHLEVPNLLAIQTESFDWL VGNEAWQGRSADDPHARSGLAEIL  
DEI SPIEDFSGTMSLSFSAPRFDEVKASIEECKEDLTYCAPLFVTA EFTNNTTGEIKSQT VFMGDFPMM  
TPKGT FII NGTERVVTS QLVRS SSGVYFDKQPKTSDRDLSSVKVIPSRGAWLEFDIDKRDTVGVRIDRKR  
RQAVTVLLKAI GWSAEQIREKFGWSELMMTTLEKDHIAGQDEALLDIYRKL RPEGEPPTRENAQTL LDNLF  
FNPKRYDVAKVGRYKFNKKLDDLPI DTGVL TQDDIVATVEYLCRLHAGEEGYEADDIDHFGNRRLR TVG  
ELIQNQVRVGLSRMERVVRRERMTTQDVEAITPQTLINIRPVVAAIKEFFGTSQLSQFMDQTNPLAGLTHR  
RRLNALGPGGLSRERAGFEVRDVHPSHYGRMCPIETPEGPNIGLIGNLSTFARVNPFGF IETPYRKVV D  
RVTDQVDYLTADDEDRFVKAQANAPLNADGSFAEDRVLVRRKGGETEDVAPSAVDYMDI SPRQMVSVGTA  
MIPFLEHDDANRALMGANMQRQAVPLVKA EAPLVGTGMEYRAAVDAGDVVVAEVGGVIEDLCADYVTIHQ  
DDGHRRTYLLHKFRRSNSGSCVNQKPVVFEGRVEAGQVIADGPCTDEGEMALGRNLLVAFMTWEGYNYE  
DAIILSQRLVQDDVLT SIHIEEHEVDARDTKLGPEEITRDIPNVSEEM LADLDERGIIRIGAEVVPGDVL  
VGKVT PKGETELTPEERLLRAIFGEKAREVRDTS LKVPHGETGTVIGVRTFSREDGDELPPGVNELVRVY  
VAQKRKI QDGDKLAGRHGKNGVISKILPVEDMPFLEDGTPVDIVLNPLGVPSRMNIGQVLETHLGVAKT  
GWKVEGDDAEWKRQLQAIGADESEPD SNVATPVFDGAREEEISGLLASTRSNRDGKQLIGSSGKAQLFDG  
RSGEPLPDI AVGYIYILKLNHLVDDKIHARSTGPYSMITQQPLGGKAQFGGQRFGEMECWAMQAYGAAY  
ALQELLTIKSDDV LGRVKVYEAIVKGENIPEPGIPESFKVLLKELQSLCLNVEVLS SDGVALEMRET DDE  
VFRAAEELGIDLSRREPSSVEEV

>gi|145596444|ref|YP\_001160741.1| rpoB gene product [Salinispora  
tropica CNB-440]

MAASRPAKTSRTSSAFAPRRVSFGRITEHLEVPNLLAIQTESFDWL VGNEAWQGRSADDPHARSGLAEIL

DEISPIEDFSGTMSLSFSAPRFDEVKASIEECKEKDLTYCAPLFTVTAEFNTNNTTGEIKSQTVFMGDFPMM  
TPKGTFIINGTERVVVSQLVRSFPGVYFDKQPKDTSRDLSSVKVIPSRGAWLEFDIDKRETVGVRIDRKR  
RQAVTVLLKAIGWTAEQIRERFGWSELMMTTLEKDHIASQDEALLDIYRKLRPGEPPPTRENAQTLNLF  
FNPVKRYDVAKVGRYKFNKKLELDLSIDTGVLTQDDIVATVEYLCRLHAGEEGYEADDIDHFGNRRRLRTVG  
ELIQNQVRVGLSRMERVVRRMTTQDVEAITPQTLINIRPVVAAIKEFFGTSQLSQFMDQTNPLAGLTHR  
RRLSALGPGGLSRERAGFEVRDVHPSHYGRMCPIETPEGPNIGLIGALSTFARVNPFGFIETPYRKVVDG  
RVTDQIDYLTADEEDRFVKAQANAPLRADGSFAEERVLVRRKGGETEDVPPAAVDYMDVSPRQMTSVATA  
MIPFLEHDDANRALMGANMQRQAVPLVKAEPVGTGMEYRAAVDAGDVVVAEFGGVVEDLCADYITVHQ  
DDGHRRTYLLHKFRRSNAGSCVNQKPVVFEEDRVEAGQVIADGPCCTDDGEMALGRNLLVAFMTWEGHNYE  
DAIILSQRQVQDVLTSIHIEEHEVDARDTKLGPEEITRDIIPNVSEEMLADLDERGIIRIGAEVVPDVL  
VGKVTQPKGETELTPEERLLRAIFGEKAREVRDTSCLKVPHGETGTVIGVRTFSREDGDELPPGVNELVRVY  
VAQKRKIQDGDKLAGRHGKNGVISKILPVEDMPFLEDGTPVDIVLNPLGVP SRMNIGQVLETHLGWVAKT  
GWKVEGDDAEWKRLQAI SADESEPDENVATPVFDGAREEEISGLLASTRANRDGKQLIGSSGKAQLFDG  
RSGEPLPDP IAVGYIYILKLNHLVDDKIHARSTGPYSMITQQPLGGKAQFGGQRFGEMECWAMQAYGAAY  
ALQELLTIKSDDVLGRVKVYEAIVKGENIPEPGIPESFKVLLKELQSLCLNVEVLSSDGVALEMRET DDE  
VFRAAEELGIDL SRREPSSVEEV

>gi|291298701|ref|YP\_003509979.1| DNA-directed RNA polymerase subunit  
beta [*Stackebrandtia nassauensis* DSM 44728]

MAASRPAKTSNQ SALAPNRISFGRITEHLEVPNLLALQTSDFDWLVGNDAYRARTTEAGATCGLDDILEEI  
SPIEDFSGTMSLSFSNPRFDEVKAPIEECKEKDLTYCAPLFTVTAEFINHNNTGEIKSQTVFMGDFPMMTPK  
GTFIINGTERVVVSQLVRSFPGVYFDKQPKDTSRDLSSVKVIPGRGAWLEFDIDKRETAGVRIDRKRQA  
VTVLLKAIGWTDQIRERFGWSEIMMATLEKDHVGSQDEALLDIYRKLRPGEPPPTKENAETLLDNLFFNP  
KRYDLAKVGRYQVKNKFGSLTPISTGVLTADLVSIIEYLCRLQNGEDGYDRDDIDHFGNRRIRTVGELI  
QNQVRVGLSRMERVVRRMTTQDVEAITPQTLINIRPVVAAIREFFGTSQLSQFMDQVNP IAGLTHRRRL  
NALGPGGLSRDRAAMEVRDVHPSHYGRMCPIETPEGPNIGLIGALAAFARVNPFGFIETPYRRIDNGRVT  
DDVKYLTADEEDRCVIAQANTKLNDDGTFAEERILVRRKGGEMELVGHDAVDYMDVSPRQMTSVATAMVP  
FLEHDDANRALMGANMQRQAVPLIKTQSPFVGTGMEYRAAVDAGDVVNEVAGVAEDVCADYITVHQDDG  
FRRTYLLHKFHRSNAGTCVNQIPVINEGDRVEAGQVMADGPCCTDKGEMALGKNLLVAFMPWEGQNYE  
DAIILSRLVQEDVLTSIHIDEHEVDARDTKLGPEEITREIPNVSEEMLSLDERGIIRIGAEVRDGDILV  
GKVTQPKGETELTPEERLLRAIFGEKAREVRDTSCLKVPHGESGTVIGVRTFSRDDGDELSPGVNELVRVYIAQ  
KRKISDGDKLAGRHGKNGVISKIVPAEDMPFLPDGTPVDVVLNPLGVPGRMNIGQVLELHLGWI  
AKSGWQ LAGDAEGWQKSLKAI GAEAEAPPDSTVATPVFDGVHLEEITGLLESARPNRDGDRMVGTDGKAKLFDGRTG  
EPFPGPISVGYMYILKLNHLVDDKIHARSTGPYSMITQQPLGGKAQFGGQRFGEMECWAMQAYGASYALQ  
ELLTIKSDDILGRVKVYEAIVKGENIPEPGIPESFKVLLKELQSLCLNVEVLSSDGTAVELRDSDEVFR  
AAEELGIDLSRHEPSSVDLEGA

>gi|21223036|ref|NP\_628815.1| DNA-directed RNA polymerase subunit beta  
[*Streptomyces coelicolor* A3(2)]

MAASRNASTANTNNAASTAPLRISFAKIKEPLEVPNLLALQTESFDWLLGNDAWKARVESALESGQDVPT  
KSGLEEIFEIEISPIEDFSGMSLTFRDHRFEPPKNSIDECKDRDFTYAAPLFTVTAEFNTNETGEIKSQTV  
FMGDFPLMTNKGTFVINGTERVVVSQLVRSFPGVYFDSSIDKTSKDIKIFSAKIIIPSRGAWLEMEIDKRD  
MV GVRIDRKRKQSVTVLLKALGWTTTEQILEEFGEYESMRATLEKDHTQGQDDALLDIYRKL  
RPGEPPPTREAA QTLLNLYFNPKRYDLAKVGRYKVNKKLGADEPLDAGVLTDDVIATIKYL  
VKLHAGETETVGESGREIV VETDDIDHFGNRRIRNVGELIQNQVRTGLARMERVVRRMTTQDVEAITPQTLINIRPVV  
ASIKEFFGTS QLSQFMDQNNPLSGLTHKRRLNALGPGGLSRERAGFEVRDVHPSHYGRMCPIETPEGPNIGLIGSLASYG  
RINPFGFIETPYRKVVEGQVTDVVDYLTADEEDRFVIAQANAALGDDMRFAEARVLVRRRGGVEVDYV  
PGD DVDYMDVSPRQMVSVATAMIPFLEHDDANRALMGANMMRQAVPLIKSESPLVGTGMEYR  
SAADAGDVVKA EKAGVVQEVSAADYITTTNDDGTIITYRLAKF SRSNQGTSVNQKVI  
VAEGDRIIEGQVLADGPATENGEMA LGKNLLVAFMPWEGHNYE  
DAIILSQRQVQDVLTSIHIEEHEVDARDTKLGPEEITRDIIPNVSEEV  
LADL DERGIIRIGAEVAGDILVGVKVTQPKGETELTPEERLLRAIFGEKAREVRDTSCLKVPHGEIGK  
VIGVRVFD REEGDELPPGVNQLVRVYVAQKRKITDGDKLAGRHGKNGVISKINPIEDMPFLEDGTPVDIILNPLAVPS  
RMNPGQVLEIHLGWLASRGWDVSGLAEEWAQRLQVIGADKVEPGTNVATPVFDGAREDEL  
AGLLQHTIPN RDGERMVLPSGKARLFDGRSGEPFPEPISVGYMYILKLNHLVDDK  
LHARSTGPYSMITQQPLGGKAQFGG QRFGEMECWALEYGAAYALQELLTIKSDDVTGRVKVYEAIVK  
GENIPEPGIPESFKVLIKEMQSLCLNVEVLSSDGMSIEMRDTDEDVFRAAEELGIDL  
SRREPSSVEEV

>gi|256814391|ref|ZP\_05539406.1| DNA-directed RNA polymerase subunit  
beta [*Streptomyces griseoflavus* Tu4000]

MAASRNASTANTNNGASTAPLRISFAKIKEPLEVPNLLALQTESFDWLLGNTAWQSRVEE  
ALESGHDVPTK SGLEEIFEIEISPIEDFSGMSLTFRDHRFEPPKNSIDECKERDFTYAAPLFTVTAEFNTNETGEIKSQTVFM

GDFPLMTNKGTFVINGTERVVVSQLVRS PGVYFDSSIDKTS DKDIFSAKII PSRGAWLEMEIDKRDMVGVR  
IDRKRKQSVTVLLKALGWTTEQILEEFGEYESMRATLEKDHTQGQDDALLDIYRKL RPGEPP TREAAQTL  
ENLYFNPKRYDLAKVGRYKVNKKLGGDEPLDAGVLTDDIIATIKYLVQLHAGETETVGGSGRSIIVETDD  
IDHFGNRRIRNVGELIQNQVRTGLARMERVVRERMTTQDVEAITPQTLINIRPVVASIKEFFGTSQLSQFM  
DQNNPLSGLTHKRRLNALGPGGLSRERAGFEVRDVHPSHYGRMCPIETPEGPNI GLIGSLASYGRINPFGF  
IETPYRKVVVDGQVTDEVDYLTADEEDRFVIAQANAPLNDEMRFVENRILVRRRGGEVDYVPGDEVDYMDVS  
PRQMVSVATAMIPFLEHDDANRALMGANMMRQAVPLIKSE SPLVGTGMEYRS AVDAGDVVKA EKDGVVQEV  
SADYITTANDDGTYITYRLAKFSRSNQGTSVNQKVI VNEGDRITITGQVLADGPATQNGEMALGKNLLVAFM  
PWEHNYEDAIILSQRLVQDDVLSIIHIEEHEVDARDTKLGPEEITRDI PNVSEEVLADLDERGIIRIGAE  
VIAGDILVGKVT PKGETELTPEERLLRAIFGEKAREVRDTS LKVP HGETGKVIGVRVFDREEGDELPPGVN  
QLVRVYVAQKRKITDGDKLAGRHGNKGVISKINPIEDMPFLEDGTPVDIILNPLGVPSRMNPGQVLEIHLG  
WLASRGWDVSGLAEEWAERLQVIGADKVEP GTNVATPVFDGAREDELAGLLQHTIPNRDGERMVLPSGKAR  
LYDGRSGEPFPEPISVGYMYILKLHHLVDDKLHARSTGYPYMITQQPLGGKAQFGGQRF GEMEVWALEAYG  
AAYALQELLTIKSDDVTRGVKYVEAIVKGENIPEPGIPESFKVLIKEMQSLCLNVEVLS SDGMSIEMRDT  
EDVFRAAEELGIDLSRREPSSVEEV

>lcl|SSMG\_00351T0 | SSMG\_00351 | Streptomyces sp\_AA4 DNA-directed RNA  
polymerase, beta subunit (1168 aa)

MAVSPANQATAATTSAESRAQATGIPGAPKRVSFAKIREPLSTPNLLDVQIQSFQWFTGNEAWFERRVNEG  
EENPVGGLEEV LNEISPIEDFSGSMSLSFSAPRFDEVKASIEECKDKDMTYAAPLFVTAEFVNNNTGEIKS  
QTVFLGDFPVM TDKGTFIINGTERVVVSQLVRS PGVYFDSSVDKTTDKDVF SVRVIPSRGAWLEFDVDKRD  
TVGVRIDRKRQSVTVLLKALGWTTEAIRERFSFSETLLATLEKDHTAGTDEALLDIYRKL RPGEPP TKES  
AQTLLENLFFKPKRYDLAKVGRYKVNKKLGLDTPYETGTLTEEDIVSAIEYLVRLHAGEDKMTSSAGVEVP  
VETDDIDHFGNRRLRV GELIQNQIRVGLSRTERVVRERMTTQDVEAITPQTLINIRPIGAAIKEFFGTSQ  
LSQFMDQNNPLSGLTHKRRLSALGPGGLSRERAGMEVRDVHPSHYGRMCPIETPEGPNI GLIGSLCSYARV  
NPFPGFIETPYRKVVEGQVTDQVDYLTADEEDRYVKAQANAPLTDGDFVVEEKVLGRRKGGEVELIDPLEID  
YMDVSPRQMVSVATAMIPFLEHDDANRALMGANMQRQAVPLLRNQAPYVGTGVELRAAVDAGDVLVAEQAG  
VVEELSADII TIMHDDGTRKSYGLYKFRSNHGTCFNHRPIVNEGDRVEQGV IADGPSTENGEMALGKNL  
LVAVMPWEHNYEDAIILSERLVQDDVLT SIIHIEEHEIDARDTKLGAE EITRDI PNVSEEVLADLDERGII  
RIGAEVRDGDILVGKVT PKGETELTPEERLLRAIFGEKAREVRDTS LKVP HGETGKVIGIRVFSREDDDEL  
PPGVNELVRVYVAQKRKI QPGDKLAGRHGNKGVIGKILPVEDMPFMEDGTPVDIILNTHGVP RRMNIGQIL  
ELHLGWLASQGW TIEGNPDWAKNLSPELYDVAPGTNTATPVFDGAKEEELTGLLGATKPNRDGERMVKENG  
KATLFDGRSGEPYPYPVSVGYMYILKLHHLVDDKIHARSTGYPYMITQQPLGGKAQFGGQRF GEMECWAMQ  
AYGAAYTLQELLTIKSDDVVGRVKVYEAIVKGENIPEPGIPESFKVLLKELQSLCLNVEVLS SDGAAIEMR  
DSDDEDLERAANLGINLSRNESPSVDDVVH

>gi|345850558|ref|ZP\_08803553.1| DNA-directed RNA polymerase subunit  
beta [Streptomyces zinciresistens K42]

MAASRTASNANTNNGASTAPLRISFAKIKEPLEV PNLALQTESFDWLLGNTAWQSRVEAALESGQDVPT  
KSGLEEIFE EISPIEDFSGSMSLTFRDHRFEPKNS IDECKDRDFTYAAPLFVTAEF TNNETGEIKSQT  
FMGDFPLMTHKGT FVINGTERVVVSQLVRS PGVYFDSSIDKTS DKDIFSAKVI PSRGAWLELEIDKRDMV  
GVRIDRKRKQSVTVLLKALGWTTEQILEEFGEYESMRATLEKDHTQGQDDALLDIYRKL RPGEPP TREAA  
QTLLENLYFNPKRYDLAKVGRYKVNKKLGA EAPLDAGVLTVEDVISTIKYLVKLHAGETETVGD SGNTIV  
VETDDIDHFGNRRLRV GELIQNQVRTGLARMERVVRERMTTQDVEAITPQTLINIRPVVASIKEFFGTS  
QLSQFMDQNNPLSGLTHKRRLSALGPGGLSRERAGFEVRDVHPSHYGRMCPIETPEGPNI GLIGSLASYG  
RVNAFGFVETPYRKVV DGRVTDEVDYLTADEEDRFVIAQANATLNDDMRFAENRVLVRRRGGEVDYVAGD  
DVDYMDVSPRQMVSVATAMIPFLEHDDANRALMGANMMRQAVPLIKSE SPLVGTGMEYRS AVDAGDVVKA  
EKAGVVQEV SADYITTANDDGTYITYRLAKFARSNQGTSVNQKVI VNEGDRIEEGQVLADGPATENGEMA  
LGKNLLVAFMPWEHNYEDAIILSQRLVQDDVLSIIHIEEHEVDARDTKLGPEEITRDI PNVSEEVLADL  
DERGIIRIGAEVVAGDILVGKVT PKGETELTPEERLLRAIFGEKAREVRDTS LKVP HGETGKVIGVRVFD  
REEGDELPPGVNQLVRVYVAQKRKITDGDKLAGRHGNKGVISKILP IEDMPFLEDGTPVDIILNPLGVPS  
RMNPGQVLEIHLGWLASRGWDVSGLADEWAQRLQVIGADQVDPGTNVATPVFDGAREDELAGLLQHTIPN  
RDGERMVLPSGKARLFDGRSGEPFDPISVGYMYILKLHHLVDDKLHARSTGYPYMITQQPLGGKAQFGG  
QRF GEMEVWALEAYGAAYALQELLTIKSDDVTRGVKYVEAIVKGENIPEPGIPESFKVLIKEMQSLCLN  
VEVLS SDGMSIEMRDTDEDVFRAAEELGIDLSRREPSSVEEV

>gi|271962625|ref|YP\_003336821.1| unnamed protein product  
[Streptosporangium roseum DSM 43021]

MAASRNASAVPAGPRRVSFARIQE PLEVPDLLALQTESFDWLLGNEKWKGRVEAARQAGRKDVP AQSGLE  
EIFEEISPIEDFSGTMSLSFRDHRFEPKYSVDECKDKDMTYSAPMFVTAEF INNTTGEIKSQT VFMGDF  
PLMTGKGTFIINGTERVVVSQLVRS PGVYFDSSVDKTS DKDLYGCKVI PSRGAWLEFEIDKRDSVGVRI

RKRKQAVTVLLKALGWTNDQILERFGQYESMRATLEKDHTAGQDDALLDIYRKLRLPGEPPPTKESAQTLLE  
NLYFNHKKRYDLAKVGRYKINKKLGVDSEITQGTLTTEEDIVATIEYIVKLHAGETSMAGANGEIVVETDDI  
DHFGNRRRLRTVGELIQNQVRLGLARMERVVRRMTTQDVEAITPQTLINIRPVVASIKEFFGTSQLSQFM  
DQTNPLAGLTHKRRLSALGPGGLSRERAGFEVRDVHPSHYGRMCPIETPEGPNIIGLIGSLASFGRVNSFG  
FVETPYRKVLDGRVTDTVEYLTADEEDRYVIAQANTPIGSDGTFLEDRVLVRRKGGEFESLRANEVDYMD  
VSARQMVSVATAMIPFLEHDDANRALMGSNMQRQSVPLLKSEAPLVGTGMEYRAATDAGDVI TADKAGVV  
EEVSADYVTVMNDDGTRTTYRVAKFKRSNQGTCTFNQKPIVKEGDRIEVNQVADGPCTDDGEMALGKNLL  
VAFMPWEGHNYEDAIILSQRLVQDDVLSIIHIEEHEVDARDTKLGPEEITRDI PNVSEEV LADLDERGII  
RIGAEVVPGDILVGKVT PKGETELTPEERLLRAIFGEKAREVRDTS LKVPHGEGQKVI GVRVFSREEGDE  
LPPGVNELVRVYVAQKRKITDGDKLAGRHGKGVISKILPVEDMPFLEDGTPVDIILNPLGVPGRMNVGQ  
VLETHLGWIAARGWDISGIEEAWAERLRDKGFAEVDPRTNMATPVFDGANEEEEIVGLLDNTLVNRDGGRM  
VGANGKAQLFDGRSGEPFPHPI SVGYIYILKLLHLVDDKIHARSTGPYSMITQQPLGGKAQFGGQRF GEM  
EVWALEAYGAAYALQELLTIKSDDVLGRVKVYEAIVKGENIPEPGIPESFKVLIKEMQSLCLNVEVLSSD  
GMSIEMRDTEDEVFRAAEELGIDLSRREPSSVEEV

>gi|72163053|ref|YP\_290710.1| rpoB gene product [Thermobifida fusca YX]  
MAASRIASANALGPNRVSFARIKEPLEV PNLALQTESFDWLLGNERWRARVEAARKAGRKDIPEQSGLE  
EIFEEISPIEDFSGTMSLSFRDHRFEPPKYSEEECKDKDMTYSAPMFVTAEFINNDTGEIKSQTVFMGDF  
PLMTAKGTFIINGTERVVVSQLVRS PGVYFDSQMDKSSDKELYGCKIIPSRGAWLEFEIDKRDFVGVRI  
RKRKQAVTILLKALGWTTDQILERFGYESIRATLEKDPTAGTDDALLDIYRKLRLPGEPPPTKEAAQALLE  
NLYFNPKRYDLAKVGRYKINKKLGLEIDITQGTLTTEEDIVATVDYLVRLHAGEKELVRPHGTFPIEVDDI  
DHFGNRRRLRTVGELIQNQVRLGLARMERVVRRMTTQDVEAITPQTLINIRPVVASIREFFGTSQLSQFM  
DQTNPLAGLTHKRRLSALGPGGLSRERAGFEVRDVHPSHYGRMCPIETPEGPNIIGLIGSLAAYARVNSFG  
FIETPYRKVV DGRITDEVVYLTADEEDRYVIAQANTPVNPDGTFAESQVLARRKGGEFESVAAEEVHYMD  
ISPRQMVSVATAMIPFLEHDDANRALMGSNMQRQAVPLLRAEAPLVGTGMEYRAATDAGDVI LAEKSGVV  
EDVTADYITVLADDGTRKTYRVHKFRRTNQGTCTFNQRPIVEEGQRVEEGQVLADGPSTEAGEMALGKNLL  
VAYMSWEGHNYEDAI VLSQRLVEEDILSSIIHIEEHEVDARETKLGPEEITREIPNVSEEV LADLDERGII  
RIGAEVVDGDILVGKVT PKGETELTPEERLLRAIFGEKAREVRDTS LKVPHGESGKVI GVRVFSREEGDE  
LPPGVNELVRVYVAQKRKITDGDKLAGRHGKGVIAKILPKEDMPFLEDGTPVDIVL NPLGVPGRMNIGQ  
IMEMHLGWLAKHGKVEGDAAEWKRRLRDIGAHEAPPNSKVATPVFDGAREDEISGLLSCVLPDQGDIL  
VNKFGKAKLYDGRTEGPFKEPVAVGAYFLKLLHLVDDKIHARSTGPYSMITQQPLGGKAQFGGQRF GEM  
EVWALEAYGAAYALQELLTIKSDDINGRVKVYEAIVKGENIPEPGIPESFKVLIKEMQSLCLNVEVL SRD  
GMSIEMRDSEEDVFRAAEELGIDLGRREPSSVEEV

>gi|296268531|ref|YP\_003651163.1| DNA-directed RNA polymerase subunit  
beta [Thermobispora bispora DSM 43833]  
MAASRNASAAAFASPRLSFARIQEPLV PDLAVQIESFDWLLIGNERWKARVEAARKAGRKDIPMQSGLEE  
VFEEISPIEDFSGTMSLSFRDHRFEPPKHTIEECRDKDMTYSASLFTAEFINNTTGEIKSQTVFMGDFP  
LMTPKGTFIINGTERVVVSQLVRS PGVYFDRTVDKTSDKDVYSCKIIPSRGAWLEFEIDKRDSVGVRI  
RKRKQAVTVLLKALGWTNDRI LERFGQYESMRATLEKDHTTGQEDALIDIYRKLRLPGEPPPTKESAQALLEN  
LYFNPKRYDLAKVGRYKLNKLGVDADITQGTLTEDDIVATIEYLVRLHAGEETMIGANGREVIVETDDI  
DHFGNRRRLRTVGELIQNQVRLGLARMERVVRRMTTQDVEAITPQTLINVRPVTASIREFFGTSQLSQFM  
DQTNPLAGLTHKRRLNALGPGGLSRERAGFEVRDVHPSHYGRMCPIETPEGPNIIGLIGSLATYARVNAFG  
FVETPYRKVV DGRVTDQIEYLTADEEDRYVVAQANTVVNPDGTFAEKRVLARRKGGEFEA VDPSEVDYMD  
VSPRQMVSVATAMIPFLEHDDANRALMGSNMQRQAVPLLRSEAPLVGTGMEYRAATDAGDVI IAEKSGVV  
EEVSADYITVLNDDGTRTTYRVVKFKRSNQGTCTYNQKPIVEEGDRVEQGQVIADGPCTENGEMALGKNLL  
VAFMPWEGHNYEDAIILSQRLVQDDVLT SIIHIEEHEVDARDTKLGPEEITRDI PNVSEEV LADLDERGII  
RIGAEVTTGDILVGKVT PKGETELTPEERLLRAIFGEKAREVRDTS LKVPHGESGKVI GVRVFRREDGDE  
LPPGVNELVRVYVAQKRKITDGDKLAGRHGKGVIAKILPVEDMPFLEDGTPVDIILNPLGVPGRMNLGQ  
VLETHLGWAAKQWDISGVEEAWAKRLREKGMKVGPDTKVATPVFDGAREEEIVGLLQHTLPNRDQRL  
VGPNGKAILYDGRSGEPFPYPVSVGYIYILKLAHLVDDKIHARSTGPYSMITQQPLGGKAQFGGQRF GEM  
EVWALEAYGAAYALQELLTIKSDDVTGRVKVYEAIVKGENIPEAGIPESFKVLIKEMQSLCLNVEVLSSD  
GMSIEMRAEEDVFRAAEELGIDLSRREPSSVEEV

>gi|269128533|ref|YP\_003301903.1| DNA-directed RNA polymerase subunit  
beta [Thermomonospora curvata DSM 43183]  
MAASRNASNTVTGPNRVSFARIKEPLEV PDLALQTD SFDWLLGNERWKARVEAALKAGVRDIPTQSGLE  
EIFEEISPIEDFSGTMSLSFRDHRFEPPKY SIEECRDKDMTYSAPMFVTAEFINNSTGEIKSQTVFMGDF  
PLMTPKGTFIINGTERVVVSQLVRS PGVYFDRSLDKASDKDIYGCR IIPSRGAWLEFEIDKRDNVGVRI  
RKRKQAVTVLLKALGWTEARIREHFGAYESMNITLEKDHTSGQDDALLDIYRKLRLPGEPPPTKESAQALLE  
NLYFNPKRYDLAKVGRYKVNKKG LGLRLDMNQGTLTEDDIVATIEYLVRLHAGEEEAVLTAAGPEGVSPI

EIDDIDHFGNRRRLRTVGEIIONQVRLGLARMERVVRRERMTTQDVEAITPQTLINIRPVVASIKEFFGTSQ  
LSQFMDQTNPLAGLTHKRRLSALGPGGLSRERAGFEVRDVHPSHYGRMCPIETPEGPNIGLIGSLSAYGR  
VNPFGFIETPYRKVVDGRVTDEIHYLTADEEDRYIKAQANSPLNPDGTFAEKVLVVRTKGGEIEYLPPEE  
VHYMDVSPRQMTSVATAMIPFLEHDDANRALMGSNMQRQAVPLLRSEAPLVGTGMEYRAATDAGDVILAE  
KPGVVEEVSADYITVLNDDGTRTTYRVAKFKRSNQGTCFNQKPIVDEGQORVEAGQVIADGPCTDQGEMAL  
GKNLLVAFMPWEGHNYEDAIILSQRLVQDDVLSIIHIEEHEVDARDTKLGPEEITRDI PNVS E EVLADLD  
ERGIIRIGADVVPGDILVGKVT PKGETELTPEERLLRAIFGEKAREVRDTS LKVPHGEQ GKVIGVRVFSR  
EEGDELPPGVNELVRVYVAQKRKITDGDKLAGRHGNKGVI AKILPVEDMPFLEDGTPVDIILNPLGV PGR  
MNVGQVLETHLGWVASQGWKIEGDDADWKRSLQAIGATEAGPWTKTATPVFDGAREEEITGLLSCTLPNR  
DGMRLIGPNGKAKLYDGRTGEPFKDPIAVGYIYILKLLHLVDDKIHARSTGPYSMITQQPLGGKAQFGGQ  
RFGEMEVALEAYGAAYALQELLTIKSDDVLGRVKVYEAIVKGENIPEPGIPESFKVLKEMQSLCLNVE  
VLSSDGMSIEMRDSDEDVFRAAEELGIDLSRREPSVVEEV

>gi|330470182|ref|YP\_004407925.1| rpoB gene product [Verrucosipora  
maris AB-18-032]

MAASRPAKTSRTSSAFAPRRVSFGRITEHLEVPNLLAIQNESFDWLVGNEAWQGRSADDPHARSGLAIEIL  
DEISPIEDFSGTMSLSFSAPRFDEVKASIEECKEDLTYCAPLFVTAFTNNTTGEIKSQTVFMGDFPMM  
TPKGTFIINGTERVVVSQVLRSPGVYFDKQPKTSDRDLSSVKVIPSRGAWLEFDIDKRDTVGVIRDRKR  
RQAVTVLLKAIGWSAERIREKFGWSELMMTTLEKDHIAGQDEALLDIYRKL RPGEPP TRENAQTLLDNLF  
FNP KRYDVAKVG RYKFNKKLELDVPI TTGTLTEDDIVATVEYLCRLHAGEEGYEADDIDHFGNRRRLRTV  
GELIQNQVRVGLSRMERVVRRERMTTQDVEAITPQTLINIRPVVAAIREFFGTSQLSQFMDQTNPLAGLTHR  
RRLSALGPGGLSRERAGFEVRDVHPSHYGRMCPIETPEGPNIGLIGALSTFARVNPFGFIETPYRKVVDG  
RVTDQIDYLTAEEDRFVKAQANAPLRADGTF AEDRVLVRRKGGETEDVPPAAVDYMDVSPRQMTSVATA  
MIPFLEHDDANRALMGANMQRQAVPLVKAESPLVGTGMEYRAAVDAGDVVVAE VGGVVEDLCADYITVHQ  
DDGHRRTYLLHKFRRSNAGSCVNQKPVVFE GDRVEAGQVIADGPCTDEGEMALGRNLLVAFMCWEGHNYE  
DAIILSQRLVQQDVLTSIIHIEEHEVDARDTKLGPEEITRDI PNVS E EMLADLDERGIIRIGAEVVPGDIL  
VGKVT PKGETELTPEERLLRAIFGEKAREVRDTS LKVPHGETGTVIGVRTFSREDGDELPPGVNELVRVY  
VAQKRKITDGDKLAGRHGNKGVISKILPVEDMPFLEDGTPVDI VLNPLGVPSRMNIGQVLETHLGWVAKT  
GWKVEGDDAEWKRQLQSIGADSSEPDTNVATPVFDGAREEEISGLLASTLPNRD GKQLIGATGKAQLFDG  
RSGEPLPDP IAVGYIYILKLNHLVDDKIHARSTGPYSMITQQPLGGKAQFGGQRFGEME CWAMQAYGAAY  
ALQELLTIKSDDVLGRVKVYEAIVKGENIPEPGIPESFKVLLKELQSLCLNVEVLSSDGVALEMRET DDE  
VFRAAEELGIDLSRREPSVVEEV

### Supplemental Data file 3. SsgB protein sequences from actinomycetes used as input for Figure 3.

>gi|117928576|ref|YP\_873127.1| sporulation and cell division protein SsgA [*Acidothermus cellulolyticus* 11B] (Acel\_1369)  
MNASVHIIIEVTEFHLLLDGDSRVITARLHYDPADPYVITVHFDTGVTWVLGRDLLADGLH  
MEIGDGDVHLRPEGDQLFLTLRSPSGEALLAASRSAIAGFMADTERVVPRGTEHLRVDLD  
KELARLLP

>gi|383781699|ref|YP\_005466266.1| unnamed protein product [*Actinoplanes missouriensis* 431] SsgB 40% AMIS\_65300  
MSTIRPTTVEVETSLRLVAPDATALPVRASLRYPADPYAVHVLFAESAGGEAVSWSFARELLVTGLDE  
PAGIGDVRVWPWATPRGDFVALALSSPDGNALFEVPRSVLVRFLRRTYVVVPRGRESHDLDVDAVNRL  
AGR

>gi|359839220|gb|AEV87661.1| sporulation and cell division protein SsgA [*Actinoplanes* sp. SE50/110] ACPL\_6779 SCO1541 50%  
MSTIRPTTVEVETSLRLVAPDATALPVRASLRYPSPDYAVHVLFAESAGGEAVSWSFARELLVTGLDE  
PAGIGDVRVWPWATPRGDFVALALSSPDGNALFEVPRSVLVRFLRRTYVVVPRGRESEHLDVDAVNRL  
AGR

>gi|256376149|ref|YP\_003099809.1| sporulation and cell division protein SsgA [*Actinosynnema mirum* DSM 43827] (Amir\_2015)  
mrndhvtlrstafdllaprtppavpvqvelrydtkdpyaviaafrtgragwvewvfardl  
ladgliadagdgdvirpaaddpevvvielsspsghamfeasaqeladfldrtydvvpvg  
nehlwvdvdealthlisndls

>gi|399539086|ref|YP\_006551748.1| sporulation and cell division protein SsgA [*Amycolatopsis mediterranei* S699]  
MRNDHVTLRSTAVFDLLAPRTPAVPVKVELRYDTRDPYAVVAAFRTGRAGWVEWVYARDLLADGLLADAG  
DGDVIRIRSVEDPEAVLIELNSPSGHAMFEASAQELADFLDRTYDVVLPGNEHLWVDVDDALTHLIPHDL  
A

>gi|300787203|ref|YP\_003767494.1| sporulation and cell division protein SsgA [*Amycolatopsis mediterranei* U32] (Amed\_5330)  
mrndhvtlrstafdllaprtppavpvkvelrydtrdpyavvaafirtgragwvewvyardl  
ladglladagdgdvirpsvedpeavlielnspsghamfeasaqeladfldrtydvvlpg  
nehlwvdvddalthliphdla

>gi|379735734|ref|YP\_005329240.1| unnamed protein product [*Blastococcus saxobidens* DD2] BLASA\_2304 SsgB 40%  
MPGHISPITLQLIGPQSWTEVPALLCYDPADPFAVRIAFGDPGEQDPADGDEGIAWLVSRELLQAGLEHP  
AGDGDVRVWPAHATADVFLHLRAPSGEALFELSRTVA AFLRHTEALVPTGSETGLLHLDQELDALLSN  
GGPDAPGR

>gi|256391413|ref|YP\_003112977.1| sporulation and cell division protein SsgA [*Catenulispora acidiphila* DSM 44928] (Caci\_2217)  
msssvtcelqlrlvisgdsslvpvpaglrydtadpyavhatfhtggqdtvdwvfarellae  
glrrptgtgdvrvwpsrsrgqaivclalsspegealleaparalesflkrntavppgle  
hrfyldaelvhlfadn

>gi|332670552|ref|YP\_004453560.1| sporulation and cell division protein SsgA [*Cellulomonas fimi* ATCC 484] Celf\_2043  
MTQSSYDVVEVAMQLIGSDASVIPVSAELSFRTSDPYTVRAVFTGPHTMSTWLLGRELLSLGMLASADA  
PAGTGDVQVWRDEDPDYTLVSLNGVEGSALLAAPTEPITRFLASTEALVPLGAESARMESEITALIAALL  
TA

>gi|296129627|ref|YP\_003636877.1| unnamed protein product [*Cellulomonas flavigena* DSM 20109] (Cfla\_1781)  
madtsydvievvamqligsdavtipvsaemcfrtsdpytvravftgahtmstwillgrell  
aggvhavadapagtgdvqvwrdddpdytlvslsgvegsallaaptepllrflaateslvp  
igaesdkmegeitaliaallta

>gi|336320679|ref|YP\_004600647.1| sporulation and cell division protein SsgA [*Cellulomonas gilvus* ATCC 13127] Celgi\_1568  
MTHSSYDVVEVAMQLIGSDASVIPVSAELSFRTTDPYTVRAVFTGPHTMSTWLLIGRELLSMGMHAAADA  
PAGSGDVQVWRDEDPDYALVSLSGVEGSALLAAPSEPIRFLATTESLVPLGSESDRMESEISAFIAALL

TA

>gi|111221561|ref|YP\_712355.1| unnamed protein product [Frankia alni ACN14a] (FRAAL2127)  
MPVAATVRYEPADPYAISIGFRTGADEVVEWTFARQLLSDGVRRPAGDGDVQVWPAAQSG  
GRIVCLSLSSPSGHALFEMPRSEVLAFLRRTYSAVPLGGESDIIDLDAELALLIWGGPER

>gi|158316914|ref|YP\_001509422.1| sporulation and cell division protein SsgA [Frankia sp. EAN1pec] Franean1\_5158  
MTIRHDSITAELALRLVVPGGAPVPVAATVRYEPADPYAVSIGFRTGADEVVEWTFARQLLSDGVRRPAG  
DGDVQVWPAAQSGGRIVCLSLSSPSGHALFEMPRAEVLAFLRRTYSAVPLGGESDVIDLDAELALLIWGG  
PER

>gi|86740065|ref|YP\_480465.1| sporulation and cell division protein SsgA [Frankia sp. CcI3] Francci3\_1359  
MTIRHDSITAELALRLVVPGGAPVPVAATVRYEPADPYAISIGFRTGADEVVEWTFARQLLSDGVRRPAG  
DGDVQVWPAAQSGGRIVCLSLSSPSGHALFEMPRSEVLAFLRRTYSAVPLGGESDIIDLDAELALLIWGG  
PER

>gi|358463323|ref|ZP\_09173392.1| sporulation and cell division protein SsgA [Frankia sp. CN3] FrCN3DRAFT\_8065  
MTIRHDSITAELALRLVVPGGAPVPVAATVRYEPDDPYAVSIGFRTGADEVVEWTFARQLLSDGVRRPAG  
DGDVQVWPAAQSGGRIVCLSLSSPSGHALFEMPRSEVLAFLRRTYAAVPLGSESDVIDLDAELALLIWGG  
PDR

>gi|288922741|ref|ZP\_06416912.1| sporulation and cell division protein SsgA [Frankia sp. EUN1f] FrEUN1fDRAFT\_6610  
MTIRHDSITAELALRLVVPGGAPVPVAATVRYEPADPYAVSIGFRTGADEVVEWTFARQLLSDGVRRPAG  
DGDVQVWPAAQSGGRIVCLSLSSPSGHALFEMPRAEVLAFLRRTYAAVPLGGESDVIDLDAELALLIWGG  
PER

>gi|392943918|ref|ZP\_10309560.1| sporulation and cell division protein, SsgA [Frankia sp. QA3]  
MTIRHDSITAELALRLVVPGGAPVPVAATVRYEPADPYAISIGFRTGADEVVEWTFARQLLSDGVRRPAG  
DGDVQVWPAAQSGGRIVCLSLSSPSGHALFEMPRSEVLAFLRRTYSAVPLGGESDIIDLDAELALLIWGG  
PER

>gi|336178472|ref|YP\_004583847.1| sporulation and cell division protein SsgA [Frankia symbiont of Datisca glomerata] FsymDg\_2563  
MTIRHDSITAELALRLVVPGGAPVPVAATMRYEPADPYAVSIGFRTGADEVVEWTFARQLLSDGVRRPAG  
DGDVQVWPAAQSGGRIVCLSLSSPSGHALFEMPRSEVLSFLRRTYSVVPLGGESEVVDLDAELALLIWGG  
PQT

>gi|284991618|ref|YP\_003410172.1| sporulation and cell division protein SsgA [Geodermatophilus obscurus DSM 43160] (Gobs\_3195)  
minratpgytcpttlhlgvqswtevpallsyeirdpfavritfgdhaeedgiswlvgrd  
llhagldqpagegdvrlwpsrtsgdvlfhlhrapsgealfevsrgtvagflqltasvvpf  
geessvlqvdlgelaallnnggadptgr

>gi|152967013|ref|YP\_001362797.1| sporulation and cell division protein SsgA [Kineococcus radiotolerans SRS30216]  
mpalphrktevdvdvslrlrttsqpglpvpsalhygaddpyaihavfrggdtdvewvfar  
dllreglsapagagdvqvqpcsdspdgrprvllrlsspdgnaeleadesdvrrflrrada  
lvppgretrhldldeliarlv

>gi|357388405|ref|YP\_004903244.1| ssgB gene product [Kitasatospora setae KM-6054]  
mnttvscelhlrlivssesslpvpaglrydtadpyavh  
atfhtgadetviewfardllaeglhrrptgtgdvrvwpsrshgqgvvcialsspegealle  
aparalesflkrtdaavppgtehrhfdldrelshilaen

>SsgB\_Kutzneria\_sp744\_KUTG\_02305 not on GenBank  
MRNDHVTLRSTAVFDLLAPRTPAVPVQVELRYDTRDPYAVVAAFRTGRAGWVEWVYARDL  
LADGLIAEAGDGDVRIKIPATDDPEVVVIELNSPSGHATFEAASEELADFLDRTYDVVVVPG  
NEHLWVNVDQALTHLISNDMS

>gi|302866229|ref|YP\_003834866.1| sporulation and cell division protein SsgA [Micromonospora aurantiaca ATCC 27029]  
MSVIRPTTVEVETSLRLVAPDATAALPVRASLRYDPADPYAVHVLFAESAGGEAVSWSFARELLVTGLDE  
PAGIGDVRVWPWATPRGDFVALALSSPDGNALFEVPRSVLVRFLRRTYVVVPRGREAEHLVDVTAVNRL



AGR  
>gi|443289776|ref|ZP\_21028870.1| Sporulation and cell division protein SsgA [*Micromonospora lupini* str. Lupac 08]  
MSVIRPTTVEVETSLRLVAPDATAALPVRASLRYPADPYAVHVLFAESAGGEAVSWSFARELLVTGLDE  
PAGIGDVRVWPWATPRGDFVALALSSPDGNALFEVPRSVLVRFLRRTYVVVPRGREAEHLDVDVAVNRL  
AGR  
>gi|238063620|ref|ZP\_04608329.1| sporulation and cell division protein ssgA [*Micromonospora* sp. ATCC 39149] (Mcag\_04586)  
MSVIRPTTVEVETSLRLVAPDATAALPVRASLRYPADPYAVHVLFAESAGGEAVSWSFARELLVTGLDE  
PAGIGDVRVWPWATPRGDFVALALSSPDGNALFEVPRSVLVRFLRRTYVVVPRGREADHLDVDVAVTRLL  
AGR  
>gi|315502787|ref|YP\_004081674.1| sporulation and cell division protein ssga [*Micromonospora* sp. L5]  
MSVIRPTTVEVETSLRLVAPDATAALPVRASLRYPADPYAVHVLFAESAGGEAVSWSFARELLVTGLDE  
PAGIGDVRVWPWATPRGDFVALALSSPDGNALFEVPRSVLVRFLRRTYVVVPRGREAEHLDVDVAVNRL  
AGR  
>gi|389865025|ref|YP\_006367266.1| sporulation and cell division protein, SsgA [*Modestobacter marinus*]  
MARSSRSRGCTARTTFHLVGPQSWTAVPAALVYDSSDPFAVRVRFGDGATDDVEPALYDDPDDGGVEWLL  
SRDLLRAGLTGVPVGEDEVRLWPARGGLDVLFLQLRAPSGEAMFELSGAVVGDVFLRETELLVPAGGESDLL  
RVDEELSALLRGGTDNPTGR  
>gi|258653633|ref|YP\_003202789.1| sporulation and cell division protein SsgA [*Nakamurella multipartita* DSM 44233] (Namu\_3475)  
mydfntveyrmtatvtvtemvlisdptmppvhaelrrysddpfavqlllsidqspaitwvfg  
rdllvegvgqapagigdvqvfpvldgtvielrsgeqvasllahtqdlaaflhdhsieivpsg  
sesayfeieadlrdlpihdafea  
>gi|326331443|ref|ZP\_08197733.1| sporulation and cell division protein SsgA [*Nocardioideae bacterium Broad-1*]  
MSDIKHPAVQQDIKISCLDPWGRTVEVPTTLGYRENDPYAVSLTFHSGAGDVEWVVSRTLMLQGLSAPAG  
EGDVKIYPSIDEDAKAVAVFDFSSPDGRLIATADSGEVQTFLGKSFSAVPVGSSESQHMDLDALIADLLSS  
SFDAE  
>gi|119716595|ref|YP\_923560.1| unnamed protein product [*Nocardioideae* sp. JS614] (Noca\_2368)  
mdlpatfgydpadpwavwitfrgprdevrwavgrdlllqgltdpagegdiqlwpsidehg  
raavvmelcspdgrrlvtqlhthelyrfltrtlaivpvgseaidlddlvaeltgisrae  
>gi|403507738|ref|YP\_006639376.1| putative regulator [*Nocardiosis alba* ATCC BAA-2165]  
MNSSDITATAELGLRLVVPERTAVPLVARLDYSADDPYAIRVAFHTGEDSPVEWIFARELLTVGIVRPVG  
EGDVRVWPSKSEGGERSVSISSPFGQAEFDTQVSPLAEFLHRTYEIVPAGQEGSFVDLDEEIQHLHS  
>gi|297562209|ref|YP\_003681183.1| sporulation and cell division protein SsgA [*Nocardiosis dassonvillei* subsp. *dassonvillei* DSM 43111] (Ndas\_3271)  
mnssdtataaelglrlvvpertavplvarldysaddpyairvafhtgednpvewifarel  
ltvgivrvpvggdvrvwpskddngdrsvsialsspfgqaeftqvsplaeflhrtyeivp  
agqegqfvnldeeiqhlhs  
>gi|331695878|ref|YP\_004332117.1| sporulation and cell division protein SsgA [*Pseudonocardia dioxanivorans* CB1190]  
MRDVTNICKQTVFELIAPDSTVTVNVELTYSFRDPFAVEASFRTGNSQPVVVWFARDLLADGLTEATGD  
GDVTVAPIGHGQVELVLTSPSGHARFHADAELSSFLEHTYAAVPEGAEYSWLDFAALTELLDEKARD  
>gi|418459703|ref|ZP\_13030816.1| sporulation and cell division protein, SsgA [*Saccharomonospora azurea* SZMC 14600]  
MRNEHVTLRSTAVFDLLAPRTPPVVKVELRYDTRDPYAVVAAFRTGRAGWVEWVFARDLLADGLLGEAG  
DGDVRLKPSIEDPDSVFVELNSPSGHAMFEASAQELADFLDQTYDVVLPGNEHLWVDVDDALTRLIPHDL  
G  
>gi|257055521|ref|YP\_003133353.1| sporulation and cell division protein, SsgA [*Saccharomonospora viridis* DSM 43017] (Svir\_14890)  
MRNDHVTLRSTAVFDLLAPRTPPVVKVELRYDTRDPYAVVAAFRTGRAGWVEWVFARDL  
LSDGLLGEAGGDVIRPSMEDPDSVFVELNSPSGHAMFEASAQELADFLDQTYDVVLPG

NEHLWVDVDDALTRLIPHDLG  
>gi|134098535|ref|YP\_001104196.1| regulator [Saccharopolyspora erythraea NRRL 2338] (SACE\_1961)  
MRNDHVTLRSTAVFDLLAPQTPAVPVQVELRYDTRDPYAVVAAFRTGRAGWVEWVFARDL  
LADGLIAHAGVGDVTIRPAVDDPEVVVIELSSPSGHAVFEASAQELADFLDRTYDVVVPG  
NENLWVNVDDALTRLLPHDLS  
>gi|348170571|ref|ZP\_08877465.1| regulator [Saccharopolyspora spinosa NRRL 18395]  
MTLRSTAVFDLLAPQTPAVPVQVELRYDTRDPYAVVAAFRTGRAGWVEWVFARDLLADGLIAHAGEGDVT  
IRPAVDAPEVVVAIELSSPSGHAVFEASAQELADFLDRTYDVVVPGNENLWVDVDEALTRLLPHDLG  
>gi|433604679|ref|YP\_007037048.1| Sporulation and cell division protein [Saccharothrix espanaensis DSM 44229]  
MRNDHVTLRSTAVFDLLAPRTPAVPVQVELRYDTKDPYAVVAAFRTGRAGWVEWVYARDLLADGLIADAG  
DGDVIRIRPAADDPEVVVIELSSPSGHAMFEASAQELADFLDRTYDVVVPGNEHLWVDVDEALTHLISNDL  
T  
>gi|159037194|ref|YP\_001536447.1| sporulation and cell division protein SsgA [Salinispora arenicola CNS-205] Sare\_1560  
MSVIRPTTVEVETSLRLVAPDATAALPVRASLRYPADPYAVHVLFAESAGGEAVSWSFARELLVTGLDE  
PAGIGDVRVWPWATPRGDFVALALSSPDGNALFEVPRSVLVRFLRRTYVVVARGREAHLVDVDTAVSRL  
AGR  
>gi|145594147|ref|YP\_001158444.1| unnamed protein product [Salinispora tropica CNB-440] (Strop1600)  
MSVIRPTTVEVETSLRLVAPDATAALPVRASLRYPADPYAVHVLFAESAGGEAVSWSFA  
RELLVTGLDEPAGIGDVRVWPWATPRGDFVALALSSPDGNALFEVPRSVLVRFLRRTYVV  
VARGREAHLVDVDTAVNRLLAGR  
>gi|291300584|ref|YP\_003511862.1| sporulation and cell division protein SsgA [Stackebrandtia nassauensis DSM 44728] (Snas\_3098)  
mattrpatvevdttmrfvatdfttvnvrasmrydaddpyaihvmfhgpnpdqevswsfa  
rellaaglveptgmgdvrwpwstprgdaialalsspdgnalfevsrslvsrflrrsyal  
vpkgkegdsldmdatvaklladr  
>gi|21220041|ref|NP\_625820.1| regulator [Streptomyces coelicolor A3(2)] (SCO1541)  
MNTTVSCELHLRLVVSSESSLVPVAGLRYDTADPYAVH  
ATFHTGAEETVEWVFARDLLAEGHRPTGTGDVVRVWPSRSHGQGVVCIALSSPEGEALLE  
APARALESFLLKRTDAAVPPGTEHRHFDDLDQELSHILAES  
>gi|345854610|ref|ZP\_08807425.1| regulator [Streptomyces zinciresistens K42]  
MNTTVSCELHLRLVVSSESSLVPVAGLRYDTADPYAVHATFHTGAEETVEWVFARDLLAEGHRPTGTGD  
VRVWPSRSHGQGVVCIALSSPEGEALLEAPARALESFLLKRTDAAVPPGTEHRHFDDLDQELSHILAES  
>gi|302527908|ref|ZP\_07280250.1| regulator [Streptomyces sp. AA4]  
MRNDHVTLRSTAVFDLLAPRTPAVPVKVELRYDTRDPYAVVAAFRTGRAGWVEWVYARDLLADGLLADAG  
DGDVIRIRPSVEDPESVLIELNSPSGHAMFEASAQELADFLDRTYDVVPLPGNEHLWVDVDDALTHLIPNDL  
A  
>gi|271967422|ref|YP\_003341618.1| unnamed protein product [Streptosporangium roseum DSM 43021] (Sros\_6145)  
mnsatvsaelglrlvvpdrttvpllaglsytaddpyairmafhvgndepvewifarellt  
vgivrrvgdgvqvwparadgertlhisltspfgqalfevplaplteflhrtyelvpagr  
etdfmdldaelsnmlwss  
>gi|72162510|ref|YP\_290167.1| unnamed protein product [Thermobifida fusca YX] (Tfus\_2111)  
MSSSGTSITCEVGLQLIVPDRAPVPLVARLDYSVDDPYAIRAAFHVGDDEPV  
EWIFARELLTVGIIRETGEDVRIWPSQDGKERMVNIALSSPFGQARFHAQV  
APLSEFLHRTYELVPAGQESDYIDIDAEIAEHL  
>gi|296270068|ref|YP\_003652700.1| sporulation and cell division protein SsgA [Thermobispora bispora DSM 43833] (This\_2095)  
mnsitvsaelglrlvvpdrttipltasltyatdpairmafhvgndepvewifarellt  
igmvrrvgegdvqvwpartegeqslnisltspfgqalfevplaplaflnrtyelvpagr  
esdfmdldqelsnmlwss

>gi|269126283|ref|YP\_003299653.1| sporulation and cell division protein  
SsgA [Thermomonospora curvata DSM 43183] (Tcur\_2048)  
mdssrtisaelglrlvvpdrttvpllaeveyatddpyairmsfyvgndepvewifarell  
tvgivrrvvgdgdvqvwpaepggdrivhialsspfgdalfevplpplaeflhrtyravpag  
reaefidmeaelenllwps  
>gi|330466623|ref|YP\_004404366.1| sporulation and cell division protein  
ssga [Verrucospora maris AB-18-032] VAB18032\_13260  
MSVIRPTTVEVETSLRLVAPDATALPVRASLRYPADPYAVHVLFFHAESAGGEAVSWSFARELLVTGLDE  
PAGIGDVRVWPWATPRGDFVALALSSPDGNALFEVPRSVLVRFLRRTYVVVPRGREAEHLDVDTAVNRL  
AGR

#### Supplemental Data file 4. SsgA protein sequences.

>gi|395772008|ref|ZP\_10452523.1| regulator [Streptomyces acidiscabies 84-104]  
MNFLVSEELSFRIPVGLLEYEPDDPYAVRLTFHLPDAPVTWTFGRELLIDGVGRPCGEGDVRVAPTDPE  
LGEVLIRLQVGADQAVFRSSAAPLIAFLDRTDRVVPLGQEGSFADFDAHLDEALGRILAEEQSAG

>gi|11066161|gb|AAG28482.1|AF195771\_1 SsgA [Streptomyces albus]  
MSFLVSEELAFRIPVELRYETVDPYAVRLTFHLPDAPVTWVFGRELLVEGVLDAAAGDGDVRCVPGQTA  
TREVHITLQVGSEQUALFRVKGAPLLAFLDRTDQGLSLGSERAHADFDLDDALNRSLAEEQSAG

>gi|291452710|ref|ZP\_06592100.1| SsgA [Streptomyces albus J1074]  
MSFLVSEELAFRIPVELRYETVDPYAVRLTFHLPDAPVTWVFGRELLVEGVLDAAAGDGDVRCVPGQTA  
TREVHITLQVGSEQUALFRVKGAPLLAFLDRTDRLVPLGSERAHADFDLDDALNRSLAEEQSAG

>gi|398784277|ref|ZP\_10547541.1| SsgA protein [Streptomyces auratus AGR0001]  
MSFVVSDELAFRIPVELDFASADPFVAVRLTFDLPGDAPVTWAFGRELLDGLSRPSGEGDVRIEPA  
EHLSDVFIQLQVGSERALFRVSAAPLVAFLDRTDRLVPLGKEEVCDTLEAVLDRILTEAPAG

>gi|29830810|ref|NP\_825444.1| cell division protein, regulatory protein [Streptomyces avermitilis MA-4680]  
MSFLVSEELSFRIPVELRYETCDPFVAVQLTFHLPDAPVTWTFGRELLIDGVGRPCGDDVHIAPADREA  
FGEVLIRLQVGGDHAFRSGAVPLVTFDRTDKLVPLGQECSLADFDAHLDEALDRILAEEQSAG

>gi|374988085|ref|YP\_004963580.1| SsgA protein [Streptomyces bingchengensis BCW-1]  
MTFLVSQDLSFRIPVELSYDSSDPYAVEITFHLPGDAPVSWAFARELLDGLSKPSGEGDVRIAPASPEG  
LSDVFIQLQVGAERALFRAGAAPLVAFLDRTDRVVPFGQEQAACDPVGDLDLAEALDRILAEEDRYAG

>gi|418467927|ref|ZP\_13038780.1| regulator [Streptomyces coelicoflavus ZG0656]  
MSFLVSEELSFRIPVELRYETRDPYAVRLTFHLPDAPVTWAFGRELLVDGVGRPCGDDG  
VRIAPVDPEPLAEVLIRLQVGSQALFRSSAAPLVAFLDRTDKLVPLGQEGALADFDLDEALDRILAE  
EQSAG

>gi|21222332|ref|NP\_628111.1| regulator [Streptomyces coelicolor A3(2)]  
MSFLVSEELSFRIPVELRYETRDPYAVRLTFHLPDAPVTWAFGRELLVDGVGRPCGDDVRIAPVEPE  
PLAEVLIRLQVGSQALFRSSAAPLVAFLDRTDKLVPLGQEGALADFDLDEALDRILAEEQSAG

>gi|185534933|gb|ACC77835.1| SsgA [Streptomyces clavuligerus]  
MNFLVSEELSFRIPVELRYETDDPYAVRMTFHLPGDAPVTWAFSRDLLVGGVTGPTGDG  
DVHIAPTGPGRADLGIQLQVQERAYFVVGAPPVVAFLDRTDRLVPLGQERAYGNACAGDLDSALCGILA  
EEQNAG

>gi|185534923|gb|ACC77830.1| SsgA [Streptomyces collinus]  
MSFLVSEELSFRIPVELRYESSDPYAVRLTFHLPDAPVTWAFGRELLIDGVGRPCGEGD  
VRVTPVEPDALGEVLIRLQVGSQALFRSSTAPLVAFLDRTDKLVPLGQEGSLADFDAHLDEALDRILAE  
QGAG

>gi|408530778|emb|CCK28952.1| hypothetical protein BN159\_4573 [Streptomyces davawensis JCM 4913]  
MSFLVSEELSFRIPVELRYATSDPYAVRLTFHLPDAPVTWAFGRELLIDGVGRACGEGD  
VRVSPADPETLGDVIRLQVGGDHAFRSSSAPLIAFLDRTDKLVPLGQEGALSDFDASLDEALDRILAE  
EQSAG

>gi|185534927|gb|ACC77832.1| SsgA [Streptomyces diastatochromogenes]  
MSFLVSEELSFRIPVELRYETCDPYAVRLTFHLPDAPVTWAFGRELLIDGVGRPCGEGD  
VHIAPVDAEVLGEVLIRLQVGGDHAFRSTPPLVAFLDRTDKLVPLGQEGALADFDAHLDEALDRILAE  
EQNAG

>gi|185534919|gb|ACC77828.1| SsgA [Streptomyces filamentosus]  
MSFLVSEELSFRIPVELRYEVDGDPYAIRMTFHLPGDAPVTWAFGRELLDGLNSPSGDDG  
VHIGPTEPEGLGDVHIRLQVGDALFRAGTAPLVAFLDRTDKLVPLGQEHTLGDGDFDGNLEALGRILAE  
EQNAG

>gi|185534929|gb|ACC77833.1| SsgA [Streptomyces filipinensis]  
MSFLVSEELSFRIPVELRYETCDPYAVRLTFHLPDAPVTWAFGRELLIDGVGRPCGEGD  
VHIAPADSEVLGEVLIRLQVGGCDQALFRASSTPPLVAFLDRTDKLVPLGQEGALADFDAHLEALDRILAE  
EQSAG

>gi|357412337|ref|YP\_004924073.1| sporulation and cell division protein SsgA [*Streptomyces flavogriseus* ATCC 33331]  
MSFLVSEELSFRIPVELRYEVSDDPYAIRMTFHLPGDAPVTWAFGRELLLDGLNSPSGDDVHIGPIEPEG  
LSDVHIRLQVGADRALFRAGTAPLVAFLDRTDKLVPLGQEHTLGDFDGNLEELALGRILAKEQNAG

>gi|185534925|gb|ACC77831.1| SsgA [*Streptomyces fradiae*]  
MSFLVSEELSFRIPVELGYETCDPYAVRLTFHLPGDAPVTWAFGRELLVDGVGRPCGDDG  
VRIAPVDPEPLAEVLIRLQVGTQALFRSSAAPLVAFLDRTDKLVPLGQEGALADFDAHLDEALDRILAE  
EQNAG

>gi|291438568|ref|ZP\_06577958.1| regulatory protein [*Streptomyces ghanaensis* ATCC 14672]  
MSFLVSEELSFRIPVELRYDTCDPYAVRLTFHLPGDAPVTWAFGRELLVDGVGRPCGEGDVRVSPVDPD  
TLGEVLIRLQVGSQALFRSSTAPLVAFLDRTDKLVPLGQEGALADFDAHLDDALDRILAEQAG

>gi|411003756|ref|ZP\_11380085.1| SsgA protein [*Streptomyces globisporus* C-1027]  
MSFLVSEELSFRIPVELRYEVDGDPYAVRMTFHLPGDAPVTWAFGRELLLDGLNSPSGDDVHIGPTEPEG  
LGDVHIRLQVGADRALFRAGTAPLVAFLDRTDKLVPLGQEHTLGDFDGNLEEDALGRILAEEQNAG

>gi|11066159|gb|AAG28481.1|AF195770\_1 SsgA [*Streptomyces goldeniensis*]  
MSFLVSEELSFRIPVELRYETCDPYAVRLTFHLPGDAPVTWAFGRELLIDGGPRPCGDDVHIAPADPET  
FGEVLIRLQVGSQAMFRVGTAPLVAFLDRTDKIVPLGQERSLADFDALLDEALDRILAEEQNAG

>gi|185534935|gb|ACC77836.1| SsgA [*Streptomyces granaticolor*]  
MSFLVSEELSFKIPVELRYETRDYAVRMTFHLPGDAPVTWAFGRELLLDGINRPSGDDG  
VHIAPTDPERLSDVSIQLQVGGDRALFRASAPPLVAFLDRTDKLVPLGQERTLGDFEDHLEAALGRILAE  
ENAGPA

>gi|302559712|ref|ZP\_07312054.1| conserved hypothetical protein [*Streptomyces griseoflavus* Tu4000]  
MSFLVSEELSFRIPVELRYDTCDPYAVRLTFHLPGDAPVTWAFGRELLIDGVGRPCGEGD  
VRVSPLDPEALGEVLIRLQVGGDQALFRSSTAPLVAFLDRTDKLVPLGQEGALADFDAHLDDALDRILAE  
QSAG

>gi|182437448|ref|YP\_001825167.1| SsgA protein [*Streptomyces griseus* subsp. *griseus* NBRC 13350]  
MSFLVSEELSFRIPVELRYEVDGDPYAIRMTFHLPGDAPVTWAFGRELLLDGLNSPSGDDVHIGPTEPE  
GLGDVHIRLQVGADRALFRAGTAPLVAFLDRTDKLVPLGQEHTLGDFDGNLEEDALGRILAEEQNAG

>gi|326778104|ref|ZP\_08237369.1| sporulation and cell division protein SsgA [*Streptomyces griseus* XylebKG-1]  
MSFLVSEELSFRIPVELRYEVDGDPYAIRMTFHLPGDAPVTWAFGRELLLDGLNSPSGDDVHIGPTEPEG  
LGDVHIRLQVGADRALFRAGTAPLVAFLDRTDKLVPLGQEHTLGDFDGNLEEDALGRILAEEQNAG

>gi|329938685|ref|ZP\_08288081.1| SsgA-like sporulation/cell division regulator [*Streptomyces griseoaurantiacus* M045]  
MSFLVSEELSFRIPVELRYETCDPFVAVRLTFHLPGDAPVTWAFGRELLVDGVGRPCGDDVHIA  
PADPHAIGEVLIRLQVGADRAVFKSGAAPLVAFLDRTDKLVPLGQERSLADFDLLEALDRILAEEQSA  
G

>gi|386841227|ref|YP\_006246285.1| regulator [*Streptomyces hygrosopicus* subsp. *jinggangensis* 5008]  
MSFLVSEELSFRIPVELRYETCDPYAVRLTFHLPGDAPVTWAFGRELLIDGVGRPCGEGD  
VHIAPADSEVLGEVLIRLQVGGDQALFRSSAPPLVAFLDRTDKLVPLGQEGALADFDAHLDEALDRILAE  
EQSAG

>gi|429201636|ref|ZP\_19193088.1| hypothetical protein STRIP9103\_04759 [*Streptomyces ipomoeae* 91-03]  
MSFLVSEELSFRIPVELRYETCDPYAVRLTFHLPGDAPVTWAFGRELLIDGVGRPCGDDG  
VHITPADPETFGEVLIRLQVGTQALFRVGTAPLVAFLDRTDKLVPLGQERSLADFDLLEALDRILAE  
EQSAG

>lividans\_TK24  
MSFLVSEELSFRIPVELRYETRDYAVRLTFHLPGDAPVTWAFGRELLVDGVGRPCGDDG  
VRIAPVEPEPLAEVLIRLQVGSQALFRSSAAPLVAFLDRTDKLVPLGQEGALADFDLDEALDRILAE  
EQSAG

>gi|11066163|gb|AAG28483.1|AF195772\_1 SsgA [*Streptomyces netropsis*]  
MSFLVSEELSFKIPVELRYETRDYAVRMTFHLPGDAPVTWAFGRELLLDGINRPSGDDG  
VHIAPTDPGLSDVSIQLQVGGADRALFRAGAPPLVAFLDRTDKSVPLGQEQLGDFEDSLEAALGKILAE

EQNAG  
>gi|297193350|ref|ZP\_06910748.1| SsgA protein [Streptomyces  
pristinaespiralis ATCC 25486]  
MRFLVSEELSFRI PVGLDYETGDPYAVRMTFHLPGDAPVTWAFGRELLLDGINGPSGDG  
DVHIAPVGPESLSV IIRLVGGDSAMFRAGAAPLVAFLDRTDKLLPMGQELTLGDFELSL E EALGRILA  
EENAG  
>gi|185534931|gb|ACC77834.1| SsgA [Streptomyces ramocissimus]  
MSFLVSKELSFRI PVELSYEAADPYAVRLTFHLPGDAPVTWAFGRELLIDGVGRPCG  
AGDVRVEPTDPTLGEVLISLQVGTDQALFRVSTAPLVAFLDRTDKLVPLGQEGAFSDFDTHLDQALGRI  
LAEEQSAG  
>gi|441142623|ref|ZP\_20962491.1| SsgA protein [Streptomyces rimosus  
subsp. rimosus ATCC 10970]  
MSFLVSEELAFRI PVELFFDSADPYAVSFTFDLPGDAPVTWAFSRELLLDGLSKPSGEGDVRIGPASSEH  
LSDVFIGLQVGDERALFRAGAPPLVAFLDRTDRLVPIGEEVCDTLDSTLDRILSEAQKAG  
>gi|239989179|ref|ZP\_04709843.1| SsgA protein [Streptomyces roseosporus  
NRRL 11379]  
MSFLVSEELSFRI PVELRYEVDGDPYAIRMTFHLPGDAPVTWAFGRELLLDGLNSPSGDGDVHIGPTEPE  
GLGDVHIRLQVGADRALFRAGTAPLVAFLDRTDKLVPLGQEHTLGDFDGNLEDALGRILAE EQNAG  
>gi|291446185|ref|ZP\_06585575.1| ssgA [Streptomyces roseosporus NRRL  
15998]  
MSFLVSEELSFRI PVELRYEVDGDPYAIRMTFHLPGDAPVTWAFGRELLLDGLNSPSGDGDVHIGPTEPE  
GLGDVHIRLQVGADRALFRAGTAPLVAFLDRTDKLVPLGQEHTLGDFDGNLEDALGRILAE EQNAG  
>gi|290959050|ref|YP\_003490232.1| unnamed protein product [Streptomyces  
scabiei 87.22]  
MSFLVSEELSFRI PVELRYETCDPYAVRLTFHLPGDAPVTWAFGRELLIDGVGRPCGDGD  
VHIAPADPETFGV E LIRLQVGT DQAMFRVGTAPLVAFLDRTDKLVPLGQERSLADFD TLLDEALDRILAE  
EQSAG  
>gi|408825596|ref|ZP\_11210486.1| sporulation and cell division protein  
SsgA [Streptomyces somaliensis DSM 40738]  
MSFIVSEELSFRI PVELGYETRDPFAVRMTFHLPGDAPVTWTFGRELLVDGINDATGDGDVRIE PSETEE  
LSDVHIRLQVGADQALFRASAPPLVAFLDRTDKLVPLGQEC SLGDFDEGLDEV LGRILADENAG  
>gi|302535619|ref|ZP\_07287961.1| SsgA protein [Streptomyces sp. C]  
MSFLVSEELAFRI PVELRYEARDPYAVRLTFHLPGDAPVTWAFGRELLLDGINKPSGDGD  
VHIAPTDPDELSDVHIRLQVGGDRALFRAGAGPLVAFLDRTDRLVPLGQERNLGDFF EESLDQALGRILSE  
SQHDERKAG  
>gi|185534943|gb|ACC77840.1| SsgA [Streptomyces sp. Che26]  
MSFLVSEELSFRI PVELRYEVDGDPYAIRMTFHLPGDAPVTWAFGRELLLDGLNSPSGDGD  
VHIGPTEPEGLGDVHIRLQVGADRALFRAGTAPLVAFLDRTDKLVPLGQEHTLGDFDGNLEDALGRILAE  
EQNAG  
>gi|294630283|ref|ZP\_06708843.1| regulatory protein [Streptomyces sp.  
e14]  
MSFLVSEELSFRI PVELRYETCDPYAVRLTFHLPGDAPVTWAFGRELLIDGVGAPCGDGD  
VRISPADSDSLSEVLIRLQVGPDRALFRSSTAPLVAFLDRTDKLVPLGQEGALADFDAHLDEALDRILAE  
EQSAG  
>gi|185534941|gb|ACC77839.1| SsgA [Streptomyces sp. Gre54]  
MSFLVSEELSFRI PVELRYEVS DPYAIRMTFHLPGDAPVTWAFGRELLLDGLNSPSGDGD  
VHIGPTEPEGLSDVHIRLQVGADRALFRAGTAPLVAFLDRTDKLVPLGQEHTLGDFDGNLE EALGRILAK  
EQNAG  
>gi|254384822|ref|ZP\_05000159.1| SsgA [Streptomyces sp. Mg1]  
MSFLVSEELAFRI PVELGYEARDPYAVRLTFHLPGDAPVTWAFGRELLLDGINKPCGDGDVHIAPTSPEG  
LSDVHIRLQVGC DRALFRASAAPLVAFLDRTDRLVPLGQERNLGDFF EESLDEALCKILAQSRQNEQ NAG  
>gi|302520469|ref|ZP\_07272811.1| regulator [Streptomyces sp. SPB78]  
MSFLVSEELSFRI PVELRYEAADPYAVRLTFHLPGDAPVSWTFGRELLADGIDEACGDGD  
VRVPVEPEPLLDGEGGELHIRLQVGT DQALFRVGM APIVAFLDRTDRLVPLGEERACAD FESHLD DAL  
HRILAE EPSAG  
>gi|359150781|ref|ZP\_09183584.1| regulator [Streptomyces sp. S4]  
MSFLVSEELAFRI PVELRYETVDPYAVRLTFHLPGDAPVTWVFGRELLVEGV L DAAGDGDV R VCPV GQT  
ATRE VHITLQV GSEQALFRAGKAPLLAFLDRTDRLVPLG SERAHAD FDSHLDDALNRILAE EQSAG

>gi|318075542|ref|ZP\_07982874.1| SsgA-like sporulation/cell division regulator [Streptomyces sp. SA3\_actF]  
MSFLVSEELSFRIIPVELRYEAADPYAVRLTFHLPDAPVSWTFGRELLADGIDEACGDGD  
VRVSPVEPEPLLDGEGPGELHIRLQVGTQALFRVGMPIVAFDRLDRLVPLGEERACADFESHLDLAL  
HRILAEEPSAG

>gi|318059016|ref|ZP\_07977739.1| SsgA-like sporulation/cell division regulator [Streptomyces sp. SA3\_actG]  
MSFLVSEELSFRIIPVELRYEAADPYAVRLTFHLPDAPVSWTFGRELLADGIDEACGDGD  
VRVSPVEPEPLLDGEGPGELHIRLQVGTQALFRVGMPIVAFDRLDRLVPLGEERACADFESHLDLAL  
HRILAEEPSAG

>gi|345000910|ref|YP\_004803764.1| sporulation and cell division protein SsgA [Streptomyces sp. SirexAA-E]  
MSFLVSEELSFRIIPVELRYEVSADPYAIRMTFHLPGDAPVTWAFGRELLDGLNSPSGDGDVHIAPTEPEG  
LSDVHIRLQVGADRALFRAGTAPLVAFLDRTDKLVPLGQEHTLGDFDGSLEEALGRILAKEQNAG

>gi|421740505|ref|ZP\_16178755.1| sporulation and cell division protein, SsgA [Streptomyces sp. SM8]  
MSFLVSEELAFRIIPVELRYETVDPYAVRLTFHLPDAPVTWVFGRELLVEGVLDAAAGDGD  
VRVCPVGTATREHVHITLQVGSEQALFRAGKAPLLAFDRLDRLVPLGSERAHADFDLHLDLALNRILAE  
EQSAG

>gi|295837801|ref|ZP\_06824734.1| regulator [Streptomyces sp. SPB74]  
MSFLVSEELSFRIIPVELRYEAADPYAVRLTFHLPDAPVSWTFGRELLADGIDEACGDGD  
VRVSPVEPEPLLDGEGPGELHIRLQVGTQALFRVGMPIVAFDRLDRLVPLGEERACADFESHLDLAL  
HRILAEEPSAG

>gi|333025765|ref|ZP\_08453829.1| putative regulator [Streptomyces sp. Tu6071]  
MSFLVSEELSFRIIPVELRYEAADPYAVRLTFHLPDAPVSWTFGRELLADGIDEACGDGD  
VRVSPVEPEPLLDGEGPGELHIRLQVGTQALFRVGMPIVAFDRLDRLVPLGEERACADFESHLDLAL  
HRILAEEPSAG

>gi|365864743|ref|ZP\_09404422.1| SsgA protein [Streptomyces sp. W007]  
MSFLVSEELSFRIIPVELRYEVGDPYAIRMTFHLPGDAPVTWAFGRELLDGLNSPSGDGDVHIGPTEPE  
GLGDVHIRLQVGADRALFRAGTAPLVAFLDRTDKLVPLGQEHTLGDFDGNLEDALGRILAEQNAQ

>gi|185534939|gb|ACC77838.1| SsgA [Streptomyces sp. Wlb 19]  
MSFLVSEELSFRIIPVELRYEVGDPYAIRMTFHLPGDAPVTWAFGRELLDGLNSPSGDGD  
VHIGPTEPEGLGDVHIRLQVGADRALFRAGTAPLVAFLDRTDKLVPLGQEHTLGDFDGNLEDALGRILAE  
EQNAQ

>gi|297200889|ref|ZP\_06918286.1| regulator [Streptomyces sviveus ATCC 29083]  
MSFLVSEELSFRIIPVELRYEACDPYAVRLTFHLPDAPVTWAFGRELLIDGVGRPCGEGD  
VRVSPAGSDLLGDVLRQLQVGGDQALFRSSTAPIIAFLDRTDKLVPLGQEAALADFDLHLDLALDRILAE  
EQSAG

>gi|440694368|ref|ZP\_20876991.1| hypothetical protein STRTUCAR8\_05666 [Streptomyces turgidiscabies Car8]  
MSFLVSEELSFRIIPVELRYETCDPYAVRLTFHLPDAPVTWAFGRELLIDGVGRPCGEGD  
VRIAPADTDVLGEVLIRLQVGGDQALFRSGAAPLVAFLDRTDKLVPLGQERSLADFDLHLDLALDRILAE  
EQSAG

>gi|185534937|gb|ACC77837.1| SsgA [Streptomyces venezuelae]  
MSFLVSEELCFKIPVELRYETRDYAVRMTFHLPGDAPVTWAFGRELLDGINRPSGDG  
DVHIAPTDPEGLSDVSIRLQVGGDRALFRASAPPLVAFLDRTDKLVPLGQERTLGDFEDNLEAALGRILA  
EEQSAG

>gi|328883752|emb|CCA56991.1| putative regulator [Streptomyces venezuelae ATCC 10712]  
MSFLVSEELSFKIPVELRYETRDYAVRMTFHLPGDAPVTWAFGRELLDGINRPSGDGDVHIAPTDPEG  
LSDVSIRLQVGGDRALFRASAPPLVAFLDRTDKLVPLGQERTLGDFEDNLEAALGRILAEESAGPTA

>gi|345016399|ref|YP\_004818753.1| sporulation and cell division protein SsgA [Streptomyces violaceusniger Tu 4113]  
MTFLVSQDLSFRIIPVELSYDSSDPYAVEITFHLPGDAPVSWAFARELLDGLSRPTGEGDVRIAPASPEG  
LSDVFIIRLQVGCERALFRAGAAPLVAFLDRTDRVVPFGQEPACDPVGDLDLAEELHRIILAEEDRFAG

>gi|302552643|ref|ZP\_07304985.1| conserved hypothetical protein  
[*Streptomyces viridochromogenes* DSM 40736]  
MSFLVSDLSFRIPVELRYETSDPYAVRLTFHLPGDAPVTWAFGRELLIDGVGRPCGEGD  
VRVTPVEADSLGEVLIRLQVGSQAVFRSSTAPLVAFLDRTDKLVPLGQEGSLADFDAHLDEALDRILAE  
QGAG

>gi|443626097|ref|ZP\_21110527.1| putative SsgA-like sporulation/cell  
division regulator [*Streptomyces viridochromogenes* Tue57]  
MSFLVSEELSFRIIPVELRYETCDPYAVRLTFHLPGDAPVTWAFGRELLVDGVGRPCGEGD  
VRVSPAGADTLGDVLRILQVQADQALFRSSVAPLVAFLDRTDKLVPLGQEGALADFDAHLDEALDRILAE  
EQSAG

>gi|345849305|ref|ZP\_08802318.1| SsgA-like sporulation/cell division  
regulator [*Streptomyces zinciresistens* K42]  
MSFLVSEELSFRIIPVELRYETCDPYAVRLTFHLPGDAPVTWAFGRELLVDGVGGPCGEGD  
VRVSPAGAETLGDVLRILQVQADQALFRSSVAPLVAFLDRTDKLVPLGQEGALADFDTHLDEALDRILAE  
EQSAG



## Supplemental Data file 5. SALP protein sequences from actinomycetes.

>Streptomyces\_coelicolor\_SsgA (SCO3926)  
MSFLVSEELSFRIPELVETRDYPYAVRLTFHLPDAPVTWAFGRELLV  
DGVGRPCGDGDVRIAPVEPEPLAEVLIRLQVGSQALFRSSAAPLVAFLDRTDKLVPLGQ  
EGALADFDLDEALDRILAEEQSAG\*

>Streptomyces\_coelicolor\_SsgB (SCO1541)  
MNTTVSCELHLRLVVSSESSLVPAGLRYDTADPYAVHATFHTGAEETVEWVFARDLLAE  
GLHRPTGTGDVRVWPSRSHGQGVVCIALLSSPEGEALLEAPARALESFLLKRTDAVPPGTE  
HRHFDLDQELSHILAE\*

>Streptomyces\_coelicolor\_SsgC (SCO7289)  
VNTVVHKTLLVQVQAGGTADRFPVLAHLAYDAADPFALTVVVSHDGRVLRWTLDREMVA  
EGLTRPVGVGDVRLRPESRGMWDELRIELLDGRADGERHRAVVFVWAAAVEAFLRETHA  
VVRPGREEVRVDDFLAELTAEG\*

>Streptomyces\_coelicolor\_SsgD (SCO6722)  
LSTVIEQSVEARLVAAAPRMPSPATLHYDRADPFVAVRMTFPAPATLEGVEVCWTFSSREL  
LIAGMQEPNGHGDVVRVPYAYDRTVLEFHAPEGTAVIHVRSSELRRFLQAAGELVPVGL  
HLQLDLHDHLAELMRGSC\*

>Streptomyces\_coelicolor\_SsgE (SCO3158)  
MSVVEQYARAHILTDGLDPQDDGGAIPVVLRYDPQLDPSKVCVALPGRGGRASGSREW  
FSRELLEQGLRAPAGSGEVRVWPCGRVQAVVEFHSPQGCSSVVQFENKALIRFLRRTYAAT  
AQPVAH\*

>Streptomyces\_coelicolor\_SsgF (SCO7175)  
MSGDHHGVQAQHSAAQALLPLSLCLSQMTGALEWEDVPAEFYRDPDHPLLVTIRFAPEGA  
PPVTWHVGRDLLHEGLRTTSGLDVQVWADTPTDRETAWLQVNAHGDI AIFSLPVPELEE  
WIDRTYLHVPAGTESSRLGTDAFLSKLFDPEASSR\*

>Streptomyces\_coelicolor\_SsgG (SCO2924)  
MHTNPTGPTVVERELELRLVLSPESGIPVPARLGYHTDDPYAVHITFHIDSGHPVHWTFA  
RDLLEVEGVFRPSGHGDVVRVWPSKTEGRSVVLVALSSPDGDALLEAPTPQVSAWLERTLRA  
VPPGTEGAQLGIDDGLAELLAR\*

>Acidothermus\_cellulolyticus\_11B\_Acel\_1369  
MNASVHIIIEVTEFHLLLDGDSRVITARLHYDPADPYVITVHFDTGVTWVLRDGLLADGLH  
MEIGDGDVHLRPEGDQLFLTLRSPSGEALLAASRSIAIGFMADTERVVPRGTEHLRVDLD  
KELARLLP

>Actinoplanes\_missouriensis\_431\_AMIS\_65300  
MSTIRPTTVEVETSLRLVAPDATAALPVRASLRYDPADPYAVHVLFAESAGGEAVSWSFARELLVTGLDE  
PAGIGDVRVWPWATPRGDFVALALSSPDGNALFEVPRSVLVRFLRRTYVVVPRGRESDDLVDAAVNRL  
AGR

>Actinosynnema\_mirum\_DSM\_43827\_Amir\_2015  
mrndhvtlrststavfdllaprtppavpvqvelrydtkdpyaviaaafrtgragwvewvfardl  
ladgliadagdgdvirpaaddpevvvielsspsghamfeasaqeladfldrtydvvvpg  
nehlwvdvdealthlisndls

>Actinosynnema\_mirum\_DSM\_43827\_Amir\_6524  
MSAESITTTTTFHLLVPGAAPAPVEAEELHYEPEDPYAVAVLFFHTGQKVEWIFARDLLADGLLTPSGEGD  
ILVRPASDDPERVLELNAPTGFALISAIAEHIAEFLDLTYDVVQPGEEDLWIDFDRELAKLVSTN

>Amycolatopsis\_mediterranei\_U32\_AMED\_5330  
mrndhvtlrststavfdllaprtppavpvkvelrydtrdpyavvaafrtgragwvewvyardl  
ladglladagdgdvirpsvedpeavlielnspsghamfeasaqeladfldrtydvvlpg  
nehlwvdvddalthliphdla

>Amycolatopsis\_mediterranei\_U32\_AMED\_0264  
MHTDAVHQSQFVLLNESTTPVLSRSLSYHAHEPFAVTVAFRTERGRWIEWTFARDLLVAGLDEPAGLDV  
IRPDLSDDEDFTLEIESPDGYASFELEVEDVRTFLDASTELVPLGEE SAHFVDVGLIEEISNV

>Amycolatopsis\_mediterranei\_U32\_AMED\_0370  
MELIYPADAVVNGRGPVPVALLYDPADPWAVTLLIAGHEWLFARELLATGLSEPA GDGVVVRPDIGGT  
GHVLLTLTAPAGCADVALPRGTVESLLDAAEALVPRGCEGIDWDREWARLANGPAA

>Amycolatopsis\_mediterranei\_U32\_AMED\_6168

MELIYPADAVVNGRGPVVALLYDPADPWAITLLIAGHEWLFARELLATGLSEPAGDGDVVRPDTGGTF  
GHLTLTTPAGCADVALPRGTVESLLAAAEALVPRGCEGIDWDSEWARLANGPAA  
>Amycolatopsis\_mediterranei\_U32\_AMED\_7500  
MADPNTVITARIDFALRTFGAGPRPVAELEYDTLDPYAVAVVLHAGPSAVRWLFGDRLLADGLLARCGD  
GDVIRIGPAGDPALVLEVELSSPDGAAVLEAPAKEIAAFLDRTYDVIPAGSESDWFDDEELAKLSYQD  
>Blastococcus\_saxobsidens\_DD2\_BLASA\_2304  
MPGHISPITLQLIGPQSWTEVPALLCYDPADPFVAVRIAFGDPGEQDPADGDEGIAWLVSRELLQAGLEHP  
AGDGDVVRVPAHATADVLFHLRAPSGEALFELSRTVA AFLRHTEALVPTGSETGLLHLDQELDALLSN  
GGPDAPGR  
>Catenulispora\_acidiphila\_DSM\_44928\_Caci\_2217  
msssvtcelqlrlvisgdsslpvpaglrydtadpyavhatfhtggqdtvdwvfarellae  
glrrptgtgdvrwpsrsgqaiivclalsspegealleaparalesflkrntavppgle  
hrfyldaelvhlfadn  
>Cellulomonas\_fimi\_ATCC\_484\_Celf\_2043  
MTQSSYDVVEVVAMQLIGSDASVIPVSAELSFRTSDPYTVRAVFTGPHTMSTWLLGRELLSLGMLASADA  
PAGTGDVQVWRDEDPDYTLVSLNGVEGSALLAAPTEPITRFLASTEALVPLGAESARMESEITALIAALL  
TA  
>Frankia\_alni\_ACN14a\_FRAAL2127  
MPVAATVRYEPADPYAISIGFRTGADEVVEWTFARQLLSDGVRRPAGDGDVQVWPAAQSG  
GRIVCLSLSSPSGHALFEMPRSEVLAF LRRTYS AVPLGGESDI IDLDAELALLI WGGPER  
>Frankia\_alni\_ACN14a\_FRAAL5533  
MRDLSADVFTEDEGARASVAGTLRYDPADPFVAVELILRPGRESITWIFARTLLAEGTQSPTGTGDVIRIPT  
RSEGRAVVTVTLSSPSGHADLELPRSIVTRFLAEIEEKVPAGRESEGIDWNAELRTRLLRTRNP  
>Frankia\_alni\_ACN14a\_FRAAL5373  
MSQRRPPVANPFESQMSAFLVQPDGTRAPLPAALRFDRADPFVAVSLRLRTSTVQTVTWTFFARQLLIDGAR  
RPTGVGAVEVRPAFHGDGTRLLVLSLKSASRHTEVQLRHEQVAAFINDTLAAVPSGAESDQVDWNAELNRF  
HDDDS  
>Frankia\_alni\_ACN14a\_FRAAL6494  
MLGRSVRRRSLGRGMTARLMREGRPPRAVRAVFGYDPADPIAVTTLTGGVIGTGPVVWRFARRLLADGAR  
RPVGLGDVVRVPIVLRGQPALALCLCGTSGTAELELPAREVAAFLWRTYAMVSADAEAAATIDWAGEFRFM  
PGRPAGPEGGVAWPSGWVGRRPSRTDGAGDPRVPAEGPW  
>Frankia\_alni\_ACN14a\_FRAAL4594  
MTVFQICWRACDPLAVSMTLVS RPEHPALPQGSWVAPRDALRAGLEATVGDGDVIRIGDPGEGGVRLDLV  
DGDRHSVVVLATASLRSFLDRTERLVPTGEEHTEQELDTVLANLLQT  
>Frankia\_sp\_EAN1pec\_Franean1\_5158  
MTIRHDSITAEALRLVVPGGAPVVAATVRYEPADPYAVSIGFRTGADEVVEWTFARQLLSDGVRRPAG  
DGDVQVWPAAQSGGRIVCLSLSSPSGHALFEMPRAEVLAF LRRTYS AVPLGGESDVIDLDAELALLI WGG  
PER  
>Frankia\_sp\_EAN1pec\_Franean1\_4060  
MRGRPIVSNVATMDVNATYLTGDEAGKRVPVLVTRFDPLDPVAITLRTRVPDQRVLAWTFARELLAGGD  
ERPVGEGTIRIAPVLRERRRLLTVDLPSPGGPVTVELPASRVADFVRRTYERVPAESAVIDLDDLDDL  
GLAALDRG  
>Frankia\_sp\_EAN1pec\_Franean1\_2058  
MQVEDVTTEFVDDAPSRGRITVLQITWRSCDPLAVALVLSRPDHPALPQGHVWVAPRDALRAGLDGPAP  
VGDGDVIRITPEPTRDGIRLELADGERRSVVLDAAVRRFLERTERVVPAGEEHPEVALDAVLDDLQTT  
>Frankia\_sp\_CcI3\_Francci3\_1359  
MTIRHDSITAEALRLVVPGGAPVVAATVRYEPADPYAISIGFRTGADEVVEWTFARQLLSDGVRRPAG  
DGDVQVWPAAQSGGRIVCLSLSSPSGHALFEMPRSEVLAF LRRTYS AVPLGGESDI IDLDAELALLI WGG  
PER  
>Frankia\_sp\_CcI3\_Francci3\_3418  
MLRHSSTPAHVVARLDVSDYVTEEGEREAI PGTLRYDPADPFVAVELILRPGEEAITWIFARALLAEGIEV  
PAGTGDVIRIPTRSKGQTVITVSLSSPSGHADLELAKSKVTAFLADCHGQVPAGRESNGIDWNNELHMLL  
RTRNT  
>Frankia\_sp\_CcI3\_Francci3\_1632  
MLGKDVTAEFVDDASSRGRITVFQICWGARDPLAVSMTLVS RPEHPALPQGSWVAPRDLRAGLETAVG  
DGDVIRIGPDADRRGVRLDLVHGDRQSVVVAASSLRSFLDRTERLVPTGQEHTEQELDAVLADLLRT  
>Frankia\_QA3\_FraQA3DRAFT\_0319  
MLGKDVTAEFVDDAASGRVTVFQICWRACDPLAVSMTLVS RPEHPALPQGSWVAPRDALRAGLETAVG

DGDVIRIGPDFGQGGVRLDLVDGDRRSVVILSTSSLSRFLDRTERLVPTGQEHTEQELDTVLANLLQT  
>Frankia\_QA3\_FraQA3DRAFT\_2919  
MTIRHDSITAELALRLVVPGGAPVVAATVRYEPADPYAISIGFRTGADEVVEWTFARQLLSDGVRRPAG  
DGDVQVWPAAQSGGRIVCLSLSSPSGHALFEMPRSEVLAFLLRRTYSAVPLGGESDIIDLDAELALLIWGG  
PER  
>Frankia\_QA3\_FraQA3DRAFT\_5229  
MLRRSVRRSTLARGMTARLMPEAEPPRPVVRVFGYDPTDPIAVALTVTGAAGADPVVWRFARRLLADGAR  
RPVGLGDVVRPPIVLGGQPALALCLCGPSGTAELELPAREVA AFLWRTYAMVSADAEAAVIDWTAEFRFM  
PGVGARRSRGLPGVRTPHART  
>Frankia\_QA3\_FraQA3DRAFT\_6034  
MLRHSSTPAHVVRDLSDAFVTEGDARASVAGTLLRYDPADPFAVELILRPGRESITWIFARTLLAEGTQG  
PTGTGDVIRIPTRSEGRAVVTVSLSSPSGHALLELPRSIVTRFLAEIEEKVPAGRESEGIDWNAELRTLL  
RTRNP  
>Frankia\_symbiont\_of\_Datisca\_glomerata\_FsymDg\_2166  
MQVEDVTTELIVDDAPSRGRLTVLQVNWRRADPLAVTLELISRPDHPALPRGTWVVLRLDALRAGLDVPTG  
TGDVIRITPEPERGCIRLDLTAGELHSAVRLSMDAARAFLDATERVVPRGQERAAEELDAVLANLLEN  
>Frankia\_symbiont\_of\_Datisca\_glomerata\_FsymDg\_2563  
MTIRHDSITAELALRLVVPGGAPVVAATMRYEPADPYAVSIGFRTGADEVVEWTFARQLLSDGVRRPAG  
DGDVQVWPAAQSGGRIVCLSLSSPSGHALFEMPRSEVLSFLRRTYSVVPLGGESEVVDLDAELALLIWGG  
PQT  
>Geodermatophilus\_obscurus\_DSM\_43160\_Gobs\_3195  
minratpgytcpttllhlgvpgswtevpallsyeirdpfavritfgdhaeedgiswlvgrd  
llhagldqpagegdvrlwpsrtsgdvlfhlhrapsgealfevsrgtvagflqltasvvpf  
geessvlqvdlgelaallnsggadptgr  
>Kineococcus\_radiotolerans\_SRS30216\_Krad\_3069  
mpalphrktevdvdvslrlrttsggplvpaslhgyaddpyaihavfrggttdvewvfar  
dllreglsapagagdvqvqpcsdspdgrprvllrlsspdgnaeleadesdvrrflrrada  
lvppgretrhldldeliarlv  
>Kitasatospora\_setae\_KSE\_3977  
mhstvqaqnamhlvsselsfrivvlddygdgdpfavrftfhlpqdepvtwvfarellvd  
glrsrptgedvhihpvgddlaevclvlsrpegdalmraaapllaflartdrivpmgqel  
sggeldeelasilsttghenag  
>Kitasatospora\_setae\_KSE\_12250  
mrntvrtrtamhllvpggpalrtpadldydtadplavrltfhpggdpvewvartllla  
glsgpagegdrlrisplvdaglaevaltlrspegeatlrspapllaflartgrlvplgre  
qvtadldrklagilaag  
>Kitasatospora\_setae\_KSE\_14600  
mgswvrrraiprahterkalalmnttvscelhlrlivssesslpvpaglyrdtadpyavh  
atfhtgadetvewvfardllaeglhrrptgtgdvrvwpsrshgqgvvcialsspegealle  
aparalesflkrtdaavppgtehrhfdldrelshilaen  
>Kitasatospora\_setae\_KSE\_28490  
magqstgvveqeelenlvlsersvpvaarlsgshdpfavvyvtfhldsgtpvtwvfare  
llvegtfrpcggdvriwptrsgrrrsvlcmalsspagdalleaplptvaawlerahrlvp  
pgaeleamldgslaella  
>Kitasatospora\_setae\_KSE\_01860  
mthdpyhdpyrdpaprrvppqrgsttriavhlvevvvapalhvpaarlrygadepytv  
hldnhvdlpepvtwslsrevlltglthpagldmtvtpghgpdhghlltlhgeessall  
rlpapalrdrflrrtecvvpvgceqehvldglverllgedgeedghrdee  
>Kitasatospora\_setae\_KSE\_06570  
mavatcwstavlphsphplaveaglhfdsalpyavrlvfppvgrldavewvfgdrlin  
egrlapaghgdvtrpgaagevlvtlrggggeavvnvpaieivtgflvecyalvpagrehe  
hldvdglvarltv  
>Kitasatospora\_setae\_KSE\_11930  
mmespaelrldlvmdlllspeevfavparlvycpddpyavhvsfhvdsaqpigwffardl  
lvqgllrptglgdvrvwpasvdgrrmvtlmlcspegdaflqapaalvaawvrrtlrlvpp  
ggaerarvdealdalfaagtgaagsagvepgc  
>Kitasatospora\_setae\_KSE\_28620  
mfaapaveqtharlivsthrsallrvtlrynaedplavrmvfpaeyaleavdpdtdpl

dgpldeafdapaepvepvadgvvfarqlfaagldlpsgegdvhirpalgqrtmvelrs  
 pegvallqfdrtelrrflwhsylvpeggelrhldcdralaella  
 >Kitasatospora\_setae\_KSE\_55820  
 mpcdplsapsdpptaaptggsrsgavappatveevlelrialdqdlvgevtrfryaaa  
 apyevrltfhlgrpdeadwvfrsdlldrdglqalsgggdvklwpaqcpchgptlhhlalqsp  
 hgsalleasqpqvwrlertyrvvpdgsieellpsdeelaellagg  
 >Kitasatospora\_setae\_KSE\_60010  
 mnhrntprawmrrngepdcvllldvtvapcpglrvavparlryhradpyavhldchvdle  
 epitwlfarellvdgldgwagigdvtrirrstaaeiaialstpggtavlhtpsapvrdfll  
 althrlvpagtehehldaeglmrrmlaeagdvgrfe  
 >Kitasatospora\_setae\_KSE\_05120  
 mpaavfrsfsvtlpsaypdrvaarlrfdpalpygvelafpphrpggeeitwrfgrdll  
 aegrlltpagegdvrvapgdgrilitlgalgpqaeralistpdtavaaflaeaytevppg  
 tetahldlapglarlla  
 >Kitasatospora\_setae\_KSE\_68960  
 mgpvteritlhllapdgttvrltdtdwryrpdpyavslefgpraagarwvlsremllasl  
 hgpvgdgdihfaplddgmllclalggaggtvvltaeaaiaaflaataelvplgseserid  
 wdggladllsa  
 >Micromonospora\_aurantiaca\_ATCC\_27029\_Micau\_1735  
 MSVIRPTTVEVETSLRLVAPDATAALPVRASLRYPADPYAVHVLFAESAGGEAVSWSFARELLVTGLDE  
 PAGIGDVRVWPWATPRGDFVALALSSPDGNALFEVPRSVLVRFLRRTYVVVPRGREAEHLVDVAVNRL  
 AGR  
 >Modestobacter\_marinus\_MODMU\_3374  
 MARSSRSGCTARTTFHLVGPQSWTAVPAALVYDSSDPFAVRVRFGDGATDDVEPALYDDPDDGGVEWLL  
 SRDLLRAGLTGPVGEDEVRLWPARGGLDVLFLQLRAPSGEAMFELSGAVVGDFLRETELLVPAGGESDLL  
 RVDEELSALLRGGTDNPTGR  
 >Nakamurella\_multipartita\_DSM\_44233\_Namu\_3475  
 mydfntveyrmtatvtemvlisdptmppvhaelrrysddpfavqlllsidqspaitwvfg  
 rdllvegvqapagigdvqvfvpvldgtvielrsgeqvasllahtqdlaaflhdhsieivpsg  
 sesayfeieadlrdlpihdafea  
 >Nocardioides\_sp\_JS614\_Noca\_2368  
 mdlpatfgydpadpwawitfrgprdevrwavgrdlllqgltdpagegdiqlwpsidehg  
 raavvmelcspdgrlvtqlhthelyrfltrtlaivpvgseaidlddlvaeltgisrae  
 >Nocardiosis\_alba\_ATCC\_BAA2165\_B005\_0230  
 MNSSDITATAELGLRLVVPERTAVPLVARLDYSADDPYAIRVAFHTGEDSPVEWIFARELLTVGIVRPVG  
 EGDVRVWPSKSEGGERSVSISSPFGQAEFDTQVSPLAEFLHRTYEIVPAGQEGSFVDLDEEIQQLHS  
 >Pseudonocardia\_dioxanivorans\_CB1190\_Psed\_2038  
 MRDVTNIICKQTVFELIAPDSTVTVNVELTYSFRDPFAVEASFRTGNSQPVVVWFARDLLADGLTEATGD  
 GDVTVAPIGHGQVELVLTSPSGHARFHADAAELSSFLEHTYAAVPEGAEYSWLDFAALTELLDEKARD  
 >Pseudonocardia\_dioxanivorans\_CB1190\_Psed\_2715  
 MTTDSVQQDMFTVLHGQPAPVVTRWSYDARDPFAVTFAVRTRGDRWVEWLVARDLVVESELEGPAGHGHIR  
 MSPQIVQGYDIVEIEISSFDGRAILEVDRDLLRSFVDATTELVALGDEPTRMDLDSEIAKLTQGC  
 >Pseudonocardia\_dioxanivorans\_CB1190\_Psed\_7011  
 MTLGRISQTTAHYHHLGKDGVSASSAIEIVVAYDTPYSVQFHFRSGSIQWFVSRDLVISGLEAASGEG  
 DVRVSTHGTVGGDTTILTLNNHEDPSADFTLDAYELMSFLQRTQMVPLGAETRRVQRQIELIDWTRLM  
 >Saccharomonospora\_viridis\_DSM\_43017\_Svir\_14890  
 MRNDHVTLRSTAVFDLLAPRTPPVKVELRYDTRDPYAVVAAFRTGRAGWVEWVFARDL  
 LSDGLLGEAGDGDVRIKSMEDPDSVVFELNSPSGHAMFEASAQELADFLDQTYDVVLP  
 NEHLWVDVDDALTRLIPHDLG  
 >Saccharomonospora\_viridis\_DSM\_43017\_Svir\_01730  
 MDNNAVQSQFVYLSGCETPVL SRLTYVPGAPFTVTMAFKVAPGEWVEWVFARDLLITGLHAPAGIGDIR  
 IRPDLPGQSDMLVIELESPDGYAAVEISRNDVQRFVDATLARVPLGYESERLDIDTVIACLTTRP  
 >Saccharopolyspora\_erythraea\_NRRL\_2338\_SeryN2\_01010001839  
 MFDLLAPQTPAVPVQVELRYDTRDPYAVVAAFRTGRAGWVEWVFARDLLADGLIAHAGVDVTIRPAVDD  
 PEVVVIELSSPSGHAVFEASAQELADFLDRTYDVVVPGNENLWVNVDDALTRLLPHDLS  
 >Saccharopolyspora\_erythraea\_NRRL\_2338\_SACE\_1961  
 MRNDHVTLRSTAVFDLLAPQTPAVPVQVELRYDTRDPYAVVAAFRTGRAGWVEWVFARDLLADGLIAHAG  
 VGDVTIRPAVDDPEVVVIELSSPSGHAVFEASAQELADFLDRTYDVVVPGNENLWVNVDDALTRLLPHDL

S

>Saccharopolyspora\_erythraea\_NRRL\_2338\_SACE\_5535  
MKNHRTVLTSMVFKLLAPAGATAPVGVELRFESRNPYEVSLAFSAGSGGHVEWVVLARDLLADGLMIDSGE  
GDVVRVGPDASDPAVIVVSLSSPSGQATFEADAQELVDFLNRITYDVPVPGKEHQWMSIDEALARMLPHDLY  
>Saccharothrix\_espanaensis\_DSM\_44229\_BN6\_28660  
MRNDHVTLRSTAVFDLLAPRTPAVPVQVELRYDTKDPYAVVAAFRTGRAGWVEWVYARDLLADGLIADAG  
DGDVVRIRPAADDPEVVVIELSSPSGHAMFEASAQELADFLDRITYDVPVPGNEHLWVDVDEALTHLISNDL  
T  
>Saccharopolyspora\_spinosa\_NRRL\_18395\_SspiN1\_010100019986  
MTSQNHKTIRSNVFDLTAPAGVRSVWVVELRYESREPYAVNMSFHAGMTGQIDWVIARDLLADGLIVAS  
GEGDVQIIPQPDNHELVI IALSSPSGQAFAEHAELADFLDETYDVPVAPGDEHKWMSIDEELSRLQND  
LH  
>Saccharopolyspora\_spinosa\_NRRL\_18395\_SspiN1\_010100008660  
MTRLSTAVFDLLAPQTPAVPVQVELRYDTRDPYAVVAAFRTGRAGWVEWVVFARDLLADGLIAHAGEGDVT  
IRPAVDAPEVVAIELSSPSGHAVFEASAQELADFLDRITYDVPVPGNENLWVDVDEALTRLLPHDLG  
>Saccharopolyspora\_spinosa\_NRRL\_18395\_SspiN1\_010100036409  
MMANDHGTVLATMIFNLVAPAGVIAPVGVQLRYDSRNPYEISMKLNVTGTDGQVDWVIARDLLADGLIAEA  
GEGDVVRIRPRLLDDPTLVMIEMSSPSGQATFEVNADQLADFNVDITYDVPVAPGDEHRWMMNVDEALSRLLSHN  
L  
>Saccharopolyspora\_spinosa\_NRRL\_18395\_SspiN1\_010100037964  
MMANDHGTVLATMIFNLVAPAGVIAPVGVVELRYDSRNPYEISMKLNVTGTDGQVDWVIARDLLADGLIAEA  
GEGDVVRIRPRLDASGVVIELSSPSGQASFEVDADQLVDFVNDITYDVPVAPGDEHRWMMNVDEVLSRLLSHN  
L  
>Saccharopolyspora\_spinosa\_NRRL\_18395\_SspiN1\_010100037024  
MMANDHGTVLATMIFNLVAPAGVIAPVGVQLRYDSRNPYEISMKLNVTGTDGQVDWVIARDLLADGLIAEA  
GEGDVVRIRPRLDSSGVVIELSSPSGQASFEVNADQLADFNVDITYDVPVAPGDEHRWMMNVDEVLSRLLSHN  
L  
>Saccharopolyspora\_spinosa\_NRRL\_18395\_SspiN1\_010100013985  
MMANDHGTVLATMTFNLVAPAGVIAPVGVVELRYDSRNPYEIAMKLNVTGTDGQVDWVIARGRLADGLIAEA  
GEGDVVRIRPRLLDDPTLVVIELSSPSGQASFEVNADQLADFNVDITYDVPVPEPDEHRWMMNIDETLSQLLSHN  
L  
>Saccharopolyspora\_spinosa\_NRRL\_18395\_SspiN1\_010100035064  
MVRNHRLIIRFATVFDLATPPVVSPPIQLELRYETRDPYAVGMIFNPNRNSRAHCMIARDLLAAGLVSR  
GEGNVRI SPRPDNPELVVIALTAPSGQGVFETRDTVLARFLNDTYAIIASGDEHRWLSVDDALSRVLLND  
RRNDRSPA EHD  
>Saccharopolyspora\_spinosa\_NRRL\_18395\_SspiN1\_010100022770  
MMANDHGTVLATMTFNLVAPAGAIAPVGVVELRYDSRNPYEIAMKLNVTGTDGQVDWVIARDLLADGLIAEA  
GEGDVVRIRPRLDSSGVVIELSSPSGQASFEVPRRLDASGVVIELSSPSGQASFEVDADQLVDFVNDITY  
DVPVAPGDEHRWMMNVDEVLSRLLSHNL  
>Saccharopolyspora\_spinosa\_NRRL\_18395\_SspiN1\_010100038174  
MKGDMADLAFVANDHGTVLATMIFNLVAPAGVIAPVGVVELRYDSRNPYEIAMKLNVTGADGQVDWVIARD  
LLADGLIATPHRRRHTTLLSTTHRRPGSTPQIRRTLQTRLPHPHRQLFSTRPRGLTSRLLGQTI SRCPMQR  
DRNLIHHQIKRHPLRRLHHTKHRTHSHAHHRQVSVAFRSNCVKTPGRGFLASLTGVVTACGRRQGAWRCVI  
SGIVARRVGPWQPRRRRRRWTSS  
>Saccharothrix\_espanaensis\_DSM\_44229\_BN6\_78400  
MSAESITASTTFHLLVPGVAPAPVEAELHYEPEDPYAVAVLFFHTGQKVEWIFARDLLADGLLTPSGEGD  
ILVRPAADDPERVLLELNAPTGFALISAQAEDIAEFLDLTYDVPVQPGEEDLWIDFDRELAKLVSTN  
>Salinispora\_arenicola\_CNS205\_Sare\_1560  
MSVIRPTTVEVETSLRLVAPDATALPVRASLRYDPADPYAVHVLFFHAESAGGEAVSWSFARELLVTGLDE  
PAGIGDVVRVWPWATPRGDFVALALSSPDGNALFEVPRSVLVRFLRRTYVVVARGREAEHLVDVDTAVSRL  
LAGR  
>Salinispora\_tropica\_CNB440\_Strop1600  
MSVIRPTTVEVETSLRLVAPDATALPVRASLRYDPADPYAVHVLFFHAESAGGEAVSWSFA  
RELLVTGLDEPAGIGDVVRVWPWATPRGDFVALALSSPDGNALFEVPRSVLVRFLRRTYVV  
VARGREAEHLVDVDTAVNRLLAGR  
>Stackebrandtia\_nassauensis\_DSM\_44728\_Snas\_3098  
mattrpatvevdtmrfvatdfttnvrasmrydaddpyaihvmfhgpnpdacqsvsfsa  
rellaaglveptgmgdvrwvwpstprgdaialalsspdgnalfevsrslvsrflrrsyal

vpkgkegdsldmdatvaklladr  
 >Thermobifida\_fusca\_YX\_Tfus\_2111  
 MSSSGTSITCEVGLQLIVPDRAPVPLVARLDYSVDDPYAIRAAFHVGDDEPV  
 EWIFARELLTVGI IRETGEGDVRIWPSQDGKERMVNIALSSPFGQARFHAQV  
 APLSEFLHRTYELVPAGQESDYIDIDAEIAEHLs  
 >Thermobispora\_bispora\_DSM\_43833\_Tbis\_2095  
 mnsitvsaelglrlvvpdrttipltasltytatdpyairmafhnvgndepvewifarellt  
 igmvrvggedvqvwpartegeqslnisltspfgqalfevplapltaflnrtyelvpagr  
 esdfmdldqelsnmlwss  
 >Thermomonospora\_curvata\_DSM\_43183\_Tcur\_2048  
 mdsrtisaelglrlvvpdrttvpllaeveyatddpyairmsfyvgndepvewifarell  
 tvgivrvgdgdvqvwpaeppgdrivhialsspfgdalfevplpplaeflhrtyravpag  
 reaefidmeaelenllwps  
 >Verrucosia\_maris\_AB18032\_VAB18032\_13260  
 MSVIRPTTVEVETSLRLVAPDATAALPVRASLRYPADPYAVHVLFAESAGGEAVSWSFARELLVTGLDE  
 PAGIGDVRVWPWATPRGDFVALALSSPDGNALFEVPRSVLVRFLRRTYVVVPRGREAEHLVDVDTAVNRL  
 AGR  
 >Streptomyces\_venezuelae\_ATCC\_10712\_SsgB  
 MNTTVSCELHLRLVSSSESLPVPAGLRYDTADPYAVHATFHTGAEETVEWVVFARDLLAEGLHRPTGTGD  
 VRVWPSRSHGQGVVCIALSSPEGEALLEAPARALESFLLKRTDAAVPPGTEHRHFDLDTLSHILADS  
 >Streptomyces\_venezuelae\_ATCC\_10712\_SsgG  
 MQNTDNTTVERELELKLVLSPERAVPVPARLAYRTDDPYAVHITFHVGTDHPVNWTFARELLVEGVFRAC  
 GHGDVRIWPTKVDGRNVLMALSSPDGDALLEAPSAQVSAWLERTLRVPPGTESDRLGIDDGLAELLAT  
 TVIADELWLRDPWPSDESQDGEQ  
 >Streptomyces\_venezuelae\_ATCC\_10712\_SsgE  
 MAAAEDPEVEDHARGRIISDAPLSRPVVDLRYDPGFSPATVRFVFPDIEWSFPRVLLLETGLRAPTRRG  
 DIGVWPCGRVQTVVELHKNDGDVTVVQFDTTALTRFLKHTYAAGASMTTS  
 >Streptomyces\_venezuelae\_ATCC\_10712\_SsgA  
 MSFLVSEELSFKIPVELRYETRDYAVRMTFHLPGDAPVTWAFGRELLLDGINRPSGDGDVHIAPTDP  
 LSDVSIQLQVGGDRALFRASAPPLVAFDLRTDKLVPLGQERTLGFEDNLEAALGRILAEESAGPTA  
 >Streptomyces\_venezuelae\_ATCC\_10712\_SsgD  
 MPAVIEQAVQARLVASAPRMTVPATLRYDRGDPYAVSMAFPFPATLEGVEVSWAFARELLVQGV  
 VERPAGVGDVRLRPYGYDRTVVEFHAEPEGVAMVHVRTSELRRFLERSQHLVPAGREHQYLDWEQDL  
 AELLRDRP SVEN\_0129  
 >Streptomyces\_venezuelae\_ATCC\_10712\_SVEN\_0129  
 MSDSSRHETSRTAAAPVRSWHTTARQVHGGMLPVPATFHYDPDDPWAVHIVFRLPPGRVVDWV  
 FSRDL LRSRTRVLSGEGDVRLWPLRDGGREGRVHLRLGQAGAFALVDVDRAGLSWLAETYEAVPE  
 GTEAARIDW AAETAQLFARP  
 >Streptomyces\_griseus\_subsp\_griseus\_NBRC\_13350\_SGR\_41t  
 MSLHHDNAMPTADDDEFAALMAASSLRAPHVRALSDPIPNARSRLRETAEGPDTEQEPTACETQEATAD  
 AGDGDHSEEEPLATYRAGTWQPPALSRLTEVYRRLPWTIDRGPFGHHTSALHIRPLLAADLLETTRATD  
 ILVWLSREPDNDRHYLVTPGTGAALAPTLPCATDRSPTYSSARALLRLALPQWQKEYLLDARPGTGS  
 PDF RLACTSLGPSASLAWVDSAIRFQTTREDCSAFRWVGDSSEKHAPDADSRHRLHTLLSQAYESALV  
 YYAARE PGGNLRPFQDLVTPGTADPTDTGAPAPALASLTAGRLTDLLQPVQPPHLEQLHHPADR  
 WTGCRISTNP DRFPAGAWRPLLLGALADSPWAPRKTGQRLITGEAAPGSPTPQDATPMIDVPLTPA  
 HLLIAADSAVSLDQ AHRHTIPEQVPTPPDLDAYTAQPGSLLLLPAATTSTAAGHGDNREAVHWT  
 PRTERDFPSEGGSSGSPSKFPD NDSRTPKLWSTKTEDGVDDLEQRMQLWMRQHDTEDDRGDRILIE  
 LVYRTKDPHAVTAVFYTGTEEELEWT FARELLADGLHTSVGLGDVIVWPGPEGPGDTQRIFIRL  
 RPPGSTALLSLDRDDALEFLEATHPLLNPRATARTAVLPWAEQELRDLICPGTGE  
 >Streptomyces\_griseus\_subsp\_griseus\_NBRC\_13350\_SGR\_128  
 MSLHQDNAMPTAADDDEFTALMAASSLRAPHVRALSDPIPDEAQTRLRESAEGPDAEQEPTARTTQEAT  
 TDAGDASEDDPLDPCRLGNWPLRTFSWTMNSVLGTPEHHAPALHLRALLAAGPPATTRTTGIHEW  
 LLREP DNNRHLYLMMHTEDPLTPTLLPCTTDPGPTYSSASAFRLMALFRRRLEHVLGARPGTGF  
 PDYRLTSTSAGP SAESLARTSFDIELNNTCNMYTALRLAGEPESESRGFTSRIRIHALMKQAYE  
 SALIDYAAHELAGNSQRSD QQVRAPGTADPTRFGAPAPAHSIDRLAAGRLTDLLQPARPPHIEQL  
 HQHPADGRTRCRIATIPDRVPAGA WRPLLLSALSGYPWAHGTTPGHLLITGETALPGLTPQDTTAV  
 TNRLTPAHLIIATDSAVSLDQHRHTI PEQAPTTPDLDAYTAQPGSLLLLPAATATAAGHGDSRKT  
 VNRTHDTEPDKELTSQNSSSDPSELLTDDR RTTKLWTRTDDAGDGLEQRMQLWMRQHHTEDDRG  
 DRILTQLAYRTKDPYAVTAVFYAGTEEELEWTFAR

ELLTDGLHTSVGIGDVIIWPGPQRPQDGTQRI FIRLRPPGSTALLSLDHDDALEFLETTQPLPQNPSATAR  
TAVLATWEQELRDLCPSPE  
>Streptomyces\_griseus\_subsp\_griseus\_NBRC\_13350\_SsgD  
MSSVIEQSVQARMVASAPRMTLPATLQYDRQYPPFAVRMAFPAPATLEGTEVSWEFSSRELLTTGVDS  
PAGQGDVVRVRFPGYERTVLEFHAFEGIAMVHVRTDELRRFLQRAQELVPMGDEHRYLDLDRGLTDLLGGPR  
>Streptomyces\_griseus\_subsp\_griseus\_NBRC\_13350\_SsgA  
MSFLVSEELSFRI PVELRYEVGDPYAIRMTFHLPGDAPVTWAFGRELLLDGLNSPSGDGDVHIGPTEPE  
GLGDVHIRLQVGADRALFRAGTAPLVAFLDRTDKLVPLGQEHTLGDFDGNLEDALGRILAEEQNAG  
>Streptomyces\_griseus\_subsp\_griseus\_NBRC\_13350\_SsgE  
MSPVIEVHARARLITDGPLTRPVVDLRYDPADERRTVHIGLPDGTDWSFGRDLLERGLRTPIERGDV  
RVWPCGRTQLIVELHSTDGVEVFQFEIRTLIRFLARTRAQTAPATAPDTGREAPRPPSRTRPERGTP  
ERGARTEQRDARAGRGAQTARG  
>Streptomyces\_griseus\_subsp\_griseus\_NBRC\_13350\_SsgG  
MMSIVERELELKLVLSPERSIPVPARLTYRTDDPYAVHIAFHIGSESPVHWTFARELLVEGVFRPCGH  
GDVRIWPTKVAGRSVVCVALTSPDGNALLEMNSAAVAAWVERTLRVPPGSESDRLGIDEALAE  
LLAPLPADDLWLSDPWQSDDAPSQDGEA  
>Streptomyces\_griseus\_subsp\_griseus\_NBRC\_13350\_SsgB  
MNTTVSCELHLRLVSSSESLPVPAGLRYDTADPYAVHATFHTGAEET  
VEWVFARDLLAEGLHRPTGTGDVVRVWPSRSHGQGVVCIALLSSPEGEALLEAPARALE  
SFLKRTDAAVPPGTEHRHFDLDELHILAE  
>Streptomyces\_bottropensis\_ATCC\_25435\_SBD\_2172  
MTVRKGEPMDHAAATDEEFDALLDASSLGAPHVVATTGDIPATARRRMAHAASRPPKSLGMPDNTSYP  
QP\_DDEADSRPAAPTDAEEAAQEVQLLRGILIGATSTGKSAVLAALLAYRHLSLGSRRQLLAPR  
FWMPSAADLLRSTLRPTGGFDEAVRSGRAQRGIPRGDGTVIFSRQDTQPWHMLVSVLRSPSGEP  
QAIPSF'TDACRQAMQLLAPDIQMHASPTLHTLGGAWAGRKQQLRQNLRHMI EPWAHPAQPLFSAT  
PTGLLVHPAPAARLHIARFTTCAYTAVGGGLL PKTGAAPQHPRCARDSSRTGRDRRQPAASGGM  
TLRQTLVGGVHEL SAEPLMLLHIEERESLALTSSLHTRLTYRVS DPYAVEARFRADDQGETVWIF  
ARDLLRDGLERRNGLGDVSVWPDVGRGRPRVFLRLSSPEGSALLSAEYADVRAFLEAGSNMVAY  
GAEHAHLLPALNSLETTIGELARPGRC
